# Supplementary material for: Characterization of the MDSC Proteome Associated with Metastatic Murine Mammary Tumors Using Label-Free Mass Spectrometry and Shotgun Proteomics
Source: PLoS One. 2011 Aug 10;6(8):e22446. doi: 10.1371/journal.pone.0022446 (PMC3154190; doi:10.1371/journal.pone.0022446)
Supplement: Table S3 — All MDSC proteins identified by MUDPIT in response to tumor metastatic potential. a Protein Name, b Gene Description, c Uniprot ID , d spectral count, e total spectral count, and f Log2 (spectral count 4T1/67NR) protein abundance ratio. (XLS) [file pone.0022446.s003.xls]

## Sheet: FIGURE SUUPLEMENTAL TABLE 01
			d Spectral Count		e Total Spectra
a Protein Name	b Discription	c Uniprot ID	4T1	67NR		f Log2 (4T1/67NR)
All detectable protiens including reverse entries
1,4-alpha-glucan-branching enzyme	GN=Gbe1	GLGB_MOUSE	3	7	10	-1.22239
10 kDa heat shock protein	GN=Hspe1	CH10_MOUSE	9	4	13	1.16993
15 kDa selenoprotein AC=Q9ERR7 OS=Mus musculus (Mouse).	GN=Sep15	SEP15_MOUSE	3	5	8	-0.736966
17beta-hydroxysteroid dehydrogenase type 10/short chain L-3-hydroxyacyl-CoA dehydrogenase	GN=Hsd17b10	Q99N15_MOUSE	11	9	20	0.289507
1-acyl-sn-glycerol-3-phosphate acyltransferase beta	GN=Agpat2	PLCB_MOUSE	2	2	4	0
1-O-acylceramide synthase	GN=Lypla3	LYPA3_MOUSE	3	0	3	N/A
2',5'-phosphodiesterase 12	GN=Pde12	PDE12_MOUSE	4	2	6	1
2500003M10Rik protein AC=Q2VPR3 OS=Mus musculus (Mouse).	GN=2500003M10Rik	Q2VPR3_MOUSE	3	0	3	N/A
2'-5'-oligoadenylate synthetase 1A	GN=Oas1a	OAS1A_MOUSE	6	4	10	0.584963
26S protease regulatory subunit 7	GN=Psmc2	PRS7_MOUSE	15	9	24	0.736966
26S protease regulatory subunit S10B	GN=Psmc6	PRS10_MOUSE	9	5	14	0.847997
26S proteasome non-ATPase regulatory subunit 10	GN=Psmd10	PSD10_MOUSE	1	4	5	-2
26S proteasome non-ATPase regulatory subunit 3	GN=Psmd3	PSMD3_MOUSE	11	9	20	0.289507
26S proteasome non-ATPase regulatory subunit 5	GN=Psmd5	A2AUB0_MOUSE	4	10	14	-1.32193
26S proteasome non-ATPase regulatory subunit 6	GN=Psmd6	PSMD6_MOUSE	12	10	22	0.263034
26S proteasome non-ATPase regulatory subunit 8	GN=Psmd8	PSMD8_MOUSE	6	4	10	0.584963
28S ribosomal protein S29	GN=Dap3	RT29_MOUSE	3	0	3	N/A
39S ribosomal protein L1	GN=Mrpl1	RM01_MOUSE	3	0	3	N/A
39S ribosomal protein L11	GN=Mrpl11	RM11_MOUSE	2	1	3	1
3-hydroxyisobutyrate dehydrogenase	GN=Hibadh	3HIDH_MOUSE	4	1	5	2
3-hydroxyisobutyryl-CoA hydrolase	GN=Hibch	HIBCH_MOUSE	3	4	7	-0.415037
3-ketoacyl-CoA thiolase A	GN=Acaa1a	THIKA_MOUSE	14	9	23	0.63743
40 kDa peptidyl-prolyl cis-trans isomerase	GN=Ppid	PPID_MOUSE	12	10	22	0.263034
40S ribosomal protein S27 AC=Q6ZWU9 OS=Mus musculus (Mouse).	GN=Rps27	RS27_MOUSE	1	4	5	-2
40S ribosomal protein S27-like protein AC=Q6ZWY3 OS=Mus musculus (Mouse).	GN=Rps27l	RS27L_MOUSE	1	3	4	-1.58496
5,10-methenyl-tetrahydrofolate synthetase	GN=Mthfs	B2KF82_MOUSE	0	3	3	N/A
5',3'-nucleotidase, cytosolic	GN=Nt5c	A2A9X5_MOUSE	10	11	21	-0.137504
5'-3' exoribonuclease 2	GN=Xrn2	A2ATK1_MOUSE	6	5	11	0.263034
5'-AMP-activated protein kinase catalytic subunit alpha-1 AC=Q5EG47 OS=Mus musculus (Mouse).	GN=Prkaa1	AAPK1_MOUSE	9	10	19	-0.152003
5'-AMP-activated protein kinase subunit beta-1 AC=Q9R078 OS=Mus musculus (Mouse).	GN=Prkab1	AAKB1_MOUSE	3	6	9	-1
5'-AMP-activated protein kinase subunit gamma-1 AC=O54950 OS=Mus musculus (Mouse).	GN=Prkag1	AAKG1_MOUSE	9	12	21	-0.415037
5'-nucleotidase domain-containing protein 1	GN=Nt5dc1	NT5D1_MOUSE	7	4	11	0.807355
60S acidic ribosomal protein P2 AC=P99027 OS=Mus musculus (Mouse).	GN=Rplp2	RLA2_MOUSE	10	10	20	0
60S ribosomal protein L6 AC=Q3UCH0 OS=Mus musculus (Mouse).	GN=Rpl6	Q3UCH0_MOUSE	9	3	12	1.58496
6-phosphofructokinase	GN=Pfkl	K6PL_MOUSE	4	5	9	-0.321928
6-phosphofructokinase type C	GN=Pfkp	K6PP_MOUSE	11	8	19	0.459432
6-phosphogluconolactonase AC=Q9CQ60 OS=Mus musculus (Mouse).	GN=Pgls	6PGL_MOUSE	22	25	47	-0.184425
A6 anti-[4-hydroxy-3-nitrophenyl(Phenolate form)] acetyl mAb V-L region AC=A2MXS5 OS=Mus musculus (Mouse).	GN=Igl-V1	A2MXS5_MOUSE	3	0	3	N/A
Acetoacetyl-CoA synthetase AC=Q9D2R0 OS=Mus musculus (Mouse).	GN=Aacs	AACS_MOUSE	4	1	5	2
Acetyl-CoA acetyltransferase	GN=Acat2	THIC_MOUSE	2	5	7	-1.32193
Acetyl-CoA carboxylase 1	GN=Acaca	ACACA_MOUSE	6	6	12	0
Acetyl-coenzyme A transporter 1	GN=Slc33a1	ACATN_MOUSE	3	1	4	1.58496
Acid ceramidase	GN=Asah1	ASAH1_MOUSE	9	2	11	2.16993
Acid phosphatase 2 lysosomal	GN=Acp2	A2AGR5_MOUSE	4	1	5	2
Acid phosphatase-like protein 2 AC=Q8BHA9 OS=Mus musculus (Mouse).	GN=Acpl2	ACPL2_MOUSE	1	3	4	-1.58496
Acidic leucine-rich nuclear phosphoprotein 32 family member E	GN=Anp32e	AN32E_MOUSE	23	13	36	0.823122
Actin-like protein 6A	GN=Actl6a	ACL6A_MOUSE	8	8	16	0
Actin-related protein 10 AC=Q9QZB7 OS=Mus musculus (Mouse).	GN=Actr10	ARP10_MOUSE	2	4	6	-1
Actin-related protein 2/3 complex subunit 3	GN=Arpc3	ARPC3_MOUSE	8	14	22	-0.807355
Actin-related protein 2/3 complex subunit 4	GN=Arpc4	ARPC4_MOUSE	45	53	98	-0.236067
Actin-related protein 2/3 complex subunit 5	GN=Arpc5	ARPC5_MOUSE	15	27	42	-0.847997
Activated RNA polymerase II transcriptional coactivator p15	GN=Sub1	TCP4_MOUSE	4	5	9	-0.321928
Activator of 90 kDa heat shock protein ATPase homolog 1 AC=Q8BK64 OS=Mus musculus (Mouse).	GN=Ahsa1	AHSA1_MOUSE	7	10	17	-0.514573
Active breakpoint cluster region-related protein AC=Q6PCY1 OS=Mus musculus (Mouse).	GN=Abr	ABR_MOUSE	5	6	11	-0.263034
Acylamino-acid-releasing enzyme	GN=Apeh	APEH_MOUSE	5	10	15	-1
Acyl-CoA dehydrogenase family member 11 AC=Q80XL6 OS=Mus musculus (Mouse).	GN=Acad11	ACD11_MOUSE	2	2	4	0
Acyl-CoA synthetase short-chain family member 2 AC=A2AQN4 OS=Mus musculus (Mouse).	GN=Myh7b	A2AQN4_MOUSE	1	2	3	-1
Acyl-CoA:lysophosphatidylglycerol acyltransferase 1 AC=Q91YX5 OS=Mus musculus (Mouse).	GN=Lpgat1	LGAT1_MOUSE	0	3	3	N/A
Acyl-CoA-binding protein	GN=Dbi	ACBP_MOUSE	4	5	9	-0.321928
Acyl-Coenzyme A dehydrogenase	GN=Acads	Q91W85_MOUSE	7	4	11	0.807355
Acyl-coenzyme A thioesterase 8	GN=Acot8	ACOT8_MOUSE	2	1	3	1
Acyl-coenzyme A thioesterase 9	GN=Acot9	ACOT9_MOUSE	5	6	11	-0.263034
Acyl-protein thioesterase 1	GN=Lypla1	LYPA1_MOUSE	2	6	8	-1.58496
Adar protein AC=Q4FJS9 OS=Mus musculus (Mouse).	GN=Adar	Q4FJS9_MOUSE	4	1	5	2
Add3 protein AC=Q05C56 OS=Mus musculus (Mouse).	GN=Add3	Q05C56_MOUSE	8	12	20	-0.584963
Adenine phosphoribosyltransferase AC=P08030 OS=Mus musculus (Mouse).	GN=Aprt	APT_MOUSE	6	15	21	-1.32193
Adenosine deaminase	GN=Ada	ADA_MOUSE	6	5	11	0.263034
Adenosine kinase	GN=Adk	ADK_MOUSE	2	3	5	-0.584963
Adenosine monophosphate deaminase 2 (Isoform L)	GN=Ampd2	A2AE27_MOUSE	3	13	16	-2.11548
Adenosylhomocysteinase AC=Q3TF14 OS=Mus musculus (Mouse).	GN=Ahcy	Q3TF14_MOUSE	15	13	28	0.206451
Adenylate kinase 2	GN=Ak2	KAD2_MOUSE	23	12	35	0.938599
Adenylosuccinate synthetase AC=B9EIE9 OS=Mus musculus (Mouse).	GN=Adss	B9EIE9_MOUSE	7	7	14	0
Adipocyte plasma membrane-associated protein	GN=Apmap	APMAP_MOUSE	9	15	24	-0.736966
ADP-dependent glucokinase AC=Q8VDL4 OS=Mus musculus (Mouse).	GN=Adpgk	ADPGK_MOUSE	25	40	65	-0.678072
ADP-ribosyl cyclase 2	GN=Bst1	BST1_MOUSE	3	3	6	0
ADP-ribosylation factor 6 AC=P62331 OS=Mus musculus (Mouse).	GN=Arf6	ARF6_MOUSE	7	7	14	0
ADP-ribosylation factor GTPase activating protein 1 AC=A8WIR9 OS=Mus musculus (Mouse).	GN=Arfgap1	A8WIR9_MOUSE	7	3	10	1.22239
ADP-ribosylation factor GTPase-activating protein 2	GN=Arfgap2	ARFG2_MOUSE	6	0	6	N/A
ADp-ribosylation factor guanine nucleotide-exchange factor 2 (Brefeldin A-inhibited)	GN=Arfgef2	A2A5R2_MOUSE	9	9	18	0
ADP-ribosylation factor-binding protein GGA1	GN=Gga1	GGA1_MOUSE	2	2	4	0
ADP-ribosylation factor-like protein 1 AC=P61211 OS=Mus musculus (Mouse).	GN=Arl1	ARL1_MOUSE	3	3	6	0
ADP-ribosylation factor-like protein 2 AC=Q9D0J4 OS=Mus musculus (Mouse).	GN=Arl2	ARL2_MOUSE	2	2	4	0
ADP-ribosylation factor-like protein 3 AC=Q9WUL7 OS=Mus musculus (Mouse).	GN=Arl3	ARL3_MOUSE	4	2	6	1
ADP-ribosylation factor-like protein 8A	GN=Arl8a	ARL8A_MOUSE	7	3	10	1.22239
ADP-ribosylation factor-like protein 8B	GN=Arl8b	ARL8B_MOUSE	7	3	10	1.22239
ADP-ribosylhydrolase like 2 AC=A3KFY3 OS=Mus musculus (Mouse).	GN=Adprhl2	A3KFY3_MOUSE	0	4	4	N/A
Adrenocortical dysplasia protein AC=Q5EE38 OS=Mus musculus (Mouse).	GN=Acd	ACD_MOUSE	2	1	3	1
AFG3-like protein 2 AC=Q8JZQ2 OS=Mus musculus (Mouse).	GN=Afg3l2	AFG32_MOUSE	3	1	4	1.58496
AH receptor-interacting protein	GN=Aip	AIP_MOUSE	7	9	16	-0.36257
A-kinase anchor protein 8	GN=Akap8	AKAP8_MOUSE	4	1	5	2
Alcohol dehydrogenase [NADP+]	GN=Akr1a1	AK1A1_MOUSE	8	7	15	0.192645
Alcohol dehydrogenase class-3	GN=Adh5	ADHX_MOUSE	7	3	10	1.22239
Aldehyde dehydrogenase family 16 member A1 AC=Q571I9 OS=Mus musculus (Mouse).	GN=Aldh16a1	A16A1_MOUSE	15	15	30	0
Aldehyde dehydrogenase family 3 member B1	GN=Aldh3b1	AL3B1_MOUSE	8	12	20	-0.584963
Aldo-keto reductase family 7	GN=Akr7a5	A2AMV3_MOUSE	3	0	3	N/A
Aldose reductase	GN=Akr1b1	ALDR_MOUSE	10	5	15	1
Alpha thalassemia/mental retardation syndrome X-linked homolog (Human) AC=A2ADH4 OS=Mus musculus (Mouse).	GN=Atrx	A2ADH4_MOUSE	4	4	8	0
Alpha-1	GN=Alg2	ALG2_MOUSE	3	1	4	1.58496
Alpha-1-acid glycoprotein 1	GN=Orm1	A1AG1_MOUSE	6	9	15	-0.584963
Alpha-1-acid glycoprotein 3	GN=Orm3	A1AG3_MOUSE	0	2	2	N/A
Alpha-1-antitrypsin 1-1	GN=Serpina1a	A1AT1_MOUSE	12	8	20	0.584963
Alpha-2-HS-glycoprotein	GN=Ahsg	FETUA_MOUSE	8	3	11	1.41504
Alpha-2-macroglobulin	GN=A2m	A2M_MOUSE	4	0	4	N/A
Alpha-2-macroglobulin receptor-associated protein	GN=Lrpap1	AMRP_MOUSE	2	2	4	0
Alpha-adducin	GN=Add1	ADDA_MOUSE	7	18	25	-1.36257
Alpha-centractin	GN=Actr1a	ACTZ_MOUSE	10	10	20	0
Alpha-globin AC=A8DUV3 OS=Mus musculus (Mouse).	GN=Hba-a1	A8DUV3_MOUSE	12	3	15	2
Alpha-N-acetylgalactosaminidase	GN=Naga	NAGAB_MOUSE	8	8	16	0
Alpha-N-acetylglucosaminidase (Sanfilippo disease IIIB) AC=A2BFA6 OS=Mus musculus (Mouse).	GN=Naglu	A2BFA6_MOUSE	5	1	6	2.32193
Alpha-soluble NSF attachment protein	GN=Napa	SNAA_MOUSE	11	5	16	1.1375
Aminopeptidase N	GN=Anpep	AMPN_MOUSE	4	0	4	N/A
Aminopeptidase-like 1 AC=A2ACM6 OS=Mus musculus (Mouse).	GN=Npepl1	A2ACM6_MOUSE	1	2	3	-1
AMP deaminase 3	GN=Ampd3	AMPD3_MOUSE	9	13	22	-0.530515
Amyloid beta A4 precursor protein-binding family B member 1-interacting protein	GN=Apbb1ip	AB1IP_MOUSE	10	17	27	-0.765535
AN1-type zinc finger protein 2B AC=Q91X58 OS=Mus musculus (Mouse).	GN=Zfand2b	ZFN2B_MOUSE	3	1	4	1.58496
Anamorsin	GN=Ciapin1	CPIN1_MOUSE	3	4	7	-0.415037
Ankyrin repeat and BTB/POZ domain-containing protein 2 AC=Q7TQI7 OS=Mus musculus (Mouse).	GN=Abtb2	ABTB2_MOUSE	1	2	3	-1
Ankyrin repeat and FYVE domain-containing protein 1	GN=Ankfy1	ANFY1_MOUSE	15	15	30	0
Ankyrin repeat and MYND domain-containing protein 2 AC=Q3TPE9 OS=Mus musculus (Mouse).	GN=Ankmy2	ANKY2_MOUSE	2	2	4	0
Ankyrin repeat domain-containing protein 13A AC=Q80UP5 OS=Mus musculus (Mouse).	GN=Ankrd13a	AN13A_MOUSE	6	6	12	0
Annexin A4	GN=Anxa4	ANXA4_MOUSE	8	4	12	1
Annexin A5	GN=Anxa5	ANXA5_MOUSE	20	8	28	1.32193
Anoctamin-10	GN=Ano10	ANO10_MOUSE	2	6	8	-1.58496
Anoctamin-6	GN=Ano6	ANO6_MOUSE	3	3	6	0
Anti-colorectal carcinoma light chain AC=Q7TS98 OS=Mus musculus (Mouse).	GN=Tsc1	Q7TS98_MOUSE	9	1	10	3.16993
AP-1 complex subunit gamma-1	GN=Ap1g1	AP1G1_MOUSE	16	11	27	0.540568
AP-1 complex subunit mu-1	GN=Ap1m1	AP1M1_MOUSE	8	8	16	0
AP-1 complex subunit sigma-1A	GN=Ap1s1	AP1S1_MOUSE	2	2	4	0
AP-1 complex subunit sigma-2	GN=Ap1s2	AP1S2_MOUSE	2	1	3	1
AP1 subunit gamma-binding protein 1	GN=Ap1gbp1	SYNG_MOUSE	2	1	3	1
AP-2 complex subunit mu-1	GN=Ap2m1	AP2M1_MOUSE	7	5	12	0.485427
AP2-associated protein kinase 1	GN=Aak1	AAK1_MOUSE	4	2	6	1
AP-3 complex subunit beta-1	GN=Ap3b1	AP3B1_MOUSE	8	9	17	-0.169925
AP-3 complex subunit delta-1	GN=Ap3d1	AP3D1_MOUSE	7	4	11	0.807355
AP-3 complex subunit mu-1	GN=Ap3m1	AP3M1_MOUSE	4	5	9	-0.321928
AP-3 complex subunit sigma-1	GN=Ap3s1	AP3S1_MOUSE	1	2	3	-1
APAF1 interacting protein	GN=Apip	A2AWH9_MOUSE	4	4	8	0
Apolipoprotein A-I AC=Q00623 OS=Mus musculus (Mouse).	GN=Apoa1	APOA1_MOUSE	5	3	8	0.736966
Apolipoprotein A-I-binding protein AC=Q8K4Z3 OS=Mus musculus (Mouse).	GN=Apoa1bp	AIBP_MOUSE	4	4	8	0
Apolipoprotein E AC=P08226 OS=Mus musculus (Mouse).	GN=Apoe	APOE_MOUSE	7	0	7	N/A
Apolipoprotein O-like	GN=Apool	APOOL_MOUSE	4	1	5	2
Apoptosis inhibitor 5	GN=Api5	API5_MOUSE	8	11	19	-0.459432
Apoptosis regulator BAX AC=Q07813 OS=Mus musculus (Mouse).	GN=Bax	BAX_MOUSE	7	4	11	0.807355
Apoptosis-associated speck-like protein containing a CARD	GN=Pycard	ASC_MOUSE	3	5	8	-0.736966
Apoptosis-associated tyrosine kinase 1B AC=A6BLY8 OS=Mus musculus (Mouse).	GN=Aatk	A6BLY8_MOUSE	0	5	5	N/A
Apoptosis-inducing factor 1	GN=Aifm1	AIFM1_MOUSE	6	7	13	-0.222392
Apoptotic peptidase activating factor 1 AC=A2RRK8 OS=Mus musculus (Mouse).	GN=Apaf1	A2RRK8_MOUSE	11	16	27	-0.540568
Aquarius	GN=Aqr	A2AQA6_MOUSE	3	2	5	0.584963
Arachidonate 15-lipoxygenase AC=A2CF88 OS=Mus musculus (Mouse).	GN=Alox15	A2CF88_MOUSE	12	0	12	N/A
Arachidonate 5-lipoxygenase-activating protein	GN=Alox5ap	AL5AP_MOUSE	4	3	7	0.415037
A-Raf proto-oncogene serine/threonine-protein kinase AC=P04627 OS=Mus musculus (Mouse).	GN=Araf	ARAF_MOUSE	1	2	3	-1
Arf-GAP domain and FG repeats-containing protein 1	GN=Agfg1	AGFG1_MOUSE	2	4	6	-1
ARFGAP with coiled-coil	GN=Acap1	ACAP1_MOUSE	7	11	18	-0.652077
ARFGAP with coiled-coil	GN=Acap2	ACAP2_MOUSE	9	8	17	0.169925
Arf-GAP with SH3 domain	GN=Asap1	ASAP1_MOUSE	2	7	9	-1.80735
Arf-GAP1	GN=Arap1	ARAP1_MOUSE	3	12	15	-2
Arf-GAP3	GN=Arap3	ARAP3_MOUSE	7	13	20	-0.893085
Arfip1 protein AC=A2RSX9 OS=Mus musculus (Mouse).	GN=Arfip1	A2RSX9_MOUSE	1	3	4	-1.58496
Arginase-1	GN=Arg1	ARGI1_MOUSE	9	0	9	N/A
Argininosuccinate lyase	GN=Asl	ARLY_MOUSE	5	6	11	-0.263034
Argininosuccinate synthase	GN=Ass1	ASSY_MOUSE	4	3	7	0.415037
Arhgap1 protein AC=Q91Z04 OS=Mus musculus (Mouse).	GN=Arhgap1	Q91Z04_MOUSE	5	11	16	-1.1375
ArhGAP9 AC=Q1HDU4 OS=Mus musculus (Mouse).	GN=Arhgap9	Q1HDU4_MOUSE	6	4	10	0.584963
Armadillo repeat containing 4	GN=Armc4	B2RY50_MOUSE	3	3	6	0
Armadillo repeat-containing protein 10 AC=Q9D0L7 OS=Mus musculus (Mouse).	GN=Armc10	ARM10_MOUSE	3	2	5	0.584963
Ars2 protein AC=Q5D042 OS=Mus musculus (Mouse).	GN=Ars2	Q5D042_MOUSE	9	7	16	0.36257
Arsenic (+3 oxidation state) methyltransferase AC=A6H5W4 OS=Mus musculus (Mouse).	GN=As3mt	A6H5W4_MOUSE	3	5	8	-0.736966
Arsenical pump-driving ATPase	GN=Asna1	ARSA1_MOUSE	6	4	10	0.584963
Arylacetamide deacetylase-like 1	GN=Aadacl1	ADCL1_MOUSE	6	4	10	0.584963
Arylsulfatase B	GN=Arsb	ARSB_MOUSE	6	11	17	-0.874469
Asparagine synthetase [glutamine-hydrolyzing]	GN=Asns	ASNS_MOUSE	6	5	11	0.263034
Asparaginyl-tRNA synthetase	GN=Nars	SYNC_MOUSE	11	9	20	0.289507
Aspartate aminotransferase	GN=Got2	AATM_MOUSE	23	14	37	0.716207
Aspartyl aminopeptidase AC=Q9Z2W0 OS=Mus musculus (Mouse).	GN=Dnpep	DNPEP_MOUSE	4	7	11	-0.807355
Aspartylglucosaminidase	GN=Aga	A2RSS6_MOUSE	1	3	4	-1.58496
AT rich interactive domain 1A (Swi1 like) AC=A2BH40 OS=Mus musculus (Mouse).	GN=Arid1a	A2BH40_MOUSE	4	4	8	0
Ataxin-10	GN=Atxn10	ATX10_MOUSE	7	11	18	-0.652077
Ataxin-2-like protein AC=Q7TQH0 OS=Mus musculus (Mouse).	GN=Atxn2l	ATX2L_MOUSE	4	2	6	1
AT-hook-containing transcription factor AC=Q80VW7 OS=Mus musculus (Mouse).	GN=Akna	AKNA_MOUSE	1	3	4	-1.58496
Atlastin-2	GN=Atl2	ATLA2_MOUSE	6	2	8	1.58496
Atlastin-3 AC=Q91YH5 OS=Mus musculus (Mouse).	GN=Atl3	ATLA3_MOUSE	12	11	23	0.125531
ATP synthase gamma chain AC=A2AKU9 OS=Mus musculus (Mouse).	GN=Atp5c1	A2AKU9_MOUSE	7	2	9	1.80735
ATP synthase subunit b	GN=Atp5f1	AT5F1_MOUSE	6	4	10	0.584963
ATP synthase subunit d	GN=Atp5h	ATP5H_MOUSE	12	12	24	0
ATP synthase subunit g	GN=Atp5l	ATP5L_MOUSE	3	5	8	-0.736966
ATP synthase subunit O	GN=Atp5o	ATPO_MOUSE	11	8	19	0.459432
ATP synthase-coupling factor 6	GN=Atp5j	ATP5J_MOUSE	2	3	5	-0.584963
Atp8a1 protein AC=A1L332 OS=Mus musculus (Mouse).	GN=Atp8a1	A1L332_MOUSE	2	3	5	-0.584963
ATPase	GN=Atp11b	Q6DFW5_MOUSE	9	7	16	0.36257
ATPase	GN=Atp6v0a1	A2A5A0_MOUSE	8	2	10	2
ATPase	GN=Atp6v1g1	Q5HZY7_MOUSE	6	5	11	0.263034
ATPase family	GN=Atad3a	A2AD89_MOUSE	6	2	8	1.58496
ATP-binding cassette	GN=Abcb7	A2AC46_MOUSE	4	3	7	0.415037
ATP-binding cassette	GN=Abcd1	A2ALM9_MOUSE	3	2	5	0.584963
ATP-binding cassette sub-family A member 13 AC=Q5SSE9 OS=Mus musculus (Mouse).	GN=Abca13	ABCAD_MOUSE	3	8	11	-1.41504
ATP-binding cassette sub-family D member 2	GN=Abcd2	ABCD2_MOUSE	3	2	5	0.584963
ATP-binding cassette sub-family D member 3	GN=Abcd3	ABCD3_MOUSE	2	3	5	-0.584963
ATP-binding cassette sub-family E member 1	GN=Abce1	ABCE1_MOUSE	9	11	20	-0.289507
ATP-binding cassette sub-family F member 1 AC=Q6P542 OS=Mus musculus (Mouse).	GN=Abcf1	ABCF1_MOUSE	2	2	4	0
ATP-dependent DNA helicase 2 subunit 2	GN=Xrcc5	KU86_MOUSE	3	3	6	0
ATP-dependent RNA helicase DDX1	GN=Ddx1	DDX1_MOUSE	14	15	29	-0.0995357
ATP-dependent RNA helicase DDX19A	GN=Ddx19a	DD19A_MOUSE	8	6	14	0.415037
ATP-dependent RNA helicase DDX42	GN=Ddx42	DDX42_MOUSE	5	1	6	2.32193
ATP-dependent RNA helicase DDX54	GN=Ddx54	DDX54_MOUSE	3	0	3	N/A
ATP-dependent RNA helicase Dhx29	GN=Dhx29	DHX29_MOUSE	4	4	8	0
AT-rich interactive domain-containing protein 3A	GN=Arid3a	ARI3A_MOUSE	6	9	15	-0.584963
AU042671 protein AC=Q6PDJ9 OS=Mus musculus (Mouse).	GN=AU042671	Q6PDJ9_MOUSE	0	4	4	N/A
Autocrine motility factor receptor AC=Q9R049 OS=Mus musculus (Mouse).	GN=Amfr	AMFR_MOUSE	1	3	4	-1.58496
Autophagy-related protein 3	GN=Atg3	ATG3_MOUSE	3	7	10	-1.22239
Autophagy-related protein 7	GN=Atg7	ATG7_MOUSE	6	12	18	-1
BAG family molecular chaperone regulator 1	GN=Bag1	BAG1_MOUSE	2	3	5	-0.584963
BAG family molecular chaperone regulator 5	GN=Bag5	BAG5_MOUSE	4	0	4	N/A
Barrier-to-autointegration factor	GN=Banf1	BAF_MOUSE	18	7	25	1.36257
Basic leucine zipper and W2 domain-containing protein 1 AC=Q9CQC6 OS=Mus musculus (Mouse).	GN=Bzw1	BZW1_MOUSE	7	9	16	-0.36257
Basic leucine zipper and W2 domain-containing protein 2 AC=Q91VK1 OS=Mus musculus (Mouse).	GN=Bzw2	BZW2_MOUSE	2	3	5	-0.584963
Basic transcription factor 3-like 4	GN=Btf3l4	A2A7Z4_MOUSE	6	3	9	1
BAT2 domain-containing protein 1 AC=Q80TK3 OS=Mus musculus (Mouse).	GN=Bat2d1	BA2D1_MOUSE	2	1	3	1
Baz2b protein AC=B9EKB5 OS=Mus musculus (Mouse).	GN=Baz2b	B9EKB5_MOUSE	3	0	3	N/A
B-cell receptor-associated protein 31	GN=Bcap31	A2ALM8_MOUSE	6	3	9	1
Bcl-2 homologous antagonist/killer	GN=Bak1	BAK_MOUSE	2	3	5	-0.584963
Bcl-2-associated transcription factor 1 AC=Q8K019 OS=Mus musculus (Mouse).	GN=Bclaf1	BCLF1_MOUSE	8	7	15	0.192645
Bcl-2-like protein 13	GN=Bcl2l13	B2L13_MOUSE	4	0	4	N/A
Beta-1	GN=B4galnt1	B4GN1_MOUSE	9	3	12	1.58496
Beta-1	GN=B4galt1	B4GT1_MOUSE	2	2	4	0
Beta-2-globin AC=Q54AH9 OS=Mus musculus (Mouse).	GN=Hbb	Q54AH9_MOUSE	66	2	68	5.04439
Beta-2-microglobulin AC=P01887 OS=Mus musculus (Mouse).	GN=B2m	B2MG_MOUSE	4	1	5	2
Beta-arrestin-1	GN=Arrb1	ARRB1_MOUSE	2	4	6	-1
Beta-arrestin-2	GN=Arrb2	ARRB2_MOUSE	12	15	27	-0.321928
Beta-galactosidase	GN=Glb1	BGAL_MOUSE	5	6	11	-0.263034
Beta-globin AC=A8DUK0 OS=Mus musculus (Mouse).	GN=Hbb-b1	A8DUK0_MOUSE	79	3	82	4.71882
Beta-glucuronidase AC=P12265 OS=Mus musculus (Mouse).	GN=Gusb	BGLR_MOUSE	7	8	15	-0.192645
BH3-interacting domain death agonist	GN=Bid	BID_MOUSE	8	12	20	-0.584963
Bifunctional ATP-dependent dihydroxyacetone kinase/FAD-AMP lyase (cyclizing)	GN=Dak	DHAK_MOUSE	4	4	8	0
Bifunctional methylenetetrahydrofolate dehydrogenase/cyclohydrolase	GN=Mthfd2	MTDC_MOUSE	2	1	3	1
Bifunctional polynucleotide phosphatase/kinase	GN=Pnkp	PNKP_MOUSE	9	17	26	-0.917538
Biliverdin reductase A AC=A2ASB2 OS=Mus musculus (Mouse).	GN=Blvra	A2ASB2_MOUSE	2	2	4	0
Biogenesis of lysosome-related organelles complex 1 subunit 3	GN=Bloc1s3	BL1S3_MOUSE	0	3	3	N/A
BMP-2-inducible protein kinase AC=Q91Z96 OS=Mus musculus (Mouse).	GN=Bmp2k	BMP2K_MOUSE	2	0	2	N/A
BMX non-receptor tyrosine kinase AC=B1AUL5 OS=Mus musculus (Mouse).	GN=Bmx	B1AUL5_MOUSE	1	3	4	-1.58496
BolA-like protein 1 AC=Q9D8S9 OS=Mus musculus (Mouse).	GN=Bola1	BOLA1_MOUSE	3	0	3	N/A
Bone marrow proteoglycan	GN=Prg2	PRG2_MOUSE	17	1	18	4.08746
Brain acid soluble protein 1	GN=Basp1	BASP_MOUSE	2	7	9	-1.80735
Brain protein 44 AC=Q9D023 OS=Mus musculus (Mouse).	GN=Brp44	BR44_MOUSE	3	2	5	0.584963
Branched-chain-amino-acid aminotransferase	GN=Bcat2	BCAT2_MOUSE	5	3	8	0.736966
BRCA1-A complex subunit BRE	GN=Bre	BRE_MOUSE	3	4	7	-0.415037
BRI3-binding protein AC=Q8BXV2 OS=Mus musculus (Mouse).	GN=Bri3bp	BRI3B_MOUSE	2	1	3	1
Bromodomain adjacent to zinc finger domain protein 1A	GN=Baz1a	BAZ1A_MOUSE	5	4	9	0.321928
Bromodomain containing 4	GN=Brd4	B0V2V7_MOUSE	4	5	9	-0.321928
Bruton agammaglobulinemia tyrosine kinase AC=A2BDV9 OS=Mus musculus (Mouse).	GN=Btk	A2BDV9_MOUSE	5	10	15	-1
BSD domain-containing protein 1 AC=Q80Y55 OS=Mus musculus (Mouse).	GN=Bsdc1	BSDC1_MOUSE	1	3	4	-1.58496
BTB/POZ domain-containing protein KCTD12	GN=Kctd12	KCD12_MOUSE	9	8	17	0.169925
C-1-tetrahydrofolate synthase	GN=Mthfd1	C1TC_MOUSE	10	13	23	-0.378512
C230096C10Rik protein AC=A1L2Z3 OS=Mus musculus (Mouse).	GN=C230096C10Rik	A1L2Z3_MOUSE	5	3	8	0.736966
Calcium homeostasis endoplasmic reticulum protein	GN=Cherp	CHERP_MOUSE	4	1	5	2
Calcium/calmodulin-dependent protein kinase type II delta chain AC=Q6PHZ2 OS=Mus musculus (Mouse).	GN=Camk2d	KCC2D_MOUSE	7	1	8	2.80735
Calcium/calmodulin-dependent protein kinase type II gamma chain AC=Q923T9 OS=Mus musculus (Mouse).	GN=Camk2g	KCC2G_MOUSE	7	5	12	0.485427
Calcium-binding atopy-related autoantigen 1 AC=Q8VCX5 OS=Mus musculus (Mouse).	GN=Cbara1	CBAA1_MOUSE	5	3	8	0.736966
Calcium-binding mitochondrial carrier protein SCaMC-1	GN=Slc25a24	SCMC1_MOUSE	16	12	28	0.415037
Calcium-binding protein 39	GN=Cab39	CAB39_MOUSE	5	12	17	-1.26303
Calcium-regulated heat stable protein 1	GN=Carhsp1	CHSP1_MOUSE	4	4	8	0
Calcyclin-binding protein	GN=Cacybp	CYBP_MOUSE	2	3	5	-0.584963
Calpain small subunit 1	GN=Capns1	CPNS1_MOUSE	4	5	9	-0.321928
Calpain-2 catalytic subunit	GN=Capn2	CAN2_MOUSE	3	0	3	N/A
Calponin-2	GN=Cnn2	CNN2_MOUSE	18	17	35	0.0824622
Calumenin	GN=Calu	CALU_MOUSE	8	8	16	0
cAMP-dependent protein kinase catalytic subunit alpha AC=P05132 OS=Mus musculus (Mouse).	GN=Prkaca	KAPCA_MOUSE	2	3	5	-0.584963
cAMP-dependent protein kinase type II-alpha regulatory subunit AC=P12367 OS=Mus musculus (Mouse).	GN=Prkar2a	KAP2_MOUSE	2	1	3	1
Canopy 3 homolog (Zebrafish)	GN=Cnpy3	B0V2V2_MOUSE	3	1	4	1.58496
CAP-Gly domain-containing linker protein 1	GN=Clip1	CLIP1_MOUSE	4	11	15	-1.45943
CAP-Gly domain-containing linker protein 2	GN=Clip2	CLIP2_MOUSE	0	2	2	N/A
Caprin-1	GN=Caprin1	CAPR1_MOUSE	5	5	10	0
Capz-interacting protein	GN=Rcsd1	CPZIP_MOUSE	5	11	16	-1.1375
Carbamoyl-phosphate synthetase 2	GN=Cad	B2RQC6_MOUSE	13	10	23	0.378512
Carbohydrate kinase domain-containing protein AC=Q9CZ42 OS=Mus musculus (Mouse).	GN=Carkd	CARKD_MOUSE	4	1	5	2
Carbohydrate sulfotransferase 12	GN=Chst12	CHSTC_MOUSE	3	6	9	-1
Carbonic anhydrase 2	GN=Ca2	CAH2_MOUSE	3	1	4	1.58496
Carbonyl reductase [NADPH] 2	GN=Cbr2	CBR2_MOUSE	9	0	9	N/A
Carbonyl reductase 3	GN=Cbr3	Q8K354_MOUSE	5	0	5	N/A
Carboxypeptidase D	GN=Cpd	CBPD_MOUSE	1	2	3	-1
Carcinoembryonic antigen-related cell adhesion molecule 10 AC=Q61400 OS=Mus musculus (Mouse).	GN=Ceacam10	CEAMA_MOUSE	1	3	4	-1.58496
Carnitine O-palmitoyltransferase 1	GN=Cpt1a	CPT1A_MOUSE	5	4	9	0.321928
Carnitine O-palmitoyltransferase 2	GN=Cpt2	CPT2_MOUSE	5	1	6	2.32193
Casein kinase I isoform gamma-2 AC=Q8BVP5 OS=Mus musculus (Mouse).	GN=Csnk1g2	KC1G2_MOUSE	1	1	2	0
Casein kinase I isoform gamma-3 AC=Q8C4X2 OS=Mus musculus (Mouse).	GN=Csnk1g3	KC1G3_MOUSE	2	1	3	1
Casein kinase II subunit beta	GN=Csnk2b	CSK2B_MOUSE	5	4	9	0.321928
Caspase recruitment domain family	GN=Card9	A2AIV8_MOUSE	5	8	13	-0.678072
Caspase-1	GN=Casp1	CASP1_MOUSE	9	5	14	0.847997
Caspase-3	GN=Casp3	CASP3_MOUSE	0	5	5	N/A
Caspase-7	GN=Casp7	CASP7_MOUSE	4	6	10	-0.584963
Caspase-8	GN=Casp8	CASP8_MOUSE	4	1	5	2
Catalase AC=P24270 OS=Mus musculus (Mouse).	GN=Cat	CATA_MOUSE	14	5	19	1.48543
Catechol-O-methyltransferase 1	GN=Comt1	Q91XH4_MOUSE	3	1	4	1.58496
Catenin	GN=Ctnnbl1	A2ACD3_MOUSE	5	5	10	0
Catenin alpha-1	GN=Ctnna1	CTNA1_MOUSE	3	1	4	1.58496
Catenin delta-1	GN=Ctnnd1	CTND1_MOUSE	3	3	6	0
Cathelin-related antimicrobial peptide	GN=Camp	CRAMP_MOUSE	34	26	60	0.387023
Cathepsin B	GN=Ctsb	CATB_MOUSE	46	15	61	1.61667
Cathepsin B AC=Q6LAF6 OS=Mus musculus (Mouse).	GN=Ctsb	Q6LAF6_MOUSE	33	13	46	1.34395
Cathepsin D AC=P18242 OS=Mus musculus (Mouse).	GN=Ctsd	CATD_MOUSE	15	11	26	0.447459
Cathepsin G	GN=Ctsg	CATG_MOUSE	47	45	92	0.0627358
Cathepsin H	GN=Ctsh	CATH_MOUSE	8	2	10	2
Cathepsin S AC=O70370 OS=Mus musculus (Mouse).	GN=Ctss	CATS_MOUSE	8	2	10	2
Cathepsin Z AC=Q9WUU7 OS=Mus musculus (Mouse).	GN=Ctsz	CATZ_MOUSE	12	5	17	1.26303
Cation-dependent mannose-6-phosphate receptor	GN=M6pr	MPRD_MOUSE	7	1	8	2.80735
CCAAT/enhancer-binding protein epsilon AC=Q6PZD9 OS=Mus musculus (Mouse).	GN=Cebpe	CEBPE_MOUSE	5	4	9	0.321928
CCAAT/enhancer-binding protein zeta	GN=Cebpz	CEBPZ_MOUSE	5	0	5	N/A
CCR4-NOT transcription complex subunit 10 AC=Q8BH15 OS=Mus musculus (Mouse).	GN=Cnot10	CNOTA_MOUSE	2	2	4	0
CD2-associated protein AC=B2RRE8 OS=Mus musculus (Mouse).	GN=Cd2ap	B2RRE8_MOUSE	4	0	4	N/A
CD300 antigen like family member F AC=A2A6Z2 OS=Mus musculus (Mouse).	GN=Cd300lf	A2A6Z2_MOUSE	3	4	7	-0.415037
CD44 antigen AC=A2APM1 OS=Mus musculus (Mouse).	GN=Cd44	A2APM1_MOUSE	12	6	18	1
CD97 antigen AC=Q9Z0M6 OS=Mus musculus (Mouse).	GN=Cd97	CD97_MOUSE	9	8	17	0.169925
Cd97 protein AC=Q4FJS6 OS=Mus musculus (Mouse).	GN=Cd97	Q4FJS6_MOUSE	10	7	17	0.514573
CD98 heavy chain AC=Q60849 OS=Mus musculus (Mouse).	GN=Slc3a2	Q60849_MOUSE	10	1	11	3.32193
CDGSH iron sulfur domain-containing protein 2	GN=Cisd2	CISD2_MOUSE	4	1	5	2
CDK5 regulatory subunit associated protein 3	GN=Cdk5rap3	A2A6E3_MOUSE	2	1	3	1
CDKN2A-interacting protein	GN=Cdkn2aip	CARF_MOUSE	4	3	7	0.415037
CDW13/WDR61	GN=Wdr61	A0MNP4_MOUSE	4	3	7	0.415037
CEA-related cell adhesion molecule 1	GN=Ceacam1	Q3LFS9_MOUSE	4	2	6	1
Cell cycle control protein 50A	GN=Tmem30a	CC50A_MOUSE	3	1	4	1.58496
Cell division cycle 2-like 1	GN=Cdc2l1	A2A9P5_MOUSE	3	4	7	-0.415037
Cell division cycle 40 homolog (Yeast)	GN=Cdc40	B2RY33_MOUSE	3	1	4	1.58496
Cell division cycle 5-related protein	GN=Cdc5l	CDC5L_MOUSE	5	9	14	-0.847997
Cell division cycle and apoptosis regulator protein 1	GN=Ccar1	CCAR1_MOUSE	3	4	7	-0.415037
Centrin-2	GN=Cetn2	CETN2_MOUSE	3	1	4	1.58496
Centromere/kinetochore protein zw10 homolog AC=O54692 OS=Mus musculus (Mouse).	GN=Zw10	ZW10_MOUSE	4	2	6	1
Cep110 protein AC=B2RXX1 OS=Mus musculus (Mouse).	GN=Cep110	B2RXX1_MOUSE	5	3	8	0.736966
Ceruloplasmin	GN=Cp	CERU_MOUSE	4	0	4	N/A
Charged multivesicular body protein 3	GN=Vps24	CHMP3_MOUSE	2	2	4	0
Chemokine subfamily B Cys-X-Cys	GN=Ppbp	Q9EQI5_MOUSE	4	0	4	N/A
Choline dehydrogenase	GN=Chdh	CHDH_MOUSE	9	5	14	0.847997
Choline transporter-like protein 2	GN=Slc44a2	CTL2_MOUSE	2	3	5	-0.584963
Choline-phosphate cytidylyltransferase A	GN=Pcyt1a	PCY1A_MOUSE	2	5	7	-1.32193
Chorein AC=A1ILG8 OS=Mus musculus (Mouse).	GN=Vps13c	A1ILG8_MOUSE	8	2	10	2
Chromatin modifying protein 4B AC=A2AVM1 OS=Mus musculus (Mouse).	GN=Chmp4b	A2AVM1_MOUSE	2	1	3	1
Chromatin modifying protein 5	GN=Chmp5	B1AY07_MOUSE	0	4	4	N/A
Chromodomain-helicase-DNA-binding protein 7	GN=Chd7	CHD7_MOUSE	2	0	2	N/A
Chromodomain-helicase-DNA-binding protein 8	GN=Chd8	CHD8_MOUSE	2	0	2	N/A
Cisplatin resistance-associated overexpressed protein AC=Q5SUF2 OS=Mus musculus (Mouse).	GN=Crop	CROP_MOUSE	3	3	6	0
Citrate synthase	GN=Cs	CISY_MOUSE	14	11	25	0.347923
Citron Rho-interacting kinase	GN=Cit	CTRO_MOUSE	3	1	4	1.58496
Clasp1 protein AC=B2RY22 OS=Mus musculus (Mouse).	GN=Clasp1	B2RY22_MOUSE	8	5	13	0.678072
Clasp2 protein AC=B9EJA4 OS=Mus musculus (Mouse).	GN=Clasp2	B9EJA4_MOUSE	4	3	7	0.415037
Clathrin light polypeptide (Lca) AC=B1AWE0 OS=Mus musculus (Mouse).	GN=Clta	B1AWE0_MOUSE	3	0	3	N/A
Cleavage and polyadenylation specificity factor subunit 2	GN=Cpsf2	CPSF2_MOUSE	3	2	5	0.584963
Cleavage and polyadenylation specificity factor subunit 6 AC=Q6NVF9 OS=Mus musculus (Mouse).	GN=Cpsf6	CPSF6_MOUSE	12	8	20	0.584963
Cleavage and polyadenylation specificity factor subunit 7 AC=Q8BTV2 OS=Mus musculus (Mouse).	GN=Cpsf7	CPSF7_MOUSE	8	3	11	1.41504
Cleavage stimulation factor	GN=Cstf2	A2AEJ9_MOUSE	4	1	5	2
Cleavage stimulation factor	GN=Cstf1	A2AP97_MOUSE	2	2	4	0
Cleavage stimulation factor 64 kDa subunit	GN=Cstf2t	CSTFT_MOUSE	1	1	2	0
Clec4a2 protein	GN=Clec4a2	Q923C7_MOUSE	1	2	3	-1
Cleft lip and palate transmembrane protein 1 homolog	GN=Clptm1	CLPT1_MOUSE	3	2	5	0.584963
Clk2-Scamp3 protein AC=B2M0S2 OS=Mus musculus (Mouse).	GN=Tu52	B2M0S2_MOUSE	4	4	8	0
Clusterin	GN=Clu	CLUS_MOUSE	3	1	4	1.58496
Cnot1 protein AC=B2RXR3 OS=Mus musculus (Mouse).	GN=Cnot1	B2RXR3_MOUSE	9	14	23	-0.63743
Coactosin-like protein AC=Q9CQI6 OS=Mus musculus (Mouse).	GN=Cotl1	COTL1_MOUSE	37	49	86	-0.405256
Coagulation factor XIII A chain	GN=F13a1	F13A_MOUSE	13	7	20	0.893085
Coatomer subunit beta'	GN=Copb2	COPB2_MOUSE	11	10	21	0.137504
Coatomer subunit epsilon	GN=Cope	COPE_MOUSE	8	6	14	0.415037
Cofactor of BRCA1	GN=Cobra1	A2AHZ8_MOUSE	4	3	7	0.415037
Coiled-coil domain containing 22 AC=B1AVA1 OS=Mus musculus (Mouse).	GN=Ccdc22	B1AVA1_MOUSE	2	1	3	1
Coiled-coil domain containing 43 AC=A2AG05 OS=Mus musculus (Mouse).	GN=Ccdc43	A2AG05_MOUSE	1	2	3	-1
Coiled-coil domain containing 88B AC=B2RX63 OS=Mus musculus (Mouse).	GN=Ccdc88b	B2RX63_MOUSE	12	14	26	-0.222392
Coiled-coil domain-containing protein 109A AC=Q3UMR5 OS=Mus musculus (Mouse).	GN=Ccdc109a	C109A_MOUSE	3	7	10	-1.22239
Coiled-coil domain-containing protein 115 AC=Q8VE99 OS=Mus musculus (Mouse).	GN=Ccdc115	CC115_MOUSE	3	1	4	1.58496
Coiled-coil domain-containing protein 47	GN=Ccdc47	CC47_MOUSE	5	2	7	1.32193
Coiled-coil domain-containing protein 58 AC=Q8R3Q6 OS=Mus musculus (Mouse).	GN=Ccdc58	CCD58_MOUSE	2	2	4	0
Coiled-coil-helix-coiled-coil-helix domain-containing protein 3	GN=Chchd3	CHCH3_MOUSE	2	2	4	0
Coiled-coil-helix-coiled-coil-helix domain-containing protein 6 AC=Q91VN4 OS=Mus musculus (Mouse).	GN=Chchd6	CHCH6_MOUSE	2	1	3	1
Cold shock domain-containing protein E1 AC=Q91W50 OS=Mus musculus (Mouse).	GN=Csde1	CSDE1_MOUSE	10	1	11	3.32193
COMM domain containing 1	GN=Commd1	A2RSF1_MOUSE	0	3	3	N/A
COMM domain-containing protein 2 AC=Q8BXC6 OS=Mus musculus (Mouse).	GN=Commd2	COMD2_MOUSE	2	1	3	1
COMM domain-containing protein 7 AC=Q8BG94 OS=Mus musculus (Mouse).	GN=Commd7	COMD7_MOUSE	2	2	4	0
Complement component 1	GN=C1qbp	Q8R5L1_MOUSE	16	8	24	1
Complement factor properdin AC=A2AE15 OS=Mus musculus (Mouse).	GN=Cfp	A2AE15_MOUSE	7	6	13	0.222392
Complement regulatory protein Crry	GN=Crry	CRRY_MOUSE	2	1	3	1
Condensin complex subunit 1	GN=Ncapd2	CND1_MOUSE	15	9	24	0.736966
Condensin-2 complex subunit G2	GN=Ncapg2	CNDG2_MOUSE	1	2	3	-1
Conserved oligomeric Golgi complex subunit 2	GN=Cog2	COG2_MOUSE	2	1	3	1
Conserved oligomeric Golgi complex subunit 7	GN=Cog7	COG7_MOUSE	1	4	5	-2
Constitutive coactivator of PPAR-gamma-like protein 1	GN=FAM120A	F120A_MOUSE	6	5	11	0.263034
COP9 (Constitutive photomorphogenic) homolog	GN=Cops2	A2AQE3_MOUSE	9	2	11	2.16993
COP9 signalosome complex subunit 3	GN=Cops3	CSN3_MOUSE	5	4	9	0.321928
COP9 signalosome complex subunit 4	GN=Cops4	CSN4_MOUSE	5	7	12	-0.485427
COP9 signalosome complex subunit 5	GN=Cops5	CSN5_MOUSE	4	3	7	0.415037
COP9 signalosome complex subunit 6	GN=Cops6	CSN6_MOUSE	3	2	5	0.584963
COP9 signalosome complex subunit 7b	GN=Cops7b	CSN7B_MOUSE	0	4	4	N/A
Copper transport protein ATOX1	GN=Atox1	ATOX1_MOUSE	4	5	9	-0.321928
Coproporphyrinogen-III oxidase	GN=Cpox	HEM6_MOUSE	3	0	3	N/A
Core histone macro-H2A.1	GN=H2afy	H2AY_MOUSE	30	35	65	-0.222392
Core-binding factor subunit beta	GN=Cbfb	PEBB_MOUSE	4	6	10	-0.584963
Coronin	GN=Coro1b	A2RS22_MOUSE	13	12	25	0.115477
Corticosteroid 11-beta-dehydrogenase isozyme 1	GN=Hsd11b1	DHI1_MOUSE	5	3	8	0.736966
Creatine kinase B-type	GN=Ckb	KCRB_MOUSE	6	0	6	N/A
CREB-binding protein AC=P45481 OS=Mus musculus (Mouse).	GN=Crebbp	CBP_MOUSE	4	3	7	0.415037
C-src tyrosine kinase	GN=Csk	Q8VCW1_MOUSE	5	7	12	-0.485427
CTD small phosphatase-like protein 2 AC=Q8CEG6 OS=Mus musculus (Mouse).	GN=Ctdspl2	CTSL2_MOUSE	2	2	4	0
C-terminal-binding protein 1 AC=O88712 OS=Mus musculus (Mouse).	GN=Ctbp1	CTBP1_MOUSE	10	5	15	1
C-terminal-binding protein 2 AC=P56546 OS=Mus musculus (Mouse).	GN=Ctbp2	CTBP2_MOUSE	7	3	10	1.22239
C-type lectin domain family 12 member A	GN=Clec12a	CL12A_MOUSE	3	4	7	-0.415037
C-type lectin domain family 5 member A	GN=Clec5a	CLC5A_MOUSE	5	7	12	-0.485427
C-type lectin domain family 7 member A	GN=Clec7a	CLC7A_MOUSE	3	1	4	1.58496
CUG-BP- and ETR-3-like factor 2	GN=Cugbp2	CELF2_MOUSE	8	6	14	0.415037
Cullin 4B AC=A2A432 OS=Mus musculus (Mouse).	GN=Cul4b	A2A432_MOUSE	1	6	7	-2.58496
Cullin-2 AC=Q9D4H8 OS=Mus musculus (Mouse).	GN=Cul2	CUL2_MOUSE	0	3	3	N/A
Cutaneous T-cell lymphoma-associated antigen 5 homolog	GN=Ctage5	CTGE5_MOUSE	4	3	7	0.415037
CWF19-like protein 1 AC=Q8CI33 OS=Mus musculus (Mouse).	GN=Cwf19l1	C19L1_MOUSE	1	2	3	-1
Cyclic AMP-responsive element-binding protein 1 AC=Q01147 OS=Mus musculus (Mouse).	GN=Creb1	CREB1_MOUSE	3	0	3	N/A
Cyclin G-associated kinase AC=Q99KY4 OS=Mus musculus (Mouse).	GN=Gak	GAK_MOUSE	7	5	12	0.485427
Cyclin-dependent kinase inhibitor 1B	GN=Cdkn1b	CDN1B_MOUSE	4	3	7	0.415037
Cystatin C	GN=Cst3	A2APX2_MOUSE	3	5	8	-0.736966
Cysteine and glycine-rich protein 1 AC=P97315 OS=Mus musculus (Mouse).	GN=Csrp1	CSRP1_MOUSE	4	5	9	-0.321928
Cysteine and histidine-rich domain-containing protein 1	GN=Chordc1	CHRD1_MOUSE	5	4	9	0.321928
Cysteine protease ATG4B	GN=Atg4b	ATG4B_MOUSE	2	2	4	0
Cysteine-rich secretory protein LCCL domain-containing 2	GN=Crispld2	CRLD2_MOUSE	8	10	18	-0.321928
Cysteine-rich with EGF-like domain protein 2 AC=Q9CYA0 OS=Mus musculus (Mouse).	GN=Creld2	CREL2_MOUSE	4	4	8	0
Cytidine 5'-triphosphate synthase 2 AC=A2AEQ6 OS=Mus musculus (Mouse).	GN=Ctps2	A2AEQ6_MOUSE	2	4	6	-1
Cytochrome b-245	GN=Cyba	B3VQI8_MOUSE	7	9	16	-0.36257
Cytochrome b5 type B	GN=Cyb5b	CYB5B_MOUSE	6	4	10	0.584963
Cytochrome b-c1 complex subunit 2	GN=Uqcrc2	QCR2_MOUSE	12	12	24	0
Cytochrome b-c1 complex subunit Rieske	GN=Uqcrfs1	UCRI_MOUSE	8	3	11	1.41504
Cytochrome c	GN=Cycs	CYC_MOUSE	12	6	18	1
Cytochrome c oxidase polypeptide 7A2	GN=Cox7a2	CX7A2_MOUSE	4	2	6	1
Cytochrome c oxidase subunit 2 AC=A3E4B0 OS=Mus musculus musculus (eastern European house mouse).	GN=COX2	A3E4B0_MOUSE	6	2	8	1.58496
Cytochrome c oxidase subunit 5A	GN=Cox5a	COX5A_MOUSE	8	7	15	0.192645
Cytochrome c oxidase subunit 5B	GN=Cox5b	COX5B_MOUSE	5	2	7	1.32193
Cytochrome c oxidase subunit 6B1	GN=Cox6b1	CX6B1_MOUSE	10	3	13	1.73697
Cytochrome c oxidase subunit 6C	GN=Cox6c	COX6C_MOUSE	4	4	8	0
Cytochrome c oxidase subunit IV isoform 1	GN=Cox4i1	A2RSV8_MOUSE	13	7	20	0.893085
Cytochrome c1	GN=Cyc1	CY1_MOUSE	6	8	14	-0.415037
Cytochrome c-type heme lyase	GN=Hccs	CCHL_MOUSE	3	2	5	0.584963
Cytohesin 1	GN=Cyth1	A2A517_MOUSE	1	2	3	-1
Cytohesin 1 interacting protein AC=A2AS77 OS=Mus musculus (Mouse).	GN=Cytip	A2AS77_MOUSE	2	2	4	0
Cytohesin-4	GN=Cyth4	CYH4_MOUSE	5	3	8	0.736966
Cytokine receptor-like factor 3	GN=Crlf3	CRLF3_MOUSE	7	8	15	-0.192645
Cytoplasmic aconitate hydratase	GN=Aco1	ACOC_MOUSE	4	7	11	-0.807355
Cytoplasmic dynein 1 light intermediate chain 1	GN=Dync1li1	DC1L1_MOUSE	10	11	21	-0.137504
Cytoskeleton-associated protein 5 AC=Q9CUN0 OS=Mus musculus (Mouse).	GN=Ckap5	CKAP5_MOUSE	5	10	15	-1
Cytosol aminopeptidase	GN=Lap3	AMPL_MOUSE	11	5	16	1.1375
Cytosolic 5'-nucleotidase 3	GN=Nt5c3	5NT3_MOUSE	9	9	18	0
Cytosolic acyl coenzyme A thioester hydrolase	GN=Acot7	BACH_MOUSE	6	3	9	1
Cytosolic phospholipase A2	GN=Pla2g4a	PA24A_MOUSE	2	3	5	-0.584963
Cytosolic purine 5'-nucleotidase	GN=Nt5c2	5NTC_MOUSE	10	9	19	0.152003
D-2-hydroxyglutarate dehydrogenase	GN=D2hgdh	D2HDH_MOUSE	2	2	4	0
D-3-phosphoglycerate dehydrogenase	GN=Phgdh	SERA_MOUSE	13	10	23	0.378512
DAZ-associated protein 1	GN=Dazap1	DAZP1_MOUSE	6	12	18	-1
DCC-interacting protein 13-alpha	GN=Appl1	DP13A_MOUSE	1	4	5	-2
Dci protein	GN=Dci	Q8QZV3_MOUSE	9	3	12	1.58496
DCN1-like protein 1	GN=Dcun1d1	DCNL1_MOUSE	3	3	6	0
D-dopachrome decarboxylase	GN=Ddt	DOPD_MOUSE	3	3	6	0
Ddx58 protein AC=A1L0V6 OS=Mus musculus (Mouse).	GN=Ddx58	A1L0V6_MOUSE	8	6	14	0.415037
Death-inducer obliterator 1	GN=Dido1	DIDO1_MOUSE	2	4	6	-1
Dedicator of cytokinesis protein 5	GN=Dock5	DOCK5_MOUSE	7	13	20	-0.893085
Dehydrogenase/reductase SDR family member 1 AC=Q99L04 OS=Mus musculus (Mouse).	GN=Dhrs1	DHRS1_MOUSE	9	10	19	-0.152003
Dehydrogenase/reductase SDR family member 4	GN=Dhrs4	DHRS4_MOUSE	3	1	4	1.58496
Dehydrogenase/reductase SDR family member 7	GN=Dhrs7	DHRS7_MOUSE	9	8	17	0.169925
Dehydrogenase/reductase SDR family member 9	GN=Dhrs9	DHRS9_MOUSE	1	2	3	-1
Delta(3,5)-Delta(2,4)-dienoyl-CoA isomerase, mitochondrial	GN=Ech1	ECH1_MOUSE	6	2	8	1.58496
Delta-1-pyrroline-5-carboxylate dehydrogenase	GN=Aldh4a1	AL4A1_MOUSE	4	3	7	0.415037
Delta-1-pyrroline-5-carboxylate synthetase	GN=Aldh18a1	P5CS_MOUSE	17	6	23	1.5025
Delta-aminolevulinic acid dehydratase	GN=Alad	HEM2_MOUSE	5	4	9	0.321928
DENN/MADD domain containing 3 AC=B2RQ75 OS=Mus musculus (Mouse).	GN=Dennd3	B2RQ75_MOUSE	1	3	4	-1.58496
DENN/MADD domain containing 4C AC=A2AJX5 OS=Mus musculus (Mouse).	GN=Dennd4c	A2AJX5_MOUSE	3	0	3	N/A
Dennd4b protein AC=B9EKY0 OS=Mus musculus (Mouse).	GN=Dennd4b	B9EKY0_MOUSE	3	2	5	0.584963
Deoxycytidine kinase AC=P43346 OS=Mus musculus (Mouse).	GN=Dck	DCK_MOUSE	0	3	3	N/A
Developmentally-regulated GTP-binding protein 1	GN=Drg1	DRG1_MOUSE	3	2	5	0.584963
Developmentally-regulated GTP-binding protein 2 AC=Q9QXB9 OS=Mus musculus (Mouse).	GN=Drg2	DRG2_MOUSE	6	1	7	2.58496
Diacylglycerol kinase zeta AC=A2AHJ6 OS=Mus musculus (Mouse).	GN=Dgkz	A2AHJ6_MOUSE	1	5	6	-2.32193
Dicarbonyl L-xylulose reductase	GN=Dcxr	A2AC15_MOUSE	2	1	3	1
Differentially expressed in FDCP 6 AC=B2KF17 OS=Mus musculus (Mouse).	GN=Def6	B2KF17_MOUSE	6	3	9	1
Dihydrofolate reductase AC=P00375 OS=Mus musculus (Mouse).	GN=Dhfr	DYR_MOUSE	3	3	6	0
Dihydrolipoyl dehydrogenase	GN=Dld	DLDH_MOUSE	6	5	11	0.263034
Dihydrolipoyllysine-residue acetyltransferase component of pyruvate dehydrogenase complex	GN=Dlat	ODP2_MOUSE	9	5	14	0.847997
Dihydrolipoyllysine-residue succinyltransferase component of 2-oxoglutarate dehydrogenase complex	GN=Dlst	ODO2_MOUSE	8	6	14	0.415037
Dihydropteridine reductase	GN=Qdpr	DHPR_MOUSE	2	2	4	0
Dihydropyrimidinase-related protein 2	GN=Dpysl2	DPYL2_MOUSE	13	0	13	N/A
Di-N-acetylchitobiase AC=Q8R242 OS=Mus musculus (Mouse).	GN=Ctbs	DIAC_MOUSE	2	1	3	1
Dipeptidyl peptidase 8	GN=Dpp8	DPP8_MOUSE	1	2	3	-1
Dipeptidyl peptidase 9	GN=Dpp9	DPP9_MOUSE	5	6	11	-0.263034
Dipeptidyl-peptidase 1	GN=Ctsc	CATC_MOUSE	15	4	19	1.90689
Disabled homolog 2	GN=Dab2	DAB2_MOUSE	4	0	4	N/A
Disco-interacting protein 2 homolog B AC=Q3UH60 OS=Mus musculus (Mouse).	GN=Dip2b	DIP2B_MOUSE	3	1	4	1.58496
Disintegrin and metalloproteinase domain-containing protein 10	GN=Adam10	ADA10_MOUSE	3	2	5	0.584963
Disintegrin and metalloproteinase domain-containing protein 8	GN=Adam8	ADAM8_MOUSE	5	6	11	-0.263034
DNA ligase 1	GN=Lig1	DNLI1_MOUSE	8	9	17	-0.169925
DNA mismatch repair protein Msh2	GN=Msh2	MSH2_MOUSE	2	1	3	1
DNA mismatch repair protein Msh6	GN=Msh6	MSH6_MOUSE	3	4	7	-0.415037
DNA polymerase AC=A2A4H0 OS=Mus musculus (Mouse).	GN=Pola1	A2A4H0_MOUSE	5	1	6	2.32193
DNA polymerase AC=Q3TFX6 OS=Mus musculus (Mouse).	GN=Pold1	Q3TFX6_MOUSE	6	2	8	1.58496
DNA primase large subunit	GN=Prim2	PRI2_MOUSE	3	1	4	1.58496
DNA replication licensing factor MCM4	GN=Mcm4	MCM4_MOUSE	15	7	22	1.09954
DNA segment	GN=D17Wsu104e	A2RSI7_MOUSE	2	2	4	0
DNA topoisomerase 1	GN=Top1	TOP1_MOUSE	9	8	17	0.169925
DNA-(apurinic or apyrimidinic site) lyase	GN=Apex1	APEX1_MOUSE	5	7	12	-0.485427
DNA2-like helicase	GN=Dna2	DNA2L_MOUSE	3	0	3	N/A
DNA-binding protein Ikaros	GN=Ikzf1	IKZF1_MOUSE	5	5	10	0
DNA-directed RNA polymerase II subunit RPB2	GN=Polr2b	RPB2_MOUSE	9	6	15	0.584963
DNA-directed RNA polymerase II subunit RPB4	GN=Polr2d	RPB4_MOUSE	3	2	5	0.584963
DnaJ (Hsp40) homolog	GN=Dnajc5	A2AUE2_MOUSE	1	6	7	-2.58496
DnaJ (Hsp40) homolog	GN=Dnajc10	A2ASA2_MOUSE	4	2	6	1
DnaJ (Hsp40) homolog	GN=Dnajc7	A2A5E2_MOUSE	4	1	5	2
DnaJ (Hsp40) homolog	GN=Dnajc8	A2ALF1_MOUSE	4	0	4	N/A
DnaJ homolog subfamily A member 1	GN=Dnaja1	DNJA1_MOUSE	5	5	10	0
DnaJ homolog subfamily B member 11	GN=Dnajb11	DJB11_MOUSE	9	7	16	0.36257
DnaJ homolog subfamily B member 6	GN=Dnajb6	DNJB6_MOUSE	3	1	4	1.58496
DnaJ homolog subfamily C member 3	GN=Dnajc3	DNJC3_MOUSE	5	3	8	0.736966
DnaJ homolog subfamily C member 9 AC=Q91WN1 OS=Mus musculus (Mouse).	GN=Dnajc9	DNJC9_MOUSE	4	5	9	-0.321928
Docking protein 2	GN=Dok2	DOK2_MOUSE	1	5	6	-2.32193
Docking protein 3	GN=Dok3	DOK3_MOUSE	11	7	18	0.652077
Dolichol-phosphate (Beta-D) mannosyltransferase 1	GN=Dpm1	A2BDX1_MOUSE	5	2	7	1.32193
Dolichyl-diphosphooligosaccharide--protein glycosyltransferase 48 kDa subunit AC=O54734 OS=Mus musculus (Mouse).	GN=Ddost	OST48_MOUSE	15	15	30	0
Dolichyl-phosphate beta-glucosyltransferase	GN=Alg5	ALG5_MOUSE	3	1	4	1.58496
Double-stranded RNA-specific adenosine deaminase	GN=Adar	DSRAD_MOUSE	3	3	6	0
Down syndrome critical region gene 3	GN=Dscr3	A6X962_MOUSE	3	2	5	0.584963
Drebrin-like protein	GN=Dbnl	DBNL_MOUSE	18	19	37	-0.0780025
Dual specificity mitogen-activated protein kinase kinase 2	GN=Map2k2	MP2K2_MOUSE	6	5	11	0.263034
Dual specificity mitogen-activated protein kinase kinase 4	GN=Map2k4	MP2K4_MOUSE	7	11	18	-0.652077
Dynactin subunit 1	GN=Dctn1	DCTN1_MOUSE	14	11	25	0.347923
Dynactin subunit 2	GN=Dctn2	DCTN2_MOUSE	5	8	13	-0.678072
Dynactin subunit 4	GN=Dctn4	DCTN4_MOUSE	3	2	5	0.584963
Dynein	GN=Dnahc9	B1AR51_MOUSE	2	3	5	-0.584963
Dynein cytoplasmic 1 intermediate chain 2 AC=A2BFF5 OS=Mus musculus (Mouse).	GN=Dync1i2	A2BFF5_MOUSE	2	3	5	-0.584963
Dynein cytoplasmic 2 heavy chain 1 AC=B8JJF9 OS=Mus musculus (Mouse).	GN=Dync2h1	B8JJF9_MOUSE	2	2	4	0
Dynein light chain 1	GN=Dynll1	DYL1_MOUSE	2	3	5	-0.584963
Dynein light chain 2	GN=Dynll2	B2KGQ2_MOUSE	3	2	5	0.584963
E1A-binding protein p400	GN=Ep400	EP400_MOUSE	2	2	4	0
E3 ubiquitin-protein ligase BRE1B	GN=Rnf40	BRE1B_MOUSE	2	2	4	0
E3 ubiquitin-protein ligase CBL	GN=Cbl	CBL_MOUSE	10	8	18	0.321928
E3 ubiquitin-protein ligase NEDD4-like	GN=Nedd4l	NED4L_MOUSE	2	3	5	-0.584963
E3 ubiquitin-protein ligase RNF25	GN=Rnf25	RNF25_MOUSE	5	2	7	1.32193
E3 ubiquitin-protein ligase TRIM33	GN=Trim33	TRI33_MOUSE	1	5	6	-2.32193
E3 ubiquitin-protein ligase UBR5	GN=Ubr5	UBR5_MOUSE	1	4	5	-2
E3 ubiquitin-protein ligase UHRF2	GN=Uhrf2	UHRF2_MOUSE	2	1	3	1
E8 variable heavy chain AC=A2NW55 OS=Mus musculus (Mouse).	GN=Igl-V1	A2NW55_MOUSE	4	1	5	2
Early endosome antigen 1 AC=Q8BL66 OS=Mus musculus (Mouse).	GN=Eea1	EEA1_MOUSE	4	7	11	-0.807355
Echinoderm microtubule-associated protein-like 2 AC=Q7TNG5 OS=Mus musculus (Mouse).	GN=Eml2	EMAL2_MOUSE	4	12	16	-1.58496
Echinoderm microtubule-associated protein-like 3 AC=Q8VC03 OS=Mus musculus (Mouse).	GN=Eml3	EMAL3_MOUSE	2	3	5	-0.584963
Ectonucleoside triphosphate diphosphohydrolase 1	GN=Entpd1	ENTP1_MOUSE	5	1	6	2.32193
Ectonucleoside triphosphate diphosphohydrolase 5	GN=Entpd5	ENTP5_MOUSE	1	2	3	-1
EF-hand domain-containing family member A1 AC=Q8CD10 OS=Mus musculus (Mouse).	GN=Efha1	EFHA1_MOUSE	0	3	3	N/A
EG620155 protein AC=B2RY53 OS=Mus musculus (Mouse).	GN=EG620155	B2RY53_MOUSE	2	1	3	1
EH domain-binding protein 1-like protein 1	GN=Ehbp1l1	EH1L1_MOUSE	7	6	13	0.222392
Eif2b3 protein AC=A0AUM9 OS=Mus musculus (Mouse).	GN=Eif2b3	A0AUM9_MOUSE	3	2	5	0.584963
Elastase 2	GN=Ela2	A6H698_MOUSE	31	66	97	-1.0902
Electron transfer flavoprotein subunit beta AC=Q9DCW4 OS=Mus musculus (Mouse).	GN=Etfb	ETFB_MOUSE	9	7	16	0.36257
Electron transfer flavoprotein-ubiquinone oxidoreductase	GN=Etfdh	ETFD_MOUSE	7	3	10	1.22239
Electron transferring flavoprotein	GN=Etfa	B1B1B4_MOUSE	20	11	31	0.862496
Elongation factor 1-gamma	GN=Eef1g	EF1G_MOUSE	13	15	28	-0.206451
Elongation factor G 1	GN=Gfm1	EFG1_MOUSE	4	0	4	N/A
Elongation factor Ts	GN=Tsfm	EFTS_MOUSE	2	1	3	1
Elongation factor Tu	GN=Tufm	EFTU_MOUSE	13	6	19	1.11548
Elongation factor Tu GTP-binding domain-containing protein 1 AC=Q8C0D5 OS=Mus musculus (Mouse).	GN=Eftud1	ETUD1_MOUSE	1	2	3	-1
Elongation of very long chain fatty acids protein 1 AC=Q9JLJ5 OS=Mus musculus (Mouse).	GN=Elovl1	ELOV1_MOUSE	3	3	6	0
Elongator complex protein 1	GN=Ikbkap	ELP1_MOUSE	4	3	7	0.415037
Embigin	GN=Emb	EMB_MOUSE	5	5	10	0
Emerin AC=O08579 OS=Mus musculus (Mouse).	GN=Emd	EMD_MOUSE	3	2	5	0.584963
EMILIN-2	GN=Emilin2	EMIL2_MOUSE	10	11	21	-0.137504
Endophilin-B1	GN=Sh3glb1	SHLB1_MOUSE	2	2	4	0
Endoplasmic reticulum aminopeptidase 1	GN=Erap1	ERAP1_MOUSE	6	4	10	0.584963
Endoplasmic reticulum metallopeptidase 1 AC=B2RXD6 OS=Mus musculus (Mouse).	GN=Ermp1	B2RXD6_MOUSE	7	6	13	0.222392
Endoplasmic reticulum protein ERp29 AC=P57759 OS=Mus musculus (Mouse).	GN=Erp29	ERP29_MOUSE	11	4	15	1.45943
Enhancer of filamentation 1	GN=Nedd9	CASL_MOUSE	1	3	4	-1.58496
Enhancer of mRNA-decapping protein 4 AC=Q3UJB9 OS=Mus musculus (Mouse).	GN=Edc4	EDC4_MOUSE	5	4	9	0.321928
Enoyl-CoA hydratase	GN=Echs1	ECHM_MOUSE	6	2	8	1.58496
ENSMUSG00000076577 protein AC=Q52L64 OS=Mus musculus (Mouse).	GN=ENSMUSG00000076577	Q52L64_MOUSE	10	2	12	2.32193
Eosinophil cationic protein 1	GN=Ear1	ECP1_MOUSE	10	2	12	2.32193
Eosinophil cationic protein 2	GN=Ear2	ECP2_MOUSE	10	2	12	2.32193
Eosinophil-associated ribonuclease 7	GN=Ear7	Q9R126_MOUSE	11	1	12	3.45943
Ep300 protein AC=B2RWS6 OS=Mus musculus (Mouse).	GN=Ep300	B2RWS6_MOUSE	3	3	6	0
Epidermal growth factor receptor substrate 15	GN=Eps15	EPS15_MOUSE	9	8	17	0.169925
Epidermal growth factor receptor substrate 15-like 1	GN=Eps15l1	EP15R_MOUSE	6	7	13	-0.222392
Epididymal secretory protein E1	GN=Npc2	NPC2_MOUSE	10	3	13	1.73697
Epididymis-specific alpha-mannosidase	GN=Man2b2	MA2B2_MOUSE	2	1	3	1
Erlin-1	GN=Erlin1	ERLN1_MOUSE	6	1	7	2.58496
Erlin-2	GN=Erlin2	ERLN2_MOUSE	7	2	9	1.80735
Erythrocyte protein band 4.1-like 2 AC=B6ZHC5 OS=Mus musculus (Mouse).	GN=Epb4.1l2	B6ZHC5_MOUSE	3	3	6	0
Ester hydrolase C11orf54 homolog AC=Q91V76 OS=Mus musculus (Mouse).	GN=D7h11orf16	CK054_MOUSE	3	2	5	0.584963
Estradiol 17-beta-dehydrogenase 12	GN=Hsd17b12	DHB12_MOUSE	3	3	6	0
Eukaryotic translation initiation factor 2 subunit 1	GN=Eif2s1	IF2A_MOUSE	4	6	10	-0.584963
Eukaryotic translation initiation factor 2 subunit 2	GN=Eif2s2	IF2B_MOUSE	7	10	17	-0.514573
Eukaryotic translation initiation factor 2 subunit 3	GN=Eif2s3x	IF2G_MOUSE	6	9	15	-0.584963
Eukaryotic translation initiation factor 2A AC=Q8BJW6 OS=Mus musculus (Mouse).	GN=Eif2a	EIF2A_MOUSE	4	7	11	-0.807355
Eukaryotic translation initiation factor 2C	GN=Eif2c2	A1A563_MOUSE	10	16	26	-0.678072
Eukaryotic translation initiation factor 3	GN=Eif3i	A2AE04_MOUSE	8	9	17	-0.169925
Eukaryotic translation initiation factor 3 subunit B	GN=Eif3b	EIF3B_MOUSE	17	11	28	0.628031
Eukaryotic translation initiation factor 3 subunit D	GN=Eif3d	EIF3D_MOUSE	12	9	21	0.415037
Eukaryotic translation initiation factor 3 subunit E	GN=Eif3e	EIF3E_MOUSE	8	8	16	0
Eukaryotic translation initiation factor 3 subunit F	GN=Eif3f	EIF3F_MOUSE	8	4	12	1
Eukaryotic translation initiation factor 3 subunit G	GN=Eif3g	EIF3G_MOUSE	6	2	8	1.58496
Eukaryotic translation initiation factor 3 subunit H	GN=Eif3h	EIF3H_MOUSE	9	8	17	0.169925
Eukaryotic translation initiation factor 3 subunit J	GN=Eif3j	EIF3J_MOUSE	4	0	4	N/A
Eukaryotic translation initiation factor 3 subunit K	GN=Eif3k	EIF3K_MOUSE	2	3	5	-0.584963
Eukaryotic translation initiation factor 3 subunit L	GN=Eif3l	EIF3L_MOUSE	6	4	10	0.584963
Eukaryotic translation initiation factor 3 subunit M	GN=Eif3m	EIF3M_MOUSE	11	8	19	0.459432
Eukaryotic translation initiation factor 4	GN=Eif4g2	A0JNY7_MOUSE	8	7	15	0.192645
Eukaryotic translation initiation factor 4E	GN=Eif4e	IF4E_MOUSE	3	3	6	0
Eukaryotic translation initiation factor 4H	GN=Eif4h	IF4H_MOUSE	9	5	14	0.847997
Eukaryotic translation initiation factor 5 AC=P59325 OS=Mus musculus (Mouse).	GN=Eif5	IF5_MOUSE	14	12	26	0.222392
Eukaryotic translation initiation factor 5A-1	GN=Eif5a	IF5A1_MOUSE	42	42	84	0
Eukaryotic translation initiation factor 5B	GN=Eif5b	IF2P_MOUSE	10	7	17	0.514573
Eukaryotic translation initiation factor 6	GN=Eif6	IF6_MOUSE	7	4	11	0.807355
Exocyst complex component 1	GN=Exoc1	EXOC1_MOUSE	1	4	5	-2
Exocyst complex component 2	GN=Exoc2	EXOC2_MOUSE	4	2	6	1
Exocyst complex component 4	GN=Exoc4	EXOC4_MOUSE	7	5	12	0.485427
Exocyst complex component 6	GN=Exoc6	EXOC6_MOUSE	1	3	4	-1.58496
Exocyst complex component 7 AC=A2AAN0 OS=Mus musculus (Mouse).	GN=Exoc7	A2AAN0_MOUSE	2	3	5	-0.584963
Exosome complex exonuclease RRP41	GN=Exosc4	EXOS4_MOUSE	2	2	4	0
Exosome complex exonuclease RRP44	GN=Dis3	RRP44_MOUSE	3	2	5	0.584963
Exosome component 10 AC=B1ARY9 OS=Mus musculus (Mouse).	GN=Exosc10	B1ARY9_MOUSE	4	2	6	1
Exosome component 2 AC=A2AV19 OS=Mus musculus (Mouse).	GN=Exosc2	A2AV19_MOUSE	3	1	4	1.58496
Exosome component 3	GN=Exosc3	A2AKB8_MOUSE	4	0	4	N/A
Exportin 5 AC=A2RRJ4 OS=Mus musculus (Mouse).	GN=Xpo5	A2RRJ4_MOUSE	7	0	7	N/A
Exportin-7	GN=Xpo7	XPO7_MOUSE	6	8	14	-0.415037
Exportin-T	GN=Xpot	XPOT_MOUSE	1	2	3	-1
FACT complex subunit SPT16	GN=Supt16h	SP16H_MOUSE	8	12	20	-0.584963
Fam63a protein	GN=Fam63a	B7ZMR0_MOUSE	1	3	4	-1.58496
Family with sequence similarity 62	GN=D12Ertd551e	B2RSN5_MOUSE	8	12	20	-0.584963
Farnesyl pyrophosphate synthetase	GN=Fdps	FPPS_MOUSE	18	14	32	0.36257
Farsla protein AC=Q4FJQ2 OS=Mus musculus (Mouse).	GN=Farsa	Q4FJQ2_MOUSE	3	3	6	0
FAS-associated factor 1 AC=P54731 OS=Mus musculus (Mouse).	GN=Faf1	FAF1_MOUSE	3	3	6	0
FAS-associated factor 2	GN=Faf2	FAF2_MOUSE	4	0	4	N/A
Fatty acid-binding protein	GN=Fabp5	FABP5_MOUSE	9	0	9	N/A
Fatty acyl-CoA reductase 1	GN=Far1	FACR1_MOUSE	3	6	9	-1
Fatty aldehyde dehydrogenase	GN=Aldh3a2	AL3A2_MOUSE	4	6	10	-0.584963
F-box-like/WD repeat-containing protein TBL1XR1	GN=Tbl1xr1	TBL1R_MOUSE	6	5	11	0.263034
FCH domain only protein 2 AC=Q3UQN2 OS=Mus musculus (Mouse).	GN=Fcho2	FCHO2_MOUSE	4	3	7	0.415037
FERM domain-containing protein 8 AC=Q3UFK8 OS=Mus musculus (Mouse).	GN=Frmd8	FRMD8_MOUSE	2	2	4	0
Ferritin heavy chain AC=P09528 OS=Mus musculus (Mouse).	GN=Fth1	FRIH_MOUSE	5	2	7	1.32193
Ferritin light chain 1	GN=Ftl1	FRIL1_MOUSE	18	6	24	1.58496
Fgd4 protein AC=A1L355 OS=Mus musculus (Mouse).	GN=Fgd4	A1L355_MOUSE	2	1	3	1
FH1/FH2 domain-containing protein 1	GN=Fhod1	FHOD1_MOUSE	4	2	6	1
Fibrinogen	GN=Fga	Q99K47_MOUSE	8	3	11	1.41504
Fibrinogen beta chain	GN=Fgb	FIBB_MOUSE	14	1	15	3.80735
Fibrinogen gamma chain AC=Q8VCM7 OS=Mus musculus (Mouse).	GN=Fgg	FIBG_MOUSE	8	1	9	3
Ficolin B AC=A3KGE2 OS=Mus musculus (Mouse).	GN=Fcnb	A3KGE2_MOUSE	2	5	7	-1.32193
FK506-binding protein 2	GN=Fkbp2	FKBP2_MOUSE	5	8	13	-0.678072
FK506-binding protein 3	GN=Fkbp3	FKBP3_MOUSE	2	2	4	0
FK506-binding protein 4	GN=Fkbp4	FKBP4_MOUSE	4	9	13	-1.16993
FK506-binding protein 5	GN=Fkbp5	FKBP5_MOUSE	7	5	12	0.485427
FK506-binding protein 8	GN=Fkbp8	FKBP8_MOUSE	4	3	7	0.415037
Fkbp15 protein AC=B2RQ18 OS=Mus musculus (Mouse).	GN=Fkbp15	B2RQ18_MOUSE	5	9	14	-0.847997
Flavin containing monooxygenase 5	GN=Fmo5	Q8R1W6_MOUSE	5	8	13	-0.678072
Flavin reductase	GN=Blvrb	BLVRB_MOUSE	3	1	4	1.58496
Formin binding protein 1 AC=A2AQ40 OS=Mus musculus (Mouse).	GN=Fnbp1	A2AQ40_MOUSE	5	7	12	-0.485427
Formyl peptide receptor 2	GN=Fpr2	O88536_MOUSE	1	5	6	-2.32193
Fragile X mental retardation syndrome-related protein 1 AC=Q9WUA9 OS=Mus musculus (Mouse).	GN=Fxr1	FXR1_MOUSE	5	4	9	0.321928
Fragilis	GN=Ifitm3	Q9CQW9_MOUSE	7	8	15	-0.192645
Fragilis R	GN=Ifitm2	Q99J93_MOUSE	3	2	5	0.584963
Friend leukemia integration 1 transcription factor	GN=Fli1	FLI1_MOUSE	3	4	7	-0.415037
Fructose-1	GN=Fbp1	F16P1_MOUSE	4	6	10	-0.584963
Fryl protein AC=Q80XD5 OS=Mus musculus (Mouse).	GN=Fryl	Q80XD5_MOUSE	4	5	9	-0.321928
FtsJ homolog 3 (E. coli) AC=B1ARK1 OS=Mus musculus (Mouse).	GN=Ftsj3	B1ARK1_MOUSE	2	3	5	-0.584963
FtsJ methyltransferase domain-containing protein 2 AC=Q9DBC3 OS=Mus musculus (Mouse).	GN=Ftsjd2	FTSJ2_MOUSE	6	8	14	-0.415037
Fumarate hydratase	GN=Fh	FUMH_MOUSE	16	9	25	0.830075
Fumarylacetoacetase	GN=Fah	FAAA_MOUSE	3	6	9	-1
FUS interacting protein (Serine-arginine rich) 1 AC=B1AV44 OS=Mus musculus (Mouse).	GN=Fusip1	B1AV44_MOUSE	4	3	7	0.415037
FXYD domain-containing ion transport regulator 5	GN=Fxyd5	FXYD5_MOUSE	3	4	7	-0.415037
FYN binding protein	GN=Fyb	B2RUR0_MOUSE	4	5	9	-0.321928
FYVE	GN=Fgd3	A2RT26_MOUSE	5	12	17	-1.26303
G protein pathway suppressor 1 AC=B0QZT1 OS=Mus musculus (Mouse).	GN=Gps1	B0QZT1_MOUSE	2	4	6	-1
G protein-coupled receptor kinase 6 AC=O70296 OS=Mus musculus (Mouse).	GN=Grk6	O70296_MOUSE	4	3	7	0.415037
G1p2 protein	GN=Isg15	Q4FJR9_MOUSE	1	4	5	-2
GA-binding protein alpha chain AC=Q00422 OS=Mus musculus (Mouse).	GN=Gabpa	GABPA_MOUSE	3	2	5	0.584963
Gag protein AC=Q7TQ39 OS=Mus musculus (Mouse).	GN=ENSMUSG00000074697	Q7TQ39_MOUSE	1	1	2	0
Galactokinase 1 AC=Q80UL3 OS=Mus musculus (Mouse).	GN=Galk1	Q80UL3_MOUSE	7	2	9	1.80735
Galactose-4-epimerase	GN=Gale	B1AV55_MOUSE	2	3	5	-0.584963
Galectin-1	GN=Lgals1	LEG1_MOUSE	7	5	12	0.485427
Galectin-3	GN=Lgals3	LEG3_MOUSE	20	33	53	-0.722466
Galectin-3-binding protein	GN=Lgals3bp	LG3BP_MOUSE	7	0	7	N/A
Gamma-aminobutyraldehyde dehydrogenase AC=A7VL18 OS=Mus musculus (Mouse).	GN=Aldh9a1	A7VL18_MOUSE	11	9	20	0.289507
Gamma-glutamyltransferase 5	GN=Ggt5	GGT5_MOUSE	4	0	4	N/A
Gamma-glutamyltranspeptidase 1	GN=Ggt1	GGT1_MOUSE	3	0	3	N/A
Gamma-parvin AC=Q9ERD8 OS=Mus musculus (Mouse).	GN=Parvg	PARVG_MOUSE	5	9	14	-0.847997
Gamma-tubulin complex component 2 AC=Q921G8 OS=Mus musculus (Mouse).	GN=Tubgcp2	GCP2_MOUSE	0	3	3	N/A
Gamma-tubulin1	GN=Tubg1	Q6F4J1_MOUSE	0	3	3	N/A
Ganglioside-induced differentiation-associated protein 2 AC=Q9DBL2 OS=Mus musculus (Mouse).	GN=Gdap2	GDAP2_MOUSE	2	1	3	1
Garnl1 protein AC=B7ZNA3 OS=Mus musculus (Mouse).	GN=Garnl1	B7ZNA3_MOUSE	2	4	6	-1
Gasdermin-D	GN=Gsdmdc1	GSDMD_MOUSE	7	10	17	-0.514573
GC-rich sequence DNA-binding factor homolog AC=P58501 OS=Mus musculus (Mouse).	GN=Gcfc	GCFC_MOUSE	3	1	4	1.58496
GDP-L-fucose synthetase	GN=Tsta3	FCL_MOUSE	3	4	7	-0.415037
GEM-interacting protein AC=Q6PGG2 OS=Mus musculus (Mouse).	GN=Gmip	GMIP_MOUSE	5	14	19	-1.48543
General vesicular transport factor p115	GN=Uso1	USO1_MOUSE	8	7	15	0.192645
GLI pathogenesis-related 2 AC=B1AWD5 OS=Mus musculus (Mouse).	GN=Glipr2	B1AWD5_MOUSE	2	4	6	-1
Glia maturation factor beta AC=A7VJ98 OS=Mus musculus (Mouse).	GN=Gmfb	A7VJ98_MOUSE	2	3	5	-0.584963
Glia maturation factor gamma AC=A7VJA4 OS=Mus musculus (Mouse).	GN=Gmfg	A7VJA4_MOUSE	7	8	15	-0.192645
Glia-derived nexin	GN=Serpine2	GDN_MOUSE	3	1	4	1.58496
Glucocorticoid modulatory element binding protein 2 AC=A2AS06 OS=Mus musculus (Mouse).	GN=Gmeb2	A2AS06_MOUSE	2	4	6	-1
Glucosamine-6-phosphate isomerase 1	GN=Gnpda1	GNPI1_MOUSE	3	0	3	N/A
Glucosamine--fructose-6-phosphate aminotransferase [isomerizing] 1	GN=Gfpt1	GFPT1_MOUSE	2	2	4	0
Glucosidase	GN=Gaa	A2AFL4_MOUSE	5	0	5	N/A
Glucosidase 2 subunit beta	GN=Prkcsh	GLU2B_MOUSE	9	8	17	0.169925
Glutamate--cysteine ligase regulatory subunit	GN=Gclm	GSH0_MOUSE	8	2	10	2
Glutaredoxin-1	GN=Glrx	GLRX1_MOUSE	16	25	41	-0.643856
Glutaredoxin-3	GN=Glrx3	GLRX3_MOUSE	6	4	10	0.584963
Glutathione peroxidase 1	GN=Gpx1	GPX1_MOUSE	19	19	38	0
Glutathione reductase	GN=Gsr	GSHR_MOUSE	13	20	33	-0.621488
Glutathione S-transferase omega-1	GN=Gsto1	GSTO1_MOUSE	9	10	19	-0.152003
Glutathione S-transferase P 1	GN=Gstp1	GSTP1_MOUSE	1	6	7	-2.58496
Glutathione synthetase	GN=Gss	GSHB_MOUSE	5	0	5	N/A
Glycerol kinase	GN=Gyk	B1ASZ0_MOUSE	1	2	3	-1
Glycerol-3-phosphate dehydrogenase [NAD+]	GN=Gpd1	GPDA_MOUSE	3	2	5	0.584963
Glycerol-3-phosphate dehydrogenase 1-like	GN=Gpd1l	B2RSR7_MOUSE	6	7	13	-0.222392
Glycogen [starch] synthase	GN=Gys1	GYS1_MOUSE	7	13	20	-0.893085
Glycogen synthase kinase-3 alpha AC=Q2NL51 OS=Mus musculus (Mouse).	GN=Gsk3a	GSK3A_MOUSE	1	1	2	0
Glycogen synthase kinase-3 beta AC=Q9WV60 OS=Mus musculus (Mouse).	GN=Gsk3b	GSK3B_MOUSE	1	2	3	-1
Glycogenin-1 AC=Q9R062 OS=Mus musculus (Mouse).	GN=Gyg1	GLYG_MOUSE	16	23	39	-0.523562
Glycolipid transfer protein AC=Q9JL62 OS=Mus musculus (Mouse).	GN=Gltp	GLTP_MOUSE	3	4	7	-0.415037
Glycoprotein 1b	GN=Gp1ba	A2CFB8_MOUSE	5	0	5	N/A
Glycylpeptide N-tetradecanoyltransferase 1	GN=Nmt1	NMT1_MOUSE	12	5	17	1.26303
Glycylpeptide N-tetradecanoyltransferase AC=A2AJH3 OS=Mus musculus (Mouse).	GN=Nmt2	A2AJH3_MOUSE	3	2	5	0.584963
Glycyl-tRNA synthetase	GN=Gars	SYG_MOUSE	14	13	27	0.106915
Glyoxalase domain-containing protein 4 AC=Q9CPV4 OS=Mus musculus (Mouse).	GN=Glod4	GLOD4_MOUSE	6	5	11	0.263034
Glyoxalase I AC=A5GZX3 OS=Mus musculus (Mouse).	GN=Glo1	A5GZX3_MOUSE	7	5	12	0.485427
Glyoxylate reductase/hydroxypyruvate reductase AC=Q91Z53 OS=Mus musculus (Mouse).	GN=Grhpr	GRHPR_MOUSE	3	0	3	N/A
Glypican-1	GN=Gpc1	GPC1_MOUSE	2	9	11	-2.16993
GMP reductase 1	GN=Gmpr	GMPR1_MOUSE	2	3	5	-0.584963
GMP reductase 2	GN=Gmpr2	GMPR2_MOUSE	2	5	7	-1.32193
Golgb1 protein AC=B2RWW2 OS=Mus musculus (Mouse).	GN=Golgb1	B2RWW2_MOUSE	2	1	3	1
Golgi autoantigen	GN=Golga2	A2AN43_MOUSE	4	2	6	1
Golgi integral membrane protein 4	GN=Golim4	GOLI4_MOUSE	5	6	11	-0.263034
Golgi phosphoprotein 3	GN=Golph3	GOLP3_MOUSE	5	5	10	0
Golgi phosphoprotein 3-like AC=Q8R088 OS=Mus musculus (Mouse).	GN=Golph3l	GLP3L_MOUSE	1	2	3	-1
Golgi reassembly stacking protein 2	GN=Gorasp2	A2ATI7_MOUSE	7	10	17	-0.514573
Golgi resident protein GCP60	GN=Acbd3	GCP60_MOUSE	4	4	8	0
Golgi SNAP receptor complex member 2	GN=Gosr2	A2A9H9_MOUSE	2	1	3	1
Golgin subfamily A member 3	GN=Golga3	GOGA3_MOUSE	2	1	3	1
Golgin subfamily A member 5	GN=Golga5	GOGA5_MOUSE	4	3	7	0.415037
Golgi-specific brefeldin A-resistance factor 1 AC=Q6DFZ1 OS=Mus musculus (Mouse).	GN=Gbf1	Q6DFZ1_MOUSE	2	3	5	-0.584963
Gphn protein AC=A0JNY3 OS=Mus musculus (Mouse).	GN=Gphn	A0JNY3_MOUSE	1	4	5	-2
GPI transamidase component PIG-S	GN=Pigs	PIGS_MOUSE	5	5	10	0
GPI-anchor transamidase	GN=Pigk	GPI8_MOUSE	3	0	3	N/A
G-protein-signaling modulator 3 AC=Q3U1Z5 OS=Mus musculus (Mouse).	GN=Gpsm3	GPSM3_MOUSE	1	6	7	-2.58496
Grancalcin AC=A2AUY9 OS=Mus musculus (Mouse).	GN=Gca	A2AUY9_MOUSE	10	9	19	0.152003
Granulins	GN=Grn	GRN_MOUSE	1	3	4	-1.58496
GRIP and coiled-coil domain-containing protein 1	GN=Gcc1	GCC1_MOUSE	1	3	4	-1.58496
GRIP1 associated protein 1 AC=A2AEW7 OS=Mus musculus (Mouse).	GN=Gripap1	A2AEW7_MOUSE	5	8	13	-0.678072
Growth arrest specific 7 AC=B1ATI9 OS=Mus musculus (Mouse).	GN=Gas7	B1ATI9_MOUSE	1	2	3	-1
Growth factor receptor bound protein 2 AC=B1AT92 OS=Mus musculus (Mouse).	GN=Grb2	B1AT92_MOUSE	8	8	16	0
GrpE protein homolog 1	GN=Grpel1	GRPE1_MOUSE	4	0	4	N/A
GTPase-activating protein and VPS9 domain-containing protein 1	GN=Gapvd1	GAPD1_MOUSE	8	7	15	0.192645
GTP-binding protein 1 AC=O08582 OS=Mus musculus (Mouse).	GN=Gtpbp1	GTPB1_MOUSE	8	6	14	0.415037
Guanine monphosphate synthetase	GN=Gmps	B2RRH9_MOUSE	13	8	21	0.70044
Guanine nucleotide exchange factor for Rab3A	GN=Rab3il1	R3GEF_MOUSE	5	0	5	N/A
Guanine nucleotide-binding protein G(I)/G(S)/G(O) subunit gamma-12 AC=Q9DAS9 OS=Mus musculus (Mouse).	GN=Gng12	GBG12_MOUSE	1	3	4	-1.58496
Guanine nucleotide-binding protein G(q) subunit alpha	GN=Gnaq	GNAQ_MOUSE	2	2	4	0
Guanine nucleotide-binding protein subunit alpha-11 AC=P21278 OS=Mus musculus (Mouse).	GN=Gna11	GNA11_MOUSE	2	3	5	-0.584963
Guanine nucleotide-binding protein subunit beta-2-like 1	GN=Gnb2l1	GBLP_MOUSE	20	16	36	0.321928
H/ACA ribonucleoprotein complex subunit 1	GN=Gar1	GAR1_MOUSE	3	1	4	1.58496
H/ACA ribonucleoprotein complex subunit 4	GN=Dkc1	DKC1_MOUSE	6	1	7	2.58496
H-2 class II histocompatibility antigen	GN=H2-Ab1	HB2D_MOUSE	9	2	11	2.16993
H-2 class II histocompatibility antigen	GN=H2-Aa	HA2D_MOUSE	5	2	7	1.32193
HEAT repeat-containing protein 5B AC=Q8C547 OS=Mus musculus (Mouse).	GN=Heatr5b	HTR5B_MOUSE	2	6	8	-1.58496
Heat shock 70 kDa protein 14	GN=Hspa14	HSP7E_MOUSE	3	3	6	0
Heat shock factor-binding protein 1 AC=Q9CQZ1 OS=Mus musculus (Mouse).	GN=Hsbp1	HSBP1_MOUSE	5	3	8	0.736966
Heat shock protein 105 kDa	GN=Hsph1	HS105_MOUSE	7	4	11	0.807355
HECT	GN=Huwe1	A2AFQ0_MOUSE	6	10	16	-0.736966
HECT domain containing 3 AC=B1AUL1 OS=Mus musculus (Mouse).	GN=Hectd3	B1AUL1_MOUSE	4	6	10	-0.584963
Hectd1 protein AC=Q05BY9 OS=Mus musculus (Mouse).	GN=Hectd1	Q05BY9_MOUSE	2	1	3	1
Hematological and neurological expressed 1-like protein AC=Q6PGH2 OS=Mus musculus (Mouse).	GN=Hn1l	HN1L_MOUSE	2	3	5	-0.584963
Heme oxygenase 1	GN=Hmox1	HMOX1_MOUSE	9	5	14	0.847997
Heme oxygenase 2 AC=O70252 OS=Mus musculus (Mouse).	GN=Hmox2	HMOX2_MOUSE	5	2	7	1.32193
Heme-binding protein 1	GN=Hebp1	HEBP1_MOUSE	3	3	6	0
Hemopexin AC=Q91X72 OS=Mus musculus (Mouse).	GN=Hpx	HEMO_MOUSE	3	5	8	-0.736966
Hepatitis B virus X-interacting protein homolog AC=Q9D1L9 OS=Mus musculus (Mouse).	GN=Hbxip	HBXIP_MOUSE	4	5	9	-0.321928
Hepatoma-derived growth factor AC=P51859 OS=Mus musculus (Mouse).	GN=Hdgf	HDGF_MOUSE	4	6	10	-0.584963
Hepatoma-derived growth factor-related protein 2 AC=Q3UMU9 OS=Mus musculus (Mouse).	GN=Hdgfrp2	HDGR2_MOUSE	0	3	3	N/A
Heterochromatin protein 1-binding protein 3 AC=Q8C911 OS=Mus musculus (Mouse).	GN=Hp1bp3	HP1B3_MOUSE	5	7	12	-0.485427
Heterogeneous nuclear ribonucleoprotein G	GN=Rbmx	HNRPG_MOUSE	5	8	13	-0.678072
Heterogeneous nuclear ribonucleoprotein L-like AC=Q921F4 OS=Mus musculus (Mouse).	GN=Hnrpll	HNRLL_MOUSE	14	16	30	-0.192645
Heterogeneous nuclear ribonucleoprotein U-like protein 1 AC=Q8VDM6 OS=Mus musculus (Mouse).	GN=Hnrnpul1	HNRL1_MOUSE	14	10	24	0.485427
Heterogeneous nuclear ribonucleoproteins C1/C2	GN=Hnrnpc	HNRPC_MOUSE	11	14	25	-0.347923
Hexose-6-phosphate dehydrogenase (Glucose 1-dehydrogenase) AC=A2A7A7 OS=Mus musculus (Mouse).	GN=H6pd	A2A7A7_MOUSE	4	4	8	0
HGF-regulated tyrosine kinase substrate AC=B1ATZ0 OS=Mus musculus (Mouse).	GN=Hgs	B1ATZ0_MOUSE	3	3	6	0
High affinity immunoglobulin epsilon receptor subunit gamma	GN=Fcer1g	FCERG_MOUSE	5	1	6	2.32193
High affinity interleukin-8 receptor B	GN=Il8rb	CXCR2_MOUSE	4	3	7	0.415037
High mobility group box 3 AC=A2AP78 OS=Mus musculus (Mouse).	GN=Hmgb3	A2AP78_MOUSE	3	1	4	1.58496
Hippocalcin-like protein 1	GN=Hpcal1	HPCL1_MOUSE	6	5	11	0.263034
Histamine N-methyltransferase	GN=Hnmt	A2AQK4_MOUSE	2	2	4	0
Histidine triad nucleotide binding protein	GN=Hint1	B1AZK3_MOUSE	3	1	4	1.58496
Histocompatibility 13	GN=H13	A3KGS1_MOUSE	1	2	3	-1
Histone deacetylase 1 AC=O09106 OS=Mus musculus (Mouse).	GN=Hdac1	HDAC1_MOUSE	6	8	14	-0.415037
Histone deacetylase 2	GN=Hdac2	HDAC2_MOUSE	2	7	9	-1.80735
Histone H2A AC=A0AUV1 OS=Mus musculus (Mouse).	GN=Hist1h2ah	A0AUV1_MOUSE	18	65	83	-1.85244
Histone H2A AC=B2RVP5 OS=Mus musculus (Mouse).	GN=H2afv	B2RVP5_MOUSE	13	20	33	-0.621488
Histone H2A AC=B2RWH3 OS=Mus musculus (Mouse).	GN=Hist2h2aa1	B2RWH3_MOUSE	18	63	81	-1.80735
Histone H2A type 2-B	GN=Hist2h2ab	H2A2B_MOUSE	8	12	20	-0.584963
Histone H2A.x AC=P27661 OS=Mus musculus (Mouse).	GN=H2afx	H2AX_MOUSE	17	27	44	-0.667425
Histone-lysine N-methyltransferase NSD3	GN=Whsc1l1	NSD3_MOUSE	3	0	3	N/A
HnRNP-associated with lethal yellow AC=A2AU62 OS=Mus musculus (Mouse).	GN=C130057N11Rik	A2AU62_MOUSE	5	4	9	0.321928
Homeobox protein cut-like 1	GN=Cux1	CUX1_MOUSE	4	1	5	2
Hormone-sensitive lipase AC=P54310 OS=Mus musculus (Mouse).	GN=Lipe	LIPS_MOUSE	3	9	12	-1.58496
Host cell factor C1 AC=B1AUX1 OS=Mus musculus (Mouse).	GN=Hcfc1	B1AUX1_MOUSE	17	9	26	0.917538
Hsc70-interacting protein	GN=St13	F10A1_MOUSE	3	2	5	0.584963
Hsp70-binding protein 1	GN=Hspbp1	HPBP1_MOUSE	3	1	4	1.58496
Hsp90 co-chaperone Cdc37	GN=Cdc37	CDC37_MOUSE	4	8	12	-1
Huntingtin	GN=Htt	HD_MOUSE	4	5	9	-0.321928
Huntingtin-interacting protein 1 AC=Q8VD75 OS=Mus musculus (Mouse).	GN=Hip1	HIP1_MOUSE	7	0	7	N/A
Huntingtin-interacting protein 1-related protein AC=Q9JKY5 OS=Mus musculus (Mouse).	GN=Hip1r	HIP1R_MOUSE	4	7	11	-0.807355
Hydroxyacyl-coenzyme A dehydrogenase	GN=Hadh	HCDH_MOUSE	7	6	13	0.222392
Hydroxyacylglutathione hydrolase	GN=Hagh	GLO2_MOUSE	2	3	5	-0.584963
Hydroxysteroid (17-beta) dehydrogenase 11	GN=Hsd17b11	A8Y5N3_MOUSE	6	12	18	-1
Hydroxysteroid dehydrogenase-like protein 1 AC=Q8BTX9 OS=Mus musculus (Mouse).	GN=Hsdl1	HSDL1_MOUSE	2	2	4	0
Hypoxanthine guanine phosphoribosyl transferase 1	GN=Hprt1	B1B0W8_MOUSE	9	16	25	-0.830075
Iars2 protein AC=Q8R2M5 OS=Mus musculus (Mouse).	GN=Iars2	Q8R2M5_MOUSE	4	2	6	1
If kappa light chain AC=A2NHM3 OS=Mus musculus (Mouse).	GN=Igk-C	A2NHM3_MOUSE	8	1	9	3
Ig gamma-1 chain C region secreted form - Mus musculus (Mouse).		Cntm_P01868|IGHG1_MOUSE	11	0	11	N/A
Ig mu chain C region secreted form - Mus musculus (Mouse).		Cntm_P01872|MUC_MOUSE	18	4	22	2.16993
Igh protein AC=Q505N9 OS=Mus musculus (Mouse).	GN=Igh	Q505N9_MOUSE	2	0	2	N/A
IKAROS family zinc finger 3	GN=Ikzf3	B1AQE6_MOUSE	1	1	2	0
Ikbkb protein AC=Q05DR8 OS=Mus musculus (Mouse).	GN=Ikbkb	Q05DR8_MOUSE	4	5	9	-0.321928
Immediate early response 3-interacting protein 1 AC=Q9CR20 OS=Mus musculus (Mouse).	GN=Ier3ip1	IR3IP_MOUSE	2	1	3	1
Immunoglobulin superfamily member 6 AC=P0C6B7 OS=Mus musculus (Mouse).	GN=Igsf6	IGSF6_MOUSE	1	5	6	-2.32193
Immunoglobulin-binding protein 1	GN=Igbp1	IGBP1_MOUSE	1	3	4	-1.58496
Importin subunit alpha-3	GN=Kpna3	IMA3_MOUSE	5	1	6	2.32193
Importin subunit alpha-4	GN=Kpna4	IMA4_MOUSE	4	5	9	-0.321928
Importin subunit alpha-7	GN=Kpna6	IMA7_MOUSE	5	2	7	1.32193
Importin-11	GN=Ipo11	IPO11_MOUSE	3	1	4	1.58496
Importin-4	GN=Ipo4	IPO4_MOUSE	4	0	4	N/A
Importin-7	GN=Ipo7	IPO7_MOUSE	7	10	17	-0.514573
Importin-9	GN=Ipo9	IPO9_MOUSE	3	6	9	-1
Inactive phospholipase C-like protein 2	GN=Plcl2	PLCL2_MOUSE	2	6	8	-1.58496
Induced by contact to basement membrane 1 protein homolog AC=Q91YX0 OS=Mus musculus (Mouse).	GN=Icb1	ICB1_MOUSE	7	8	15	-0.192645
Inhibin beta A chain	GN=Inhba	INHBA_MOUSE	3	4	7	-0.415037
Inorganic pyrophosphatase	GN=Ppa1	IPYR_MOUSE	10	6	16	0.736966
Inosine triphosphate pyrophosphatase AC=Q9D892 OS=Mus musculus (Mouse).	GN=Itpa	ITPA_MOUSE	7	6	13	0.222392
Inosine-5'-monophosphate dehydrogenase 2	GN=Impdh2	IMDH2_MOUSE	7	6	13	0.222392
Inositol 1,4,5-triphosphate receptor 2	GN=Itpr2	B2KF90_MOUSE	7	5	12	0.485427
Inositol 1,4,5-triphosphate receptor-interacting protein	GN=Itprip	IPRI_MOUSE	8	7	15	0.192645
Inositol 1,4,5-trisphosphate receptor type 1	GN=Itpr1	ITPR1_MOUSE	4	1	5	2
Inositol hexakisphosphate and diphosphoinositol-pentakisphosphate kinase 2	GN=Hisppd1	VIP2_MOUSE	2	3	5	-0.584963
Inositol monophosphatase 2	GN=Impa2	IMPA2_MOUSE	6	5	11	0.263034
Inositol polyphosphate 1-phosphatase AC=P49442 OS=Mus musculus (Mouse).	GN=Inpp1	INPP_MOUSE	5	3	8	0.736966
Inositol polyphosphate 5-phosphatase II AC=O54996 OS=Mus musculus (Mouse).	GN=Inpp5b	O54996_MOUSE	1	2	3	-1
Inositol-3-phosphate synthase 1	GN=Isyna1	INO1_MOUSE	2	4	6	-1
Insulin-like growth factor 2 receptor AC=B7ZWC4 OS=Mus musculus (Mouse).	GN=Igf2r	B7ZWC4_MOUSE	4	4	8	0
Integrator complex subunit 1 AC=Q6P4S8 OS=Mus musculus (Mouse).	GN=Ints1	INT1_MOUSE	5	2	7	1.32193
Integrator complex subunit 2 AC=Q80UK8 OS=Mus musculus (Mouse).	GN=Ints2	INT2_MOUSE	3	0	3	N/A
Integrator complex subunit 3 AC=Q7TPD0 OS=Mus musculus (Mouse).	GN=Ints3	INT3_MOUSE	3	3	6	0
Integrator complex subunit 4 AC=Q8CIM8 OS=Mus musculus (Mouse).	GN=Ints4	INT4_MOUSE	3	2	5	0.584963
Integrator complex subunit 6	GN=Ints6	INT6_MOUSE	3	1	4	1.58496
Integrator complex subunit 7 AC=Q7TQK1 OS=Mus musculus (Mouse).	GN=Ints7	INT7_MOUSE	4	0	4	N/A
Integrin alpha 2b AC=B2RPR7 OS=Mus musculus (Mouse).	GN=Itga2b	B2RPR7_MOUSE	18	1	19	4.16993
Integrin alpha-4	GN=Itga4	ITA4_MOUSE	1	2	3	-1
Integrin alpha-D AC=Q3V0T4 OS=Mus musculus (Mouse).	GN=Itgad	ITAD_MOUSE	9	0	9	N/A
Integrin alpha-X	GN=Itgax	ITAX_MOUSE	1	1	2	0
Integrin beta-1	GN=Itgb1	ITB1_MOUSE	6	1	7	2.58496
Integrin beta-3	GN=Itgb3	ITB3_MOUSE	7	3	10	1.22239
Integrin-linked kinase-associated serine/threonine phosphatase 2C AC=Q8R0F6 OS=Mus musculus (Mouse).	GN=Ilkap	ILKAP_MOUSE	2	3	5	-0.584963
Inter-alpha-trypsin inhibitor heavy chain H5 AC=Q8BJD1 OS=Mus musculus (Mouse).	GN=Itih5	ITIH5_MOUSE	0	4	4	N/A
Interferon gamma induced GTPase AC=Q811M6 OS=Mus musculus (Mouse).	GN=Igtp	Q811M6_MOUSE	3	1	4	1.58496
Interferon induced transmembrane protein 6 AC=Q3SXF0 OS=Mus musculus (Mouse).	GN=Ifitm6	Q3SXF0_MOUSE	2	5	7	-1.32193
Interferon-induced guanylate-binding protein 1	GN=Gbp1	GBP1_MOUSE	3	0	3	N/A
Interferon-induced guanylate-binding protein 2	GN=Gbp2	GBP2_MOUSE	5	4	9	0.321928
Interferon-induced protein with tetratricopeptide repeats 1	GN=Ifit1	IFIT1_MOUSE	2	0	2	N/A
Interferon-stimulated gene 20 kDa protein	GN=Isg20	ISG20_MOUSE	2	2	4	0
Interleukin 1 family	GN=Il1f9	Q3U0P4_MOUSE	11	11	22	0
Interleukin enhancer-binding factor 3 AC=Q9Z1X4 OS=Mus musculus (Mouse).	GN=Ilf3	ILF3_MOUSE	5	4	9	0.321928
Interleukin-1 receptor-associated kinase 3	GN=Irak3	IRAK3_MOUSE	2	4	6	-1
Interleukin-1 receptor-associated kinase 4 AC=Q8R4K2 OS=Mus musculus (Mouse).	GN=Irak4	IRAK4_MOUSE	4	3	7	0.415037
IQ motif and SEC7 domain-containing protein 1 AC=Q8R0S2 OS=Mus musculus (Mouse).	GN=Iqsec1	IQEC1_MOUSE	4	1	5	2
Isoamyl acetate-hydrolyzing esterase 1 homolog AC=Q9DB29 OS=Mus musculus (Mouse).	GN=Iah1	IAH1_MOUSE	1	3	4	-1.58496
Isobutyryl-CoA dehydrogenase	GN=Acad8	ACAD8_MOUSE	3	0	3	N/A
Isoc2a protein AC=B2RY90 OS=Mus musculus (Mouse).	GN=Isoc2a	B2RY90_MOUSE	3	1	4	1.58496
Isochorismatase domain-containing protein 1 AC=Q91V64 OS=Mus musculus (Mouse).	GN=Isoc1	ISOC1_MOUSE	4	4	8	0
Isocitrate dehydrogenase [NAD] subunit alpha	GN=Idh3a	IDH3A_MOUSE	13	6	19	1.11548
Isocitrate dehydrogenase [NAD] subunit gamma	GN=Idh3g	IDH3G_MOUSE	4	3	7	0.415037
Isocitrate dehydrogenase 3 (NAD+) beta	GN=Idh3b	Q91VA7_MOUSE	10	5	15	1
Isoleucine-tRNA synthetase	GN=Iars	Q6NXK4_MOUSE	12	3	15	2
Isovaleryl coenzyme A dehydrogenase AC=A3KGG9 OS=Mus musculus (Mouse).	GN=Ivd	A3KGG9_MOUSE	3	3	6	0
IST1 homolog AC=Q9CX00 OS=Mus musculus (Mouse).	GN=Ist1	IST1_MOUSE	2	3	5	-0.584963
Itchy	GN=Itch	A2AVS0_MOUSE	3	1	4	1.58496
Itsn2 protein AC=B2RR82 OS=Mus musculus (Mouse).	GN=Itsn2	B2RR82_MOUSE	9	6	15	0.584963
Jacobsen syndrome region 2 protein AC=A0EQY3 OS=Mus musculus (Mouse).	GN=Ncapd3	A0EQY3_MOUSE	3	5	8	-0.736966
JNK-interacting leucine zipper protein long form AC=B8X349 OS=Mus musculus (Mouse).	GN=cytb	B8X349_MOUSE	3	1	4	1.58496
Jumonji domain containing 1B AC=B9EKS2 OS=Mus musculus (Mouse).	GN=Jmjd1b	B9EKS2_MOUSE	3	2	5	0.584963
Kappa light chain variable region AC=Q5F2I7 OS=Mus musculus (Mouse).	GN=IgG1 TS1 VL	Q5F2I7_MOUSE	4	0	4	N/A
Kelch domain-containing protein 4 AC=Q921I2 OS=Mus musculus (Mouse).	GN=Klhdc4	KLDC4_MOUSE	1	3	4	-1.58496
KH domain containing	GN=Khdrbs1	B2KG38_MOUSE	8	3	11	1.41504
Kinesin light chain 1 AC=O88447 OS=Mus musculus (Mouse).	GN=Klc1	KLC1_MOUSE	3	1	4	1.58496
Kinesin light chain 4	GN=Klc4	KLC4_MOUSE	4	2	6	1
Kinesin-like protein KIF15	GN=Kif15	KIF15_MOUSE	3	1	4	1.58496
Kinesin-like protein KIF2A AC=P28740 OS=Mus musculus (Mouse).	GN=Kif2a	KIF2A_MOUSE	2	1	3	1
Kinesin-like protein KIF3B	GN=Kif3b	KIF3B_MOUSE	3	2	5	0.584963
Kinetochore-associated protein 1 AC=Q8C3Y4 OS=Mus musculus (Mouse).	GN=Kntc1	KNTC1_MOUSE	1	4	5	-2
Kininogen-1	GN=Kng1	KNG1_MOUSE	2	2	4	0
KLRAQ motif containing 1 AC=B2RPZ6 OS=Mus musculus (Mouse).	GN=Klraq1	B2RPZ6_MOUSE	3	1	4	1.58496
L1 cell adhesion molecule AC=A2AFG7 OS=Mus musculus (Mouse).	GN=L1cam	A2AFG7_MOUSE	1	8	9	-3
Lactb protein AC=Q80UJ8 OS=Mus musculus (Mouse).	GN=Lactb	Q80UJ8_MOUSE	4	2	6	1
LAG1 longevity assurance homolog 2	GN=Lass2	LASS2_MOUSE	4	3	7	0.415037
Lamina-associated polypeptide 1B AC=Q1EQW1 OS=Mus musculus (Mouse).	GN=Tor1aip1	Q1EQW1_MOUSE	13	9	22	0.530515
Lamin-B receptor	GN=Lbr	LBR_MOUSE	17	18	35	-0.0824622
Laminin receptor AC=B2CY77 OS=Mus musculus (Mouse).	GN=Rpsa	B2CY77_MOUSE	17	13	30	0.387023
LanC-like protein 2	GN=Lancl2	LANC2_MOUSE	3	5	8	-0.736966
La-related protein 1	GN=Larp1	LARP1_MOUSE	4	3	7	0.415037
Large proline-rich protein BAT2	GN=Bat2	BAT2_MOUSE	2	2	4	0
Large proline-rich protein BAT3	GN=Bat3	BAT3_MOUSE	5	2	7	1.32193
LAS1-like (S. cerevisiae) AC=A2BE28 OS=Mus musculus (Mouse).	GN=Las1l	A2BE28_MOUSE	3	0	3	N/A
Lectin	GN=Lgals9	B1AQR8_MOUSE	3	2	5	0.584963
Lectin-like transmembrane protein	GN=Klra17	Q6IVG2_MOUSE	4	3	7	0.415037
LETM1 and EF-hand domain-containing protein 1	GN=Letm1	LETM1_MOUSE	15	3	18	2.32193
Leucine carboxyl methyltransferase 1	GN=Lcmt1	A2RTH5_MOUSE	4	5	9	-0.321928
Leucine rich repeat containing 25	GN=Lrrc25	B9EHD0_MOUSE	1	2	3	-1
Leucine rich repeat containing 47 AC=B1AX98 OS=Mus musculus (Mouse).	GN=Lrrc47	B1AX98_MOUSE	4	7	11	-0.807355
Leucine zipper and CTNNBIP1 domain containing	GN=Lzic	B1AS02_MOUSE	3	1	4	1.58496
Leucine-rich alpha-2-glycoprotein	GN=Lrg1	Q91XL1_MOUSE	10	12	22	-0.263034
Leucine-rich PPR motif-containing protein	GN=Lrpprc	LPPRC_MOUSE	13	3	16	2.11548
Leucine-rich repeat and calponin homology domain-containing protein 4 AC=Q921G6 OS=Mus musculus (Mouse).	GN=Lrch4	LRCH4_MOUSE	7	9	16	-0.36257
Leucine-rich repeat and WD repeat-containing protein 1 AC=Q8BUI3 OS=Mus musculus (Mouse).	GN=Lrwd1	LRWD1_MOUSE	3	1	4	1.58496
Leucine-rich repeat serine/threonine-protein kinase 2 AC=Q5S006 OS=Mus musculus (Mouse).	GN=Lrrk2	LRRK2_MOUSE	5	8	13	-0.678072
Leucine-rich repeat-containing protein 40 AC=Q9CRC8 OS=Mus musculus (Mouse).	GN=Lrrc40	LRC40_MOUSE	4	1	5	2
Leucine-rich repeat-containing protein 59 AC=Q922Q8 OS=Mus musculus (Mouse).	GN=Lrrc59	LRC59_MOUSE	9	7	16	0.36257
Leucyl-cystinyl aminopeptidase	GN=Lnpep	LCAP_MOUSE	7	5	12	0.485427
Leukocyte immunoglobulin-like receptor subfamily B member 4	GN=Lilrb4	LIRB4_MOUSE	3	4	7	-0.415037
Leukocyte surface antigen CD47	GN=Cd47	CD47_MOUSE	7	5	12	0.485427
Leukosialin	GN=Spn	LEUK_MOUSE	7	5	12	0.485427
Leukotriene-B(4) omega-hydroxylase 2	GN=Cyp4f3	CP4F3_MOUSE	11	2	13	2.45943
Leupaxin AC=Q99N69 OS=Mus musculus (Mouse).	GN=Lpxn	LPXN_MOUSE	4	0	4	N/A
LIM and senescent cell antigen-like domains 1 isoform D AC=A8CVP1 OS=Mus musculus (Mouse).	GN=Lims1	A8CVP1_MOUSE	9	10	19	-0.152003
LIM and SH3 domain protein 1	GN=Lasp1	LASP1_MOUSE	6	7	13	-0.222392
Lipase	GN=Lipg	C0LQ91_MOUSE	6	2	8	1.58496
Lipopolysaccharide-binding protein AC=Q61805 OS=Mus musculus (Mouse).	GN=Lbp	LBP_MOUSE	0	5	5	N/A
LOC207685 protein AC=A4FU62 OS=Mus musculus (Mouse).	GN=Igl-V2	A4FU62_MOUSE	10	1	11	3.32193
Lon protease homolog	GN=Lonp1	LONM_MOUSE	11	8	19	0.459432
Long-chain specific acyl-CoA dehydrogenase	GN=Acadl	ACADL_MOUSE	15	9	24	0.736966
Long-chain-fatty-acid--CoA ligase 4	GN=Acsl4	ACSL4_MOUSE	1	4	5	-2
Longevity assurance homolog 6 (S. cerevisiae) AC=A2AUS9 OS=Mus musculus (Mouse).	GN=Lass6	A2AUS9_MOUSE	1	4	5	-2
Loss of heterozygosity 11 chromosomal region 2 gene A protein homolog AC=Q99KC8 OS=Mus musculus (Mouse).	GN=Loh11cr2a	LHR2A_MOUSE	7	5	12	0.485427
Low affinity immunoglobulin gamma Fc region receptor II	GN=Fcgr2	FCGR2_MOUSE	5	1	6	2.32193
Low affinity immunoglobulin gamma Fc region receptor III	GN=Fcgr3	FCGR3_MOUSE	4	6	10	-0.584963
Low affinity sodium-glucose cotransporter	GN=Slc5a4a	SC5A4_MOUSE	0	3	3	N/A
Lpcat2 protein AC=B2RWR2 OS=Mus musculus (Mouse).	GN=Lpcat2	B2RWR2_MOUSE	5	11	16	-1.1375
Lrch4 protein AC=Q8K381 OS=Mus musculus (Mouse).	GN=Lrch4	Q8K381_MOUSE	6	5	11	0.263034
LSM14 homolog A (SCD6	GN=Lsm14a	A2BH30_MOUSE	4	1	5	2
LSM14 homolog A (SCD6	GN=Lsm14a	A2BH68_MOUSE	3	0	3	N/A
LTB4 receptor AC=A7VJD3 OS=Mus musculus (Mouse).	GN=Ltb4r1	A7VJD3_MOUSE	2	1	3	1
Lupus La protein homolog	GN=Ssb	LA_MOUSE	7	13	20	-0.893085
Lymphocyte antigen 75 AC=A2AW86 OS=Mus musculus (Mouse).	GN=Ly75	A2AW86_MOUSE	5	6	11	-0.263034
Lymphocyte cytosolic protein 2 AC=B1ATD2 OS=Mus musculus (Mouse).	GN=Lcp2	B1ATD2_MOUSE	8	7	15	0.192645
Lymphoid-restricted membrane protein	GN=Lrmp	LRMP_MOUSE	9	6	15	0.584963
Lys-63-specific deubiquitinase BRCC36	GN=Brcc3	BRCC3_MOUSE	6	5	11	0.263034
Lysine-specific demethylase 6B	GN=Kdm6b	KDM6B_MOUSE	1	2	3	-1
Lysophosphatidylcholine acyltransferase 1	GN=Lpcat1	PCAT1_MOUSE	4	3	7	0.415037
Lysophosphatidylcholine acyltransferase 2	GN=Lpcat2	PCAT2_MOUSE	6	11	17	-0.874469
Lysophospholipase 2	GN=Lypla2	B1AV56_MOUSE	9	7	16	0.36257
Lysosomal acid lipase/cholesteryl ester hydrolase	GN=Lipa	LICH_MOUSE	9	8	17	0.169925
Lysosomal membrane glycoprotein 2	GN=Lamp2	A2A430_MOUSE	9	6	15	0.584963
Lysosomal protective protein	GN=Ctsa	PPGB_MOUSE	6	3	9	1
Lysosomal Pro-X carboxypeptidase	GN=Prcp	PCP_MOUSE	3	4	7	-0.415037
Lysosomal-trafficking regulator	GN=Lyst	LYST_MOUSE	3	3	6	0
Lysosome-associated membrane glycoprotein 1	GN=Lamp1	LAMP1_MOUSE	4	4	8	0
Lysozyme C-1	GN=Lyz1	LYZ1_MOUSE	5	6	11	-0.263034
Lysozyme C-2	GN=Lyz2	LYZ2_MOUSE	57	169	226	-1.56799
Lysyl-tRNA synthetase AC=Q3TIV6 OS=Mus musculus (Mouse).	GN=Kars	Q3TIV6_MOUSE	7	11	18	-0.652077
Macrophage colony-stimulating factor 1 receptor	GN=Csf1r	CSF1R_MOUSE	3	0	3	N/A
Macrophage galactose N-acetyl-galactosamine specific lectin 2 isoform i AC=A9XX86 OS=Mus musculus (Mouse).	GN=Mgl2	A9XX86_MOUSE	4	0	4	N/A
Macrophage migration inhibitory factor	GN=Mif	MIF_MOUSE	7	6	13	0.222392
Macrophage-expressed gene 1 protein AC=A1L314 OS=Mus musculus (Mouse).	GN=Mpeg1	MPEG1_MOUSE	6	1	7	2.58496
Magnesium transporter 1	GN=Magt1	A2ADH0_MOUSE	3	1	4	1.58496
MAGUK p55 subfamily member 7 AC=Q8BVD5 OS=Mus musculus (Mouse).	GN=Mpp7	MPP7_MOUSE	1	2	3	-1
Malate dehydrogenase	GN=Mdh1	MDHC_MOUSE	9	12	21	-0.415037
Malectin AC=Q6ZQI3 OS=Mus musculus (Mouse).	GN=Mlec	MLEC_MOUSE	7	8	15	-0.192645
Malignant T cell amplified sequence 1	GN=Mcts1	MCTS1_MOUSE	1	4	5	-2
Mannose-1-phosphate guanyltransferase alpha	GN=Gmppa	GMPPA_MOUSE	2	4	6	-1
Mannose-1-phosphate guanyltransferase beta	GN=Gmppb	GMPPB_MOUSE	4	7	11	-0.807355
Mannose-6-phosphate isomerase	GN=Mpi	MPI_MOUSE	1	2	3	-1
Mannose-6-phosphate receptor-binding protein 1	GN=M6prbp1	M6PBP_MOUSE	12	11	23	0.125531
Mannose-P-dolichol utilization defect 1 protein	GN=Mpdu1	MPU1_MOUSE	2	4	6	-1
Mannosidase 2	GN=Man2a1	B9EHS6_MOUSE	16	9	25	0.830075
Mannosyl-oligosaccharide glucosidase	GN=Mogs	MOGS_MOUSE	8	5	13	0.678072
Mast cell-expressed membrane protein 1 homolog AC=Q9D8U6 OS=Mus musculus (Mouse).	GN=Mcemp1	MCEM1_MOUSE	5	7	12	-0.485427
Matrin-3 AC=Q8K310 OS=Mus musculus (Mouse).	GN=Matr3	MATR3_MOUSE	9	7	16	0.36257
Matrix metalloproteinase-25 AC=Q3U435 OS=Mus musculus (Mouse).	GN=Mmp25	MMP25_MOUSE	1	4	5	-2
MC3T3-E1 calcyclin	GN=S100a6	Q545I9_MOUSE	2	3	5	-0.584963
MCG1040650	GN=Stoml2	A2AG40_MOUSE	9	6	15	0.584963
MCG113697	GN=1110005A23Rik	B2RXM7_MOUSE	2	2	4	0
MCG125789	GN=Taok3	B2RY27_MOUSE	6	7	13	-0.222392
MCG130182	GN=EG433016	B2RV77_MOUSE	39	10	49	1.96347
MCG13615	GN=Rpl38	Q52KP0_MOUSE	4	0	4	N/A
MCG14148	GN=AU014645	B1AWH4_MOUSE	3	9	12	-1.58496
MCG15924	GN=Skiv2l	O70349_MOUSE	2	3	5	-0.584963
MCG17262	GN=Pdap1	B2RTB0_MOUSE	4	2	6	1
MCG17981	GN=Prpf38a	B2RTE3_MOUSE	1	2	3	-1
MCG19514	GN=Wdr82	B2RXQ8_MOUSE	1	5	6	-2.32193
MCG2303	GN=Tex10	Q3URQ0_MOUSE	2	2	4	0
MCG2706	GN=Txn1	A2AV97_MOUSE	128	130	258	-0.0223678
MCG6542	GN=Rps6	Q5BLK1_MOUSE	2	1	3	1
Mediator of RNA polymerase II transcription subunit 16	GN=Med16	MED16_MOUSE	1	2	3	-1
Medium-chain specific acyl-CoA dehydrogenase	GN=Acadm	ACADM_MOUSE	7	2	9	1.80735
Melanoma inhibitory activity protein 3	GN=Mia3	MIA3_MOUSE	9	2	11	2.16993
Membrane protein	GN=Mpp1	A2AN84_MOUSE	6	6	12	0
Membrane-associated progesterone receptor component 2 AC=Q80UU9 OS=Mus musculus (Mouse).	GN=Pgrmc2	PGRC2_MOUSE	3	5	8	-0.736966
membrane-bound form - Mus musculus (Mouse).	Ig gamma-3 chain C region	Cntm_P03987|GC3M_MOUSE	3	0	3	N/A
Metal transporter CNNM4	GN=Cnnm4	CNNM4_MOUSE	1	2	3	-1
Metalloreductase STEAP4	GN=Steap4	STEA4_MOUSE	4	0	4	N/A
Methionine adenosyltransferase 2 subunit beta	GN=Mat2b	MAT2B_MOUSE	4	6	10	-0.584963
Methionine aminopeptidase 1	GN=Metap1	AMPM1_MOUSE	4	1	5	2
Methionine aminopeptidase 2	GN=Metap2	AMPM2_MOUSE	11	11	22	0
Methionyl-tRNA synthetase	GN=Mars	SYMC_MOUSE	6	9	15	-0.584963
Methylcrotonoyl-CoA carboxylase subunit alpha	GN=Mccc1	MCCA_MOUSE	4	0	4	N/A
Methylosome protein 50	GN=Wdr77	MEP50_MOUSE	2	2	4	0
Methylthioadenosine phosphorylase	GN=Mtap	A2ANM4_MOUSE	4	1	5	2
Methyltransferase-like protein 9	GN=Mettl9	METL9_MOUSE	1	3	4	-1.58496
MFLJ00087 protein AC=Q6KAS9 OS=Mus musculus (Mouse).	GN=A430107D22Rik	Q6KAS9_MOUSE	2	2	4	0
MFLJ00316 protein AC=Q6KAN1 OS=Mus musculus (Mouse).	GN=Gbp6	Q6KAN1_MOUSE	2	3	5	-0.584963
Microrchidia 3 AC=A6H605 OS=Mus musculus (Mouse).	GN=Morc3	A6H605_MOUSE	3	2	5	0.584963
Microtubule-actin crosslinking factor 1 AC=B1ARU1 OS=Mus musculus (Mouse).	GN=Macf1	B1ARU1_MOUSE	7	3	10	1.22239
Microtubule-actin crosslinking factor 1 AC=B1ARU4 OS=Mus musculus (Mouse).	GN=Macf1	B1ARU4_MOUSE	7	3	10	1.22239
Microtubule-associated protein 1S AC=B2RWW1 OS=Mus musculus (Mouse).	GN=Mtap1s	B2RWW1_MOUSE	2	2	4	0
Microtubule-associated protein 4 AC=Q8CFP5 OS=Mus musculus (Mouse).	GN=Map4	MAP4_MOUSE	9	10	19	-0.152003
Microtubule-associated protein RP/EB family member 1	GN=Mapre1	MARE1_MOUSE	8	12	20	-0.584963
Microtubule-associated protein RP/EB family member 2	GN=Mapre2	MARE2_MOUSE	3	3	6	0
Midasin homolog (Yeast) AC=A2ANY6 OS=Mus musculus (Mouse).	GN=Mdn1	A2ANY6_MOUSE	6	2	8	1.58496
Mitochondrial 2-oxoglutarate/malate carrier protein	GN=Slc25a11	M2OM_MOUSE	5	10	15	-1
Mitochondrial carnitine/acylcarnitine carrier protein	GN=Slc25a20	MCAT_MOUSE	2	3	5	-0.584963
Mitochondrial carrier homolog 2 (C. elegans) AC=A2AFW6 OS=Mus musculus (Mouse).	GN=Mtch2	A2AFW6_MOUSE	1	2	3	-1
Mitochondrial fission 1 protein	GN=Fis1	FIS1_MOUSE	3	6	9	-1
Mitochondrial import inner membrane translocase subunit TIM50 AC=Q9D880 OS=Mus musculus (Mouse).	GN=Timm50	TIM50_MOUSE	3	3	6	0
Mitochondrial import receptor subunit TOM34	GN=Tomm34	TOM34_MOUSE	7	3	10	1.22239
Mitochondrial Rho GTPase 2	GN=Rhot2	MIRO2_MOUSE	3	1	4	1.58496
Mitochondrial ribosomal protein S30 AC=B2KF79 OS=Mus musculus (Mouse).	GN=Mrps30	B2KF79_MOUSE	2	1	3	1
Mitogen activated protein kinase kinase 6 AC=A2AGS2 OS=Mus musculus (Mouse).	GN=Map2k6	A2AGS2_MOUSE	1	2	3	-1
Mitogen-activated protein kinase 13	GN=Mapk13	MK13_MOUSE	3	3	6	0
Mitogen-activated protein kinase 7	GN=Mapk7	MK07_MOUSE	3	1	4	1.58496
Mitogen-activated protein kinase kinase kinase 5	GN=Map3k5	M3K5_MOUSE	1	2	3	-1
Mitogen-activated protein kinase kinase kinase kinase 1	GN=Map4k1	M4K1_MOUSE	2	1	3	1
Mitogen-activated protein kinase kinase kinase kinase 2	GN=Map4k2	M4K2_MOUSE	0	5	5	N/A
Mitogen-activated protein kinase-activated protein kinase 3	GN=Mapkapk3	B0QZU7_MOUSE	3	5	8	-0.736966
Mitogen-activated protein-binding protein-interacting protein	GN=Robld3	MAPIP_MOUSE	3	3	6	0
Mitotic checkpoint protein BUB3	GN=Bub3	BUB3_MOUSE	7	7	14	0
Mitotic spindle assembly checkpoint protein MAD2A	GN=Mad2l1	MD2L1_MOUSE	1	4	5	-2
MKIAA0044 protein AC=Q6ZQK4 OS=Mus musculus (Mouse).	GN=Ppp2r5c	Q6ZQK4_MOUSE	4	4	8	0
MKIAA0097 protein AC=Q80U79 OS=Mus musculus (Mouse).	GN=Ckap5	Q80U79_MOUSE	3	9	12	-1.58496
MKIAA0103 protein	GN=Ttc35	Q6A0D1_MOUSE	4	0	4	N/A
MKIAA0126 protein AC=Q6A0C5 OS=Mus musculus (Mouse).	GN=Ube4a	Q6A0C5_MOUSE	1	2	3	-1
MKIAA0310 protein	GN=Sec16a	Q80U43_MOUSE	3	2	5	0.584963
MKIAA0577 protein AC=Q80TX4 OS=Mus musculus (Mouse).	GN=Dhx16	Q80TX4_MOUSE	2	1	3	1
MKIAA0639 protein AC=Q6A029 OS=Mus musculus (Mouse).	GN=Kif13b	Q6A029_MOUSE	4	2	6	1
MKIAA0838 protein AC=Q69ZX9 OS=Mus musculus (Mouse).	GN=Gls	Q69ZX9_MOUSE	8	2	10	2
MKIAA0866 protein AC=Q69ZX3 OS=Mus musculus (Mouse).	GN=Myh11	Q69ZX3_MOUSE	30	38	68	-0.341037
MKIAA1012 protein AC=Q69ZT3 OS=Mus musculus (Mouse).	GN=D030074E01Rik	Q69ZT3_MOUSE	6	4	10	0.584963
MKIAA1015 protein AC=Q69ZT2 OS=Mus musculus (Mouse).	GN=Zkscan5	Q69ZT2_MOUSE	1	1	2	0
MKIAA1240 protein AC=Q571M9 OS=Mus musculus (Mouse).	GN=Atad2b	Q571M9_MOUSE	3	0	3	N/A
MKIAA1435 protein AC=Q5DTX9 OS=Mus musculus (Mouse).	GN=Wdfy1	Q5DTX9_MOUSE	5	4	9	0.321928
MKIAA1833 protein AC=Q80T84 OS=Mus musculus (Mouse).	GN=D330001F17Rik	Q80T84_MOUSE	3	0	3	N/A
MKIAA1835 protein AC=Q6ZPH4 OS=Mus musculus (Mouse).	GN=Rangap1	Q6ZPH4_MOUSE	11	4	15	1.45943
MKIAA1850 protein AC=Q80T83 OS=Mus musculus (Mouse).	GN=Vcpip1	Q80T83_MOUSE	2	5	7	-1.32193
MKIAA3013 protein AC=Q6ZPE9 OS=Mus musculus (Mouse).	GN=Sfrs2ip	Q6ZPE9_MOUSE	4	1	5	2
MKIAA4036 protein AC=Q571B0 OS=Mus musculus (Mouse).	GN=Tm9sf3	Q571B0_MOUSE	7	6	13	0.222392
MKIAA4126 protein AC=Q570Z7 OS=Mus musculus (Mouse).	GN=Sin3a	Q570Z7_MOUSE	8	5	13	0.678072
MKIAA4137 protein AC=Q5DTL8 OS=Mus musculus (Mouse).	GN=Sel1l	Q5DTL8_MOUSE	5	1	6	2.32193
MKIAA4216 protein AC=Q5DTH1 OS=Mus musculus (Mouse).	GN=Ube3a	Q5DTH1_MOUSE	5	3	8	0.736966
MMS19 nucleotide excision repair protein homolog	GN=Mms19	MMS19_MOUSE	7	3	10	1.22239
Molybdenum cofactor biosynthesis protein 1	GN=Mocs1	MOCS1_MOUSE	4	2	6	1
Molybdenum cofactor sulfurase AC=Q14CH1 OS=Mus musculus (Mouse).	GN=Mocos	MOCOS_MOUSE	6	4	10	0.584963
Monocyte differentiation antigen CD14	GN=Cd14	CD14_MOUSE	6	5	11	0.263034
Monoglyceride lipase AC=O35678 OS=Mus musculus (Mouse).	GN=Mgll	MGLL_MOUSE	2	2	4	0
MOSC domain-containing protein 2	GN=Mosc2	MOSC2_MOUSE	7	2	9	1.80735
Motile sperm domain containing 2 AC=B1AU72 OS=Mus musculus (Mouse).	GN=Mospd2	B1AU72_MOUSE	4	3	7	0.415037
Mps one binder kinase activator-like 1A	GN=Mobkl1a	MOL1A_MOUSE	3	5	8	-0.736966
Mps one binder kinase activator-like 3	GN=Mobkl3	MOBL3_MOUSE	3	3	6	0
mRNA cap guanine-N7 methyltransferase	GN=Rnmt	MCES_MOUSE	5	2	7	1.32193
mRNA-decapping enzyme 1A	GN=Dcp1a	DCP1A_MOUSE	2	1	3	1
Multifunctional protein ADE2	GN=Paics	PUR6_MOUSE	8	10	18	-0.321928
Multiple coagulation factor deficiency protein 2 homolog	GN=Mcfd2	MCFD2_MOUSE	4	0	4	N/A
Multisynthetase complex auxiliary component p38	GN=Jtv1	MCA2_MOUSE	4	1	5	2
Multisynthetase complex auxiliary component p43	GN=Scye1	MCA1_MOUSE	8	4	12	1
Murinoglobulin-1 AC=P28665 OS=Mus musculus (Mouse).	GN=Mug1	MUG1_MOUSE	4	1	5	2
Muscleblind-like protein 1	GN=Mbnl1	MBNL1_MOUSE	1	4	5	-2
Myc box-dependent-interacting protein 1	GN=Bin1	BIN1_MOUSE	1	2	3	-1
Myeloblastin	GN=Prtn3	PRTN3_MOUSE	29	26	55	0.157541
Myeloid-associated differentiation marker	GN=Myadm	MYADM_MOUSE	2	2	4	0
Myo18a protein AC=B2RRE2 OS=Mus musculus (Mouse).	GN=Myo18a	B2RRE2_MOUSE	14	10	24	0.485427
Myosin Va AC=B8JK03 OS=Mus musculus (Mouse).	GN=Myo5a	B8JK03_MOUSE	4	6	10	-0.584963
Myosin VIIB AC=B9EHR5 OS=Mus musculus (Mouse).	GN=Myo7b	B9EHR5_MOUSE	2	1	3	1
Myosin-10	GN=Myh10	MYH10_MOUSE	32	41	73	-0.357552
Myosin-9	GN=Myh9	MYH9_MOUSE	338	450	788	-0.412902
Myosin-IXb	GN=Myo9b	MYO9B_MOUSE	7	11	18	-0.652077
Myosin-Vb AC=P21271 OS=Mus musculus (Mouse).	GN=Myo5b	MYO5B_MOUSE	2	1	3	1
Myosin-XV	GN=Myo15a	MYO15_MOUSE	1	2	3	-1
Myotrophin	GN=Mtpn	MTPN_MOUSE	4	3	7	0.415037
Myotubularin related protein 3 AC=B1ATD4 OS=Mus musculus (Mouse).	GN=Mtmr3	B1ATD4_MOUSE	8	5	13	0.678072
Myotubularin related protein 9 AC=A6H6P1 OS=Mus musculus (Mouse).	GN=Mtmr9	A6H6P1_MOUSE	1	3	4	-1.58496
Myotubularin-related protein 12 AC=Q80TA6 OS=Mus musculus (Mouse).	GN=Mtmr12	MTMRC_MOUSE	2	2	4	0
Myotubularin-related protein 6 AC=Q8VE11 OS=Mus musculus (Mouse).	GN=Mtmr6	MTMR6_MOUSE	2	3	5	-0.584963
Myristoylated alanine-rich C-kinase substrate AC=P26645 OS=Mus musculus (Mouse).	GN=Marcks	MARCS_MOUSE	6	6	12	0
Na(+)/H(+) exchange regulatory cofactor NHE-RF1	GN=Slc9a3r1	NHRF1_MOUSE	4	13	17	-1.70044
N-acetylgalactosamine kinase	GN=Galk2	GALK2_MOUSE	1	3	4	-1.58496
N-acetylgalactosamine-6-sulfatase	GN=Galns	GALNS_MOUSE	11	11	22	0
N-acetylglucosamine-6-sulfatase AC=Q8BFR4 OS=Mus musculus (Mouse).	GN=Gns	GNS_MOUSE	2	3	5	-0.584963
N-acetylneuraminate lyase	GN=Npl	NPL_MOUSE	2	2	4	0
N-acetylneuraminic acid synthase (Sialic acid synthase)	GN=Nans	Q99J77_MOUSE	4	5	9	-0.321928
N-acetyltransferase 10 AC=Q8K224 OS=Mus musculus (Mouse).	GN=Nat10	NAT10_MOUSE	9	0	9	N/A
N-acylneuraminate cytidylyltransferase	GN=Cmas	NEUA_MOUSE	1	3	4	-1.58496
NAD kinase	GN=Nadk	Q3TCP7_MOUSE	5	9	14	-0.847997
NAD(P) transhydrogenase	GN=Nnt	NNTM_MOUSE	10	6	16	0.736966
NAD-dependent malic enzyme	GN=Me2	MAOM_MOUSE	14	7	21	1
NADH dehydrogenase (Ubiquinone) 1 alpha subcomplex	GN=Ndufa8	A2AL45_MOUSE	4	3	7	0.415037
NADH dehydrogenase [ubiquinone] 1 alpha subcomplex subunit 10	GN=Ndufa10	NDUAA_MOUSE	7	1	8	2.80735
NADH dehydrogenase [ubiquinone] 1 alpha subcomplex subunit 11	GN=Ndufa11	NDUAB_MOUSE	4	3	7	0.415037
NADH dehydrogenase [ubiquinone] 1 alpha subcomplex subunit 12	GN=Ndufa12	NDUAC_MOUSE	3	0	3	N/A
NADH dehydrogenase [ubiquinone] 1 alpha subcomplex subunit 13	GN=Ndufa13	NDUAD_MOUSE	5	2	7	1.32193
NADH dehydrogenase [ubiquinone] 1 alpha subcomplex subunit 9	GN=Ndufa9	NDUA9_MOUSE	4	1	5	2
NADH dehydrogenase [ubiquinone] 1 beta subcomplex subunit 10	GN=Ndufb10	NDUBA_MOUSE	3	3	6	0
NADH dehydrogenase [ubiquinone] 1 beta subcomplex subunit 5	GN=Ndufb5	NDUB5_MOUSE	2	2	4	0
NADH dehydrogenase [ubiquinone] 1 beta subcomplex subunit 9	GN=Ndufb9	NDUB9_MOUSE	3	1	4	1.58496
NADH dehydrogenase [ubiquinone] 1 subunit C2	GN=Ndufc2	NDUC2_MOUSE	3	2	5	0.584963
NADH dehydrogenase [ubiquinone] flavoprotein 1	GN=Ndufv1	NDUV1_MOUSE	8	4	12	1
NADH dehydrogenase [ubiquinone] flavoprotein 2	GN=Ndufv2	NDUV2_MOUSE	5	3	8	0.736966
NADH dehydrogenase [ubiquinone] iron-sulfur protein 3	GN=Ndufs3	NDUS3_MOUSE	6	1	7	2.58496
NADH dehydrogenase [ubiquinone] iron-sulfur protein 6	GN=Ndufs6	NDUS6_MOUSE	3	1	4	1.58496
NADH dehydrogenase [ubiquinone] iron-sulfur protein 7	GN=Ndufs7	NDUS7_MOUSE	4	0	4	N/A
NADH dehydrogenase [ubiquinone] iron-sulfur protein 8	GN=Ndufs8	NDUS8_MOUSE	5	3	8	0.736966
NADH-cytochrome b5 reductase 1	GN=Cyb5r1	NB5R1_MOUSE	4	1	5	2
NADH-cytochrome b5 reductase 3	GN=Cyb5r3	NB5R3_MOUSE	5	4	9	0.321928
NADH-ubiquinone oxidoreductase 75 kDa subunit	GN=Ndufs1	NDUS1_MOUSE	17	6	23	1.5025
NADPH--cytochrome P450 reductase AC=P37040 OS=Mus musculus (Mouse).	GN=Por	NCPR_MOUSE	12	17	29	-0.5025
Napsin-A	GN=Napsa	NAPSA_MOUSE	7	3	10	1.22239
Nbas protein AC=Q6GQV6 OS=Mus musculus (Mouse).	GN=4933425L03Rik	Q6GQV6_MOUSE	3	0	3	N/A
Ncapg protein AC=B2RQA7 OS=Mus musculus (Mouse).	GN=Ncapg	B2RQA7_MOUSE	3	3	6	0
Ncor1 protein AC=Q5PRE9 OS=Mus musculus (Mouse).	GN=Ncor1	Q5PRE9_MOUSE	6	6	12	0
NEDD4-binding protein 1 AC=Q6A037 OS=Mus musculus (Mouse).	GN=N4bp1	N4BP1_MOUSE	3	3	6	0
NEDD8-conjugating enzyme Ubc12	GN=Ube2m	UBC12_MOUSE	2	4	6	-1
NEDD9-interacting protein with calponin homology and LIM domains	GN=Mical1	MICA1_MOUSE	6	10	16	-0.736966
Negative elongation factor A	GN=Whsc2	NELFA_MOUSE	1	3	4	-1.58496
Neighbor of COX4 AC=O70378 OS=Mus musculus (Mouse).	GN=Cox4nb	CX4NB_MOUSE	1	3	4	-1.58496
Nesprin-3 AC=Q4FZC9 OS=Mus musculus (Mouse).	GN=Nars	SYNE3_MOUSE	10	4	14	1.32193
Neural cell adhesion molecule 1 AC=Q9R2A7 OS=Mus musculus (Mouse).	GN=Ncam1	NCAM1_MOUSE	4	4	8	0
Neural cell expressed	GN=Nedd4	B2RSC8_MOUSE	4	5	9	-0.321928
Neurolysin	GN=Nln	NEUL_MOUSE	2	2	4	0
Neutrophil gelatinase-associated lipocalin	GN=Lcn2	NGAL_MOUSE	31	76	107	-1.29373
NFU1 iron-sulfur cluster scaffold homolog	GN=Nfu1	NFU1_MOUSE	3	1	4	1.58496
NHL repeat containing 2 AC=B2RR26 OS=Mus musculus (Mouse).	GN=Nhlrc2	B2RR26_MOUSE	3	4	7	-0.415037
NHP2-like protein 1	GN=Nhp2l1	NH2L1_MOUSE	1	5	6	-2.32193
NHS-like protein 2 AC=B1AXH1 OS=Mus musculus (Mouse).	GN=Nhsl2	NHSL2_MOUSE	2	5	7	-1.32193
Nicalin	GN=Ncln	NCLN_MOUSE	3	3	6	0
Nicotinamide phosphoribosyltransferase	GN=Nampt	NAMPT_MOUSE	10	5	15	1
Nicotinate phosphoribosyltransferase	GN=Naprt1	PNCB_MOUSE	2	2	4	0
NIMA (Never in mitosis gene a)-related expressed kinase 9 AC=Q148U2 OS=Mus musculus (Mouse).	GN=Nek9	Q148U2_MOUSE	2	2	4	0
Nin protein AC=B2RQ73 OS=Mus musculus (Mouse).	GN=Nin	B2RQ73_MOUSE	2	1	3	1
Nipped-B-like protein	GN=Nipbl	NIPBL_MOUSE	9	7	16	0.36257
Nipsnap homolog 3A (C. elegans) AC=B1AWZ4 OS=Mus musculus (Mouse).	GN=Nipsnap3a	B1AWZ4_MOUSE	4	1	5	2
Nischarin	GN=Nisch	NISCH_MOUSE	2	2	4	0
Nitric oxide synthase-interacting protein AC=Q9D6T0 OS=Mus musculus (Mouse).	GN=Nosip	NOSIP_MOUSE	1	2	3	-1
Nitrilase homolog 1 AC=Q8VDK1 OS=Mus musculus (Mouse).	GN=Nit1	NIT1_MOUSE	2	3	5	-0.584963
NLR family member X1 AC=Q3TL44 OS=Mus musculus (Mouse).	GN=Nlrx1	NLRX1_MOUSE	5	3	8	0.736966
NMDA receptor-regulated protein 1	GN=Narg1	NARG1_MOUSE	2	6	8	-1.58496
NmrA-like family domain-containing protein 1 AC=Q8K2T1 OS=Mus musculus (Mouse).	GN=Nmral1	NMRL1_MOUSE	2	5	7	-1.32193
Nodal modulator 1 AC=Q6GQT9 OS=Mus musculus (Mouse).	GN=Nomo1	Q6GQT9_MOUSE	8	7	15	0.192645
Nonmuscle myosin II-C2 AC=B3F3T1 OS=Mus musculus (Mouse).	GN=Myh14	B3F3T1_MOUSE	16	23	39	-0.523562
Non-syndromic hearing impairment protein 5 homolog AC=Q9Z2D3 OS=Mus musculus (Mouse).	GN=Dfna5	DFNA5_MOUSE	11	12	23	-0.125531
Normal mucosa of esophagus-specific gene 1 protein AC=Q810Q5 OS=Mus musculus (Mouse).	GN=Nmes1	NMES1_MOUSE	2	3	5	-0.584963
Novel protein	GN=2310003C23Rik	A2AJ50_MOUSE	4	3	7	0.415037
Novel protein (1500003O03Rik)	GN=1500003O03Rik	A2AQ13_MOUSE	2	5	7	-1.32193
Novel protein (2310003F16Rik)	GN=2310003F16Rik	A2ARQ7_MOUSE	2	2	4	0
Novel protein (2310014H01Rik) AC=B8JJ63 OS=Mus musculus (Mouse).	GN=RP24-180B11.3	B8JJ63_MOUSE	5	4	9	0.321928
Novel protein (2610510H03Rik) AC=A2ATZ4 OS=Mus musculus (Mouse).	GN=2610510H03Rik	A2ATZ4_MOUSE	5	2	7	1.32193
Novel protein (2810405J04Rik)	GN=RP23-333D13.1	B8JJG1_MOUSE	3	1	4	1.58496
Novel protein (5830434P21Rik) AC=A2AN31 OS=Mus musculus (Mouse).	GN=Bat2l	A2AN31_MOUSE	0	2	2	N/A
Novel protein silmilar to ribosomal protein L32	GN=EG245405	A2AD25_MOUSE	4	0	4	N/A
NSFL1 (P97) cofactor (P47) AC=A2AT03 OS=Mus musculus (Mouse).	GN=Nsfl1c	A2AT03_MOUSE	11	8	19	0.459432
Nub1 protein AC=A0PJ90 OS=Mus musculus (Mouse).	GN=Nub1	A0PJ90_MOUSE	4	1	5	2
Nuclear autoantigenic sperm protein (Histone-binding)	GN=Nasp	B1AU75_MOUSE	9	6	15	0.584963
Nuclear distribution gene C homolog (Aspergillus)	GN=Nudc	A2A9F5_MOUSE	3	5	8	-0.736966
Nuclear distribution protein nudE-like 1	GN=Ndel1	NDEL1_MOUSE	1	3	4	-1.58496
Nuclear factor NF-kappa-B p100 subunit	GN=Nfkb2	NFKB2_MOUSE	3	5	8	-0.736966
Nuclear factor of kappa light chain gene enhancer in B-cells 1	GN=Nfkb1	B2RRQ6_MOUSE	8	12	20	-0.584963
Nuclear pore complex protein Nup107	GN=Nup107	NU107_MOUSE	3	2	5	0.584963
Nuclear pore complex protein Nup214	GN=Nup214	NU214_MOUSE	6	4	10	0.584963
Nuclear pore complex protein Nup93	GN=Nup93	NUP93_MOUSE	12	3	15	2
Nuclear pore glycoprotein p62	GN=Nup62	NUP62_MOUSE	8	2	10	2
Nuclear protein localization 4 homolog (S. cerevisiae) AC=B1ATY4 OS=Mus musculus (Mouse).	GN=Nploc4	B1ATY4_MOUSE	3	5	8	-0.736966
Nuclear receptor corepressor 1	GN=Ncor1	NCOR1_MOUSE	6	6	12	0
Nuclear receptor-binding protein	GN=Nrbp1	NRBP_MOUSE	3	6	9	-1
Nuclear RNA export factor 1	GN=Nxf1	NXF1_MOUSE	7	5	12	0.485427
Nuclear ubiquitous casein and cyclin-dependent kinases substrate	GN=Nucks1	NUCKS_MOUSE	1	4	5	-2
Nuclear valosin-containing protein-like AC=Q9DBY8 OS=Mus musculus (Mouse).	GN=Nvl	NVL_MOUSE	5	1	6	2.32193
Nuclear-interacting partner of ALK	GN=Zc3hc1	NIPA_MOUSE	3	3	6	0
Nucleobindin-1	GN=Nucb1	NUCB1_MOUSE	13	5	18	1.37851
Nucleobindin-2	GN=Nucb2	NUCB2_MOUSE	8	8	16	0
Nucleolar protein 58	GN=Nop58	NOP58_MOUSE	20	2	22	3.32193
Nucleolar protein 5A	GN=Nol5a	A2APD6_MOUSE	16	8	24	1
Nucleolar protein family A	GN=Nhp2	A2AA61_MOUSE	3	1	4	1.58496
Nucleolar RNA helicase 2	GN=Ddx21	DDX21_MOUSE	17	1	18	4.08746
Nucleophosmin	GN=Npm1	NPM_MOUSE	12	17	29	-0.5025
Nucleoporin 153 AC=Q80WR0 OS=Mus musculus (Mouse).	GN=Nup153	Q80WR0_MOUSE	8	2	10	2
Nucleoporin 160 AC=A2AH38 OS=Mus musculus (Mouse).	GN=Nup160	A2AH38_MOUSE	11	6	17	0.874469
Nucleoporin 35 AC=A2ATJ3 OS=Mus musculus (Mouse).	GN=Nup35	A2ATJ3_MOUSE	3	1	4	1.58496
Nucleoporin 50 kDa	GN=Nup50	NUP50_MOUSE	4	2	6	1
Nucleoporin NUP188 homolog AC=Q6ZQH8 OS=Mus musculus (Mouse).	GN=Nup188	NU188_MOUSE	10	3	13	1.73697
Nucleoporin Nup37 AC=Q9CWU9 OS=Mus musculus (Mouse).	GN=Nup37	NUP37_MOUSE	2	3	5	-0.584963
Nucleoporin NUP85	GN=Nup85	NUP85_MOUSE	5	8	13	-0.678072
Nucleoporin p54	GN=Nup54	NUP54_MOUSE	5	3	8	0.736966
Nucleoredoxin	GN=Nxn	NXN_MOUSE	0	3	3	N/A
Nucleoside diphosphate kinase A	GN=Nme1	NDKA_MOUSE	21	20	41	0.0703893
Nucleoside diphosphate kinase AC=B0LAA8 OS=Mus musculus (Mouse).	GN=Nme2	B0LAA8_MOUSE	26	23	49	0.176878
Nucleosome-binding protein 1	GN=Nsbp1	NSBP1_MOUSE	3	2	5	0.584963
Nucleotide exchange factor SIL1 AC=Q9EPK6 OS=Mus musculus (Mouse).	GN=Sil1	SIL1_MOUSE	1	1	2	0
Nudix (Nucleoside diphosphate linked moiety X)-type motif 2 AC=A2ANN5 OS=Mus musculus (Mouse).	GN=Nudt2	A2ANN5_MOUSE	2	1	3	1
Nudix (Nucleoside diphosphate linked moiety X)-type motif 5 AC=A2ATT6 OS=Mus musculus (Mouse).	GN=Nudt5	A2ATT6_MOUSE	3	1	4	1.58496
Obg-like ATPase 1 AC=B1AYJ8 OS=Mus musculus (Mouse).	GN=Ola1	B1AYJ8_MOUSE	14	9	23	0.63743
Olfactomedin-like protein 2B	GN=Olfml2b	OLM2B_MOUSE	7	5	12	0.485427
Opioid growth factor receptor AC=A2ACT6 OS=Mus musculus (Mouse).	GN=Ogfr	A2ACT6_MOUSE	4	1	5	2
Optic atrophy 1 homolog (Human) AC=A6H6Q3 OS=Mus musculus (Mouse).	GN=Opa1	A6H6Q3_MOUSE	12	3	15	2
Optineurin AC=A2ASP3 OS=Mus musculus (Mouse).	GN=Optn	A2ASP3_MOUSE	3	0	3	N/A
Oral-facial-digital syndrome 1 gene homolog (Human) AC=A2AEG2 OS=Mus musculus (Mouse).	GN=Ofd1	A2AEG2_MOUSE	1	1	2	0
ORF 2 protein AC=A2NWD6 OS=Mus musculus (Mouse).	GN=M6pr-ps	A2NWD6_MOUSE	4	1	5	2
Origin recognition complex subunit 2 AC=Q60862 OS=Mus musculus (Mouse).	GN=Orc2l	ORC2_MOUSE	3	1	4	1.58496
Ornithine aminotransferase	GN=Oat	OAT_MOUSE	12	4	16	1.58496
Osteoclast-stimulating factor 1	GN=Ostf1	OSTF1_MOUSE	15	23	38	-0.616671
Outer dense fiber protein 2	GN=Odf2	ODFP2_MOUSE	1	4	5	-2
Oxidation resistance protein 1	GN=Oxr1	OXR1_MOUSE	1	2	3	-1
Oxidized low-density lipoprotein receptor 1	GN=Olr1	OLR1_MOUSE	3	7	10	-1.22239
Oxysterol-binding protein 1 AC=Q3B7Z2 OS=Mus musculus (Mouse).	GN=Osbp	OSBP1_MOUSE	2	2	4	0
Oxysterol-binding protein AC=A2A716 OS=Mus musculus (Mouse).	GN=Osbpl7	A2A716_MOUSE	2	1	3	1
Oxysterol-binding protein AC=A2ABW5 OS=Mus musculus (Mouse).	GN=Osbpl2	A2ABW5_MOUSE	1	5	6	-2.32193
Oxysterol-binding protein AC=B9EJ86 OS=Mus musculus (Mouse).	GN=Osbpl8	B9EJ86_MOUSE	9	4	13	1.16993
Oxysterol-binding protein-related protein 9 AC=A2A8Z1 OS=Mus musculus (Mouse).	GN=Osbpl9	OSBL9_MOUSE	3	3	6	0
PAB-dependent poly(A)-specific ribonuclease subunit 2	GN=Pan2	PAN2_MOUSE	2	1	3	1
Pag1 protein	GN=Pag1	A6H659_MOUSE	2	4	6	-1
Paired immunoglobulin-like type 2 receptor beta 2	GN=Pilrb2	PILB2_MOUSE	3	1	4	1.58496
Palmitoyl-protein thioesterase 1	GN=Ppt1	PPT1_MOUSE	3	2	5	0.584963
Parafibromin	GN=Cdc73	CDC73_MOUSE	4	9	13	-1.16993
Paralemmin AC=Q9Z0P4 OS=Mus musculus (Mouse).	GN=Palm	PALM_MOUSE	7	6	13	0.222392
Parkinson disease (Autosomal recessive	GN=Park7	B2KFH8_MOUSE	8	14	22	-0.807355
Parkinson disease 7 domain-containing protein 1 AC=Q8BFQ8 OS=Mus musculus (Mouse).	GN=Pddc1	PDDC1_MOUSE	2	3	5	-0.584963
Paxillin AC=Q8VI36 OS=Mus musculus (Mouse).	GN=Pxn	PAXI_MOUSE	10	12	22	-0.263034
PC4 and SFRS1 interacting protein 1 AC=A2BI10 OS=Mus musculus (Mouse).	GN=Psip1	A2BI10_MOUSE	5	2	7	1.32193
Pccb protein AC=A0PJE6 OS=Mus musculus (Mouse).	GN=Pccb	A0PJE6_MOUSE	3	2	5	0.584963
PDZ and LIM domain 7	GN=Pdlim7	B8JJB6_MOUSE	2	2	4	0
PDZ and LIM domain protein 2	GN=Pdlim2	PDLI2_MOUSE	2	4	6	-1
PDZ and LIM domain protein 5	GN=Pdlim5	PDLI5_MOUSE	5	5	10	0
PDZ domain containing 8 AC=B9EJ80 OS=Mus musculus (Mouse).	GN=Pdzd8	B9EJ80_MOUSE	1	2	3	-1
PDZ domain-containing protein GIPC1	GN=Gipc1	GIPC1_MOUSE	2	1	3	1
Penta-EF hand domain containing 1 AC=A3KFW0 OS=Mus musculus (Mouse).	GN=Pef1	A3KFW0_MOUSE	3	2	5	0.584963
Peptidase (Mitochondrial processing) alpha	GN=Pmpca	A2AIW8_MOUSE	5	7	12	-0.485427
Peptidase D	GN=Pepd	A2RS23_MOUSE	3	2	5	0.584963
Peptide methionine sulfoxide reductase	GN=Msra	MSRA_MOUSE	11	14	25	-0.347923
Peptide-N(4)-(N-acetyl-beta-glucosaminyl)asparagine amidase	GN=Ngly1	NGLY1_MOUSE	2	2	4	0
Peptidoglycan recognition protein	GN=Pglyrp1	PGRP_MOUSE	33	44	77	-0.415037
Peptidyl-prolyl cis-trans isomerase AC=B9EJX8 OS=Mus musculus (Mouse).	GN=Ppil1	B9EJX8_MOUSE	3	2	5	0.584963
Peptidyl-prolyl cis-trans isomerase NIMA-interacting 4	GN=Pin4	PIN4_MOUSE	1	2	3	-1
Peptidyl-prolyl cis-trans isomerase-like 4	GN=Ppil4	PPIL4_MOUSE	3	1	4	1.58496
Peptidylprolyl isomerase domain and WD repeat-containing protein 1 AC=Q8CEC6 OS=Mus musculus (Mouse).	GN=Ppwd1	PPWD1_MOUSE	2	4	6	-1
Peptidyl-prolyl isomerase G (Cyclophilin G) AC=B2RWT5 OS=Mus musculus (Mouse).	GN=Ppig	B2RWT5_MOUSE	1	3	4	-1.58496
Peptidyl-tRNA hydrolase 2	GN=Ptrh2	PTH2_MOUSE	3	2	5	0.584963
Peroxiredoxin 1 AC=B1AXW5 OS=Mus musculus (Mouse).	GN=Prdx1	B1AXW5_MOUSE	15	14	29	0.0995357
Peroxiredoxin-2	GN=Prdx2	PRDX2_MOUSE	5	4	9	0.321928
Peroxiredoxin-5	GN=Prdx5	PRDX5_MOUSE	38	42	80	-0.14439
Peroxiredoxin-6	GN=Prdx6	PRDX6_MOUSE	30	42	72	-0.485427
Peroxisomal acyl-coenzyme A oxidase 3	GN=Acox3	ACOX3_MOUSE	5	5	10	0
Peroxisomal biogenesis factor 14	GN=Pex14	B1AS89_MOUSE	2	1	3	1
Peroxisomal biogenesis factor 19	GN=Pex19	PEX19_MOUSE	2	2	4	0
Peroxisomal carnitine O-octanoyltransferase AC=Q9DC50 OS=Mus musculus (Mouse).	GN=Crot	OCTC_MOUSE	5	4	9	0.321928
Peroxisomal multifunctional enzyme type 2	GN=Hsd17b4	DHB4_MOUSE	9	5	14	0.847997
Peroxisomal targeting signal 1 receptor	GN=Pex5	PEX5_MOUSE	3	2	5	0.584963
PEST proteolytic signal-containing nuclear protein AC=Q6P8I4 OS=Mus musculus (Mouse).	GN=Pcnp	PCNP_MOUSE	3	4	7	-0.415037
Phosducin-like protein 3	GN=Pdcl3	PDCL3_MOUSE	2	2	4	0
Phosphatase	GN=Phospho1	A2A619_MOUSE	3	0	3	N/A
Phosphate carrier protein	GN=Slc25a3	MPCP_MOUSE	10	8	18	0.321928
Phosphatidate cytidylyltransferase AC=A2AMQ4 OS=Mus musculus (Mouse).	GN=Cds2	A2AMQ4_MOUSE	2	3	5	-0.584963
Phosphatidylethanolamine-binding protein 1	GN=Pebp1	PEBP1_MOUSE	10	9	19	0.152003
Phosphatidylinositide phosphatase SAC1	GN=Sacm1l	SAC1_MOUSE	8	6	14	0.415037
Phosphatidylinositol 3 kinase	GN=Pik3r4	B2RXR2_MOUSE	2	1	3	1
Phosphatidylinositol transfer protein alpha isoform AC=P53810 OS=Mus musculus (Mouse).	GN=Pitpna	PIPNA_MOUSE	6	10	16	-0.736966
Phosphatidylinositol transfer protein beta isoform AC=P53811 OS=Mus musculus (Mouse).	GN=Pitpnb	PIPNB_MOUSE	4	2	6	1
Phosphatidylinositol-3	GN=BC067047	B2RXQ5_MOUSE	5	11	16	-1.1375
Phosphatidylinositol-4	GN=Pik3cd	PK3CD_MOUSE	2	3	5	-0.584963
Phosphatidylinositol-4	GN=Pik3cg	PK3CG_MOUSE	3	5	8	-0.736966
Phosphatidylinositol-5-phosphate 4-kinase type-2 alpha	GN=Pip4k2a	PI42A_MOUSE	3	5	8	-0.736966
Phosphatidylinositol-5-phosphate 4-kinase type-2 beta	GN=Pip4k2b	PI42B_MOUSE	3	2	5	0.584963
Phosphoacetylglucosamine mutase	GN=Pgm3	AGM1_MOUSE	3	2	5	0.584963
Phosphoenolpyruvate carboxykinase [GTP]	GN=Pck2	PCKGM_MOUSE	12	5	17	1.26303
Phosphofurin acidic cluster sorting protein 1 AC=Q8K212 OS=Mus musculus (Mouse).	GN=Pacs1	PACS1_MOUSE	1	4	5	-2
Phosphoglucomutase-2	GN=Pgm2	PGM2_MOUSE	7	4	11	0.807355
Phosphoglycolate phosphatase AC=Q8CHP8 OS=Mus musculus (Mouse).	GN=Pgp	PGP_MOUSE	7	4	11	0.807355
Phosphohistidine phosphatase 1 AC=A2AJA8 OS=Mus musculus (Mouse).	GN=Phpt1	A2AJA8_MOUSE	4	5	9	-0.321928
Phosphoinositide 3-kinase adapter protein 1	GN=Pik3ap1	BCAP_MOUSE	5	3	8	0.736966
Phosphoinositide 3-kinase p85alpha AC=P70304 OS=Mus musculus (Mouse).	GN=Pik3r1	P70304_MOUSE	7	5	12	0.485427
Phospholipase A2	GN=Plaa	A4QPD6_MOUSE	8	7	15	0.192645
Phospholipase A2	GN=Pla2g7	Q8BKM3_MOUSE	5	2	7	1.32193
Phospholipase D1	GN=Pld1	PLD1_MOUSE	2	6	8	-1.58496
Phospholipase D4	GN=Pld4	PLD4_MOUSE	7	1	8	2.80735
Phospholipid hydroperoxide glutathione peroxidase	GN=Gpx4	GPX41_MOUSE	2	3	5	-0.584963
Phospholipid scramblase 1	GN=Plscr1	PLS1_MOUSE	1	3	4	-1.58496
Phosphomannomutase 2 AC=Q9Z2M7 OS=Mus musculus (Mouse).	GN=Pmm2	PMM2_MOUSE	5	4	9	0.321928
Phosphoribosylformylglycinamidine synthase	GN=Pfas	PUR4_MOUSE	10	12	22	-0.263034
Phosphorylase b kinase regulatory subunit beta AC=Q7TSH2 OS=Mus musculus (Mouse).	GN=Phkb	KPBB_MOUSE	0	4	4	N/A
Phosphorylated CTD-interacting factor 1 AC=P59114 OS=Mus musculus (Mouse).	GN=Pcif1	PCIF1_MOUSE	3	4	7	-0.415037
Phosphoserine aminotransferase AC=Q3ULZ3 OS=Mus musculus (Mouse).	GN=Psat1	Q3ULZ3_MOUSE	8	4	12	1
Phosphoserine phosphatase	GN=Psph	SERB_MOUSE	3	2	5	0.584963
Pinin AC=O35691 OS=Mus musculus (Mouse).	GN=Pnn	PININ_MOUSE	9	5	14	0.847997
PIRA4 AC=A2NTK1 OS=Mus musculus (Mouse).	GN=Pira4	A2NTK1_MOUSE	3	7	10	-1.22239
PIRB1	GN=Lilrb3	A2NTK5_MOUSE	6	7	13	-0.222392
Plasminogen activator	GN=Plau	Q0VBA8_MOUSE	7	4	11	0.807355
Plasminogen activator inhibitor 1 RNA-binding protein	GN=Serbp1	PAIRB_MOUSE	9	9	18	0
Platelet factor 4	GN=Pf4	PLF4_MOUSE	4	0	4	N/A
Platelet glycoprotein V AC=O08742 OS=Mus musculus (Mouse).	GN=Gp5	GPV_MOUSE	4	0	4	N/A
Platelet receptor Gi24 AC=Q9D659 OS=Mus musculus (Mouse).	GN=Ghsr	GI24_MOUSE	3	1	4	1.58496
Platelet-activating factor acetylhydrolase 2	GN=Pafah2	PAFA2_MOUSE	0	4	4	N/A
Platelet-activating factor acetylhydrolase IB subunit beta	GN=Pafah1b2	PA1B2_MOUSE	1	3	4	-1.58496
Platelet-activating factor acetylhydrolase IB subunit gamma	GN=Pafah1b3	PA1B3_MOUSE	2	2	4	0
Plcb2 protein AC=B7ZNI1 OS=Mus musculus (Mouse).	GN=Plcb2	B7ZNI1_MOUSE	6	9	15	-0.584963
Pleckstrin AC=Q9JHK5 OS=Mus musculus (Mouse).	GN=Plek	PLEK_MOUSE	11	17	28	-0.628031
Pleckstrin and Sec7 domain containing 4 AC=A2AIU4 OS=Mus musculus (Mouse).	GN=Psd4	A2AIU4_MOUSE	1	4	5	-2
Pleckstrin homology domain containing family F (With FYVE domain) member 2	GN=Plekhf2	A2AIL3_MOUSE	3	1	4	1.58496
Pleckstrin homology domain-containing family A member 2	GN=Plekha2	PKHA2_MOUSE	3	2	5	0.584963
Pleckstrin homology domain-containing family O member 2	GN=Plekho2	PKHO2_MOUSE	4	4	8	0
Pleiotropic regulator 1 AC=Q922V4 OS=Mus musculus (Mouse).	GN=Plrg1	PLRG1_MOUSE	6	1	7	2.58496
Plexin-C1	GN=Plxnc1	PLXC1_MOUSE	5	2	7	1.32193
Poly(ADP-ribose) glycohydrolase 63 kDa isoform AC=A5YBK2 OS=Mus musculus (Mouse).	GN=Parg	A5YBK2_MOUSE	3	3	6	0
Poly(U)-binding-splicing factor PUF60	GN=Puf60	PUF60_MOUSE	4	6	10	-0.584963
Polyadenylate-binding protein 2	GN=Pabpn1	PABP2_MOUSE	1	2	3	-1
Polypeptide N-acetylgalactosaminyltransferase 1	GN=Galnt1	GALT1_MOUSE	5	2	7	1.32193
PRA1 family protein 3	GN=Arl6ip5	PRAF3_MOUSE	5	3	8	0.736966
Pre-B-cell leukemia transcription factor-interacting protein 1	GN=Pbxip1	PBIP1_MOUSE	7	10	17	-0.514573
Prefoldin subunit 5	GN=Pfdn5	PFD5_MOUSE	5	5	10	0
Preimplantation protein 4 AC=A2AMD5 OS=Mus musculus (Mouse).	GN=Prei4	A2AMD5_MOUSE	3	4	7	-0.415037
Pre-mRNA-processing factor 19	GN=Prpf19	PRP19_MOUSE	9	9	18	0
Pre-mRNA-processing factor 6	GN=Prpf6	PRP6_MOUSE	8	6	14	0.415037
Pre-mRNA-splicing factor 38B AC=Q80SY5 OS=Mus musculus (Mouse).	GN=Prpf38b	PR38B_MOUSE	2	3	5	-0.584963
Pre-mRNA-splicing factor RBM22	GN=Rbm22	RBM22_MOUSE	3	0	3	N/A
Pre-mRNA-splicing regulator WTAP	GN=Wtap	FL2D_MOUSE	3	0	3	N/A
Prenylcysteine oxidase AC=Q9CQF9 OS=Mus musculus (Mouse).	GN=Pcyox1	PCYOX_MOUSE	3	7	10	-1.22239
Presequence protease	GN=Pitrm1	PREP_MOUSE	7	1	8	2.80735
Probable ATP-dependent RNA helicase DDX27	GN=Ddx27	DDX27_MOUSE	2	1	3	1
Probable ATP-dependent RNA helicase DDX46	GN=Ddx46	DDX46_MOUSE	9	11	20	-0.289507
Probable ATP-dependent RNA helicase DDX56	GN=Ddx56	DDX56_MOUSE	3	0	3	N/A
Probable ATP-dependent RNA helicase DDX6	GN=Ddx6	DDX6_MOUSE	10	10	20	0
Probable cation-transporting ATPase 13A1 AC=Q9EPE9 OS=Mus musculus (Mouse).	GN=Atp13a1	AT131_MOUSE	8	5	13	0.678072
Probable E3 ubiquitin-protein ligase HERC4	GN=Herc4	HERC4_MOUSE	6	9	15	-0.584963
Probable E3 ubiquitin-protein ligase MYCBP2	GN=Mycbp2	MYCB2_MOUSE	2	5	7	-1.32193
Probable G-protein coupled receptor 84 AC=Q8CIM5 OS=Mus musculus (Mouse).	GN=Gpr84	GPR84_MOUSE	3	4	7	-0.415037
Probable G-protein coupled receptor 97 AC=Q8R0T6 OS=Mus musculus (Mouse).	GN=Gpr97	GPR97_MOUSE	6	4	10	0.584963
Probable histone acetyltransferase MYST1	GN=Myst1	MYST1_MOUSE	1	3	4	-1.58496
Probable O-sialoglycoprotein endopeptidase AC=Q8BWU5 OS=Mus musculus (Mouse).	GN=Osgep	OSGEP_MOUSE	3	3	6	0
Probable protein BRICK1 AC=Q91VR8 OS=Mus musculus (Mouse).	GN=Bri3	BRK1_MOUSE	4	3	7	0.415037
Probable transcription factor PML AC=Q60953 OS=Mus musculus (Mouse).	GN=Pml	PML_MOUSE	5	5	10	0
Probable ubiquitin carboxyl-terminal hydrolase CYLD	GN=Cyld	CYLD_MOUSE	2	2	4	0
Procollagen-lysine	GN=Plod1	A2A7Z0_MOUSE	4	3	7	0.415037
Procollagen-lysine	GN=Plod3	PLOD3_MOUSE	1	2	3	-1
Profilin AC=Q3U7V7 OS=Mus musculus (Mouse).	GN=Pfn1	Q3U7V7_MOUSE	138	122	260	0.177787
Profilin-1	GN=Pfn1	PROF1_MOUSE	152	148	300	0.0384741
Programmed cell death protein 10	GN=Pdcd10	PDC10_MOUSE	3	5	8	-0.736966
Programmed cell death protein 5	GN=Pdcd5	PDCD5_MOUSE	1	3	4	-1.58496
Prohibitin	GN=Phb	PHB_MOUSE	15	6	21	1.32193
Prohibitin-2	GN=Phb2	PHB2_MOUSE	10	11	21	-0.137504
Prolactin regulatory element-binding protein	GN=Preb	PREB_MOUSE	1	2	3	-1
Proliferation-associated protein 2G4	GN=Pa2g4	PA2G4_MOUSE	14	12	26	0.222392
Proline-	GN=Pelp1	PELP1_MOUSE	3	2	5	0.584963
Proline synthetase co-transcribed bacterial homolog protein AC=Q9Z2Y8 OS=Mus musculus (Mouse).	GN=Prosc	PROSC_MOUSE	3	1	4	1.58496
Proline-serine-threonine phosphatase-interacting protein 1 AC=P97814 OS=Mus musculus (Mouse).	GN=Pstpip1	PPIP1_MOUSE	7	11	18	-0.652077
Proline-serine-threonine phosphatase-interacting protein 2	GN=Pstpip2	PPIP2_MOUSE	4	7	11	-0.807355
Prolow-density lipoprotein receptor-related protein 1	GN=Lrp1	LRP1_MOUSE	14	1	15	3.80735
Prominin-1	GN=Prom1	PROM1_MOUSE	0	3	3	N/A
Propionyl-CoA carboxylase alpha chain	GN=Pcca	PCCA_MOUSE	3	1	4	1.58496
Prostaglandin G/H synthase 1	GN=Ptgs1	PGH1_MOUSE	12	13	25	-0.115477
Prostaglandin reductase 2	GN=Ptgr2	PTGR2_MOUSE	3	1	4	1.58496
Proteaseome (Prosome, macropain) 28 subunit, 3	GN=Psme3	A2A4J3_MOUSE	2	3	5	-0.584963
Proteasome (Prosome, macropain) 26S subunit, non-ATPase, 13	GN=Psmd13	B2RT97_MOUSE	6	7	13	-0.222392
Proteasome (Prosome, macropain) 26S subunit, non-ATPase, 14	GN=Psmd14	A2AR77_MOUSE	3	3	6	0
Proteasome (Prosome, macropain) 26S subunit, non-ATPase, 7	GN=Psmd7	A1L3B8_MOUSE	7	9	16	-0.36257
Proteasome (Prosome, macropain) subunit beta type 6	GN=Psmb6	A2CFA7_MOUSE	1	2	3	-1
Proteasome (Prosome, macropain) subunit, beta	GN=Psmb7	A2AQL6_MOUSE	3	7	10	-1.22239
Proteasome (Prosome, macropain) subunit, beta type 2	GN=Psmb2	A2A882_MOUSE	4	5	9	-0.321928
Proteasome activator complex subunit 2	GN=Psme2	PSME2_MOUSE	13	15	28	-0.206451
Proteasome activator complex subunit 3	GN=Psme3	PSME3_MOUSE	6	6	12	0
Proteasome assembly chaperone 1	GN=Psmg1	PSMG1_MOUSE	4	1	5	2
Proteasome subunit alpha type-1	GN=Psma1	PSA1_MOUSE	15	13	28	0.206451
Proteasome subunit alpha type-2	GN=Psma2	PSA2_MOUSE	19	12	31	0.662965
Proteasome subunit alpha type-3	GN=Psma3	PSA3_MOUSE	10	12	22	-0.263034
Proteasome subunit alpha type-4	GN=Psma4	PSA4_MOUSE	13	8	21	0.70044
Proteasome subunit alpha type-5	GN=Psma5	PSA5_MOUSE	14	17	31	-0.280108
Proteasome subunit alpha type-6	GN=Psma6	PSA6_MOUSE	13	15	28	-0.206451
Proteasome subunit alpha type-7	GN=Psma7	PSA7_MOUSE	11	9	20	0.289507
Proteasome subunit beta type-1	GN=Psmb1	PSB1_MOUSE	18	24	42	-0.415037
Proteasome subunit beta type-10	GN=Psmb10	PSB10_MOUSE	6	5	11	0.263034
Proteasome subunit beta type-3	GN=Psmb3	PSB3_MOUSE	8	8	16	0
Proteasome subunit beta type-4	GN=Psmb4	PSB4_MOUSE	3	9	12	-1.58496
Proteasome subunit beta type-5	GN=Psmb5	PSB5_MOUSE	2	2	4	0
Proteasome subunit beta type-8	GN=Psmb8	PSB8_MOUSE	9	12	21	-0.415037
Proteasome subunit beta type-9	GN=Psmb9	PSB9_MOUSE	2	4	6	-1
Protein 4.1	GN=Epb41	41_MOUSE	2	1	3	1
Protein ADP-ribosylarginine hydrolase	GN=Adprh	ADPRH_MOUSE	8	10	18	-0.321928
Protein arginine N-methyltransferase 1 AC=Q9JIF0 OS=Mus musculus (Mouse).	GN=Prmt1	ANM1_MOUSE	5	7	12	-0.485427
Protein argonaute-4	GN=Eif2c4	AGO4_MOUSE	2	1	3	1
Protein ariadne-1 homolog	GN=Arih1	ARI1_MOUSE	7	3	10	1.22239
Protein canopy homolog 2	GN=Cnpy2	CNPY2_MOUSE	4	3	7	0.415037
Protein canopy homolog 4	GN=Cnpy4	CNPY4_MOUSE	4	2	6	1
Protein CASP AC=P70403 OS=Mus musculus (Mouse).	GN=Cux1	CASP_MOUSE	4	0	4	N/A
Protein CDV3	GN=Cdv3	CDV3_MOUSE	3	2	5	0.584963
Protein CREG1	GN=Creg1	CREG1_MOUSE	3	3	6	0
Protein DDI1 homolog 2 AC=A2ADY9 OS=Mus musculus (Mouse).	GN=Ddi2	DDI2_MOUSE	5	7	12	-0.485427
Protein DEK AC=Q7TNV0 OS=Mus musculus (Mouse).	GN=Dek	DEK_MOUSE	5	6	11	-0.263034
Protein diaphanous homolog 2	GN=Diaph2	DIAP2_MOUSE	5	2	7	1.32193
Protein disulfide-isomerase A5	GN=Pdia5	PDIA5_MOUSE	2	2	4	0
Protein disulfide-isomerase A6	GN=Pdia6	PDIA6_MOUSE	23	14	37	0.716207
Protein disulfide-isomerase TMX3	GN=Tmx3	TMX3_MOUSE	7	5	12	0.485427
Protein dopey-2 AC=Q3UHQ6 OS=Mus musculus (Mouse).	GN=Dopey2	DOP2_MOUSE	2	4	6	-1
Protein dpy-30 homolog	GN=Dpy30	DPY30_MOUSE	4	4	8	0
Protein ERGIC-53	GN=Lman1	LMAN1_MOUSE	6	4	10	0.584963
Protein ETHE1	GN=Ethe1	ETHE1_MOUSE	6	3	9	1
Protein EVI2B	GN=Evi2b	EVI2B_MOUSE	2	5	7	-1.32193
Protein FADD	GN=Fadd	FADD_MOUSE	3	1	4	1.58496
Protein FAM101B AC=Q5SVD0 OS=Mus musculus (Mouse).	GN=Fam101b	F101B_MOUSE	3	3	6	0
Protein FAM107B AC=Q3TGF2 OS=Mus musculus (Mouse).	GN=Fam107b	F107B_MOUSE	7	7	14	0
Protein FAM114A2 AC=Q8VE88 OS=Mus musculus (Mouse).	GN=Fam114a2	F1142_MOUSE	3	3	6	0
Protein FAM21 AC=Q6PGL7 OS=Mus musculus (Mouse).	GN=Fam21	FAM21_MOUSE	3	8	11	-1.41504
Protein FAM40A AC=Q8C079 OS=Mus musculus (Mouse).	GN=Fam40a	FA40A_MOUSE	3	4	7	-0.415037
Protein FAM63B AC=Q6PDI6 OS=Mus musculus (Mouse).	GN=Fam63b	FA63B_MOUSE	1	1	2	0
Protein FAM65B AC=Q8BJ19 OS=Mus musculus (Mouse).	GN=Fam65b	FA65B_MOUSE	10	16	26	-0.678072
Protein farnesyltransferase/geranylgeranyltransferase type-1 subunit alpha	GN=Fnta	FNTA_MOUSE	3	4	7	-0.415037
Protein FRG1	GN=Frg1	FRG1_MOUSE	2	2	4	0
Protein HIRA	GN=Hira	HIRA_MOUSE	3	0	3	N/A
Protein Hook homolog 3 AC=Q8BUK6 OS=Mus musculus (Mouse).	GN=Hook3	HOOK3_MOUSE	4	8	12	-1
Protein KIAA1967 homolog AC=Q8VDP4 OS=Mus musculus (Mouse).	GN=Kiaa1931	K1967_MOUSE	9	11	20	-0.289507
Protein kinase	GN=Prkx	B1AVU0_MOUSE	2	2	4	0
Protein kinase	GN=Prkar1a	A2AI68_MOUSE	9	5	14	0.847997
Protein kinase	GN=Prkar2b	B1B199_MOUSE	3	4	7	-0.415037
Protein kinase C and casein kinase substrate in neurons protein 2 AC=Q9WVE8 OS=Mus musculus (Mouse).	GN=Pacsin2	PACN2_MOUSE	5	6	11	-0.263034
Protein kinase C binding protein 1 AC=A2A483 OS=Mus musculus (Mouse).	GN=Prkcbp1	A2A483_MOUSE	2	1	3	1
Protein LAP4	GN=Scrib	LAP4_MOUSE	1	3	4	-1.58496
Protein LYRIC	GN=Mtdh	LYRIC_MOUSE	4	1	5	2
Protein mago nashi homolog AC=P61327 OS=Mus musculus (Mouse).	GN=Magoh	MGN_MOUSE	4	2	6	1
Protein MEMO1	GN=Memo1	MEMO1_MOUSE	2	3	5	-0.584963
Protein phosphatase 1	GN=Ppp1r12b	A6H644_MOUSE	2	0	2	N/A
Protein phosphatase 1 regulatory subunit 12A	GN=Ppp1r12a	MYPT1_MOUSE	13	11	24	0.241008
Protein phosphatase 1 regulatory subunit 3D	GN=Ppp1r3d	A2AJW4_MOUSE	5	8	13	-0.678072
Protein phosphatase 1 regulatory subunit 7	GN=Ppp1r7	PP1R7_MOUSE	10	10	20	0
Protein phosphatase 1A	GN=Ppm1a	PPM1A_MOUSE	4	4	8	0
Protein phosphatase 1B	GN=Ppm1b	PPM1B_MOUSE	2	3	5	-0.584963
Protein phosphatase 1F	GN=Ppm1f	PPM1F_MOUSE	3	2	5	0.584963
Protein phosphatase 1G	GN=Ppm1g	PPM1G_MOUSE	6	3	9	1
Protein phosphatase inhibitor 2 AC=Q9DCL8 OS=Mus musculus (Mouse).	GN=Ppp1r2	IPP2_MOUSE	1	2	3	-1
Protein polybromo-1 AC=Q8BSQ9 OS=Mus musculus (Mouse).	GN=Pbrm1	PB1_MOUSE	6	4	10	0.584963
Protein PPRC1 AC=Q3UPH1 OS=Mus musculus (Mouse).	GN=Prrc1	PRRC1_MOUSE	6	3	9	1
Protein prune homolog	GN=Prune	PRUNE_MOUSE	5	2	7	1.32193
Protein rogdi homolog	GN=Rogdi	ROGDI_MOUSE	2	1	3	1
Protein RRP5 homolog	GN=Pdcd11	RRP5_MOUSE	4	1	5	2
Protein S100-A11	GN=S100a11	S10AB_MOUSE	90	111	201	-0.302563
Protein SAAL1 AC=Q9D2C2 OS=Mus musculus (Mouse).	GN=Saal1	SAAL1_MOUSE	2	2	4	0
Protein SEC13 homolog	GN=Sec13	SEC13_MOUSE	3	2	5	0.584963
Protein SMG8	GN=Smg8	SMG8_MOUSE	2	2	4	0
Protein transport protein Sec31A	GN=Sec31a	SC31A_MOUSE	13	16	29	-0.29956
Protein TSSC4 AC=Q9JHE7 OS=Mus musculus (Mouse).	GN=Tssc4	TSSC4_MOUSE	3	3	6	0
Protein tyrosine phosphatase	GN=Ptpn12	Q80UM4_MOUSE	3	12	15	-2
Protein tyrosine phosphatase	GN=Ptpn7	B2RR29_MOUSE	3	4	7	-0.415037
Protein tyrosine phosphatase 4a2 AC=A2ACH4 OS=Mus musculus (Mouse).	GN=Ptp4a2	A2ACH4_MOUSE	1	4	5	-2
Protein tyrosine phosphatase receptor type J AC=A2AWF8 OS=Mus musculus (Mouse).	GN=Ptprj	A2AWF8_MOUSE	7	7	14	0
Protein unc-45 homolog A	GN=Unc45a	UN45A_MOUSE	4	2	6	1
Protein VAC14 homolog AC=Q80WQ2 OS=Mus musculus (Mouse).	GN=Vac14	VAC14_MOUSE	3	5	8	-0.736966
Protein virilizer homolog AC=Q9CSI3 OS=Mus musculus (Mouse).	GN=Kiaa1429	VIR_MOUSE	5	1	6	2.32193
Protein zwilch homolog AC=Q8R060 OS=Mus musculus (Mouse).	GN=Zwilch	ZWILC_MOUSE	2	4	6	-1
Protein-glutamine gamma-glutamyltransferase 2	GN=Tgm2	TGM2_MOUSE	15	0	15	N/A
Protein-glutamine gamma-glutamyltransferase K	GN=Tgm1	TGM1_MOUSE	4	3	7	0.415037
Protein-L-isoaspartate(D-aspartate) O-methyltransferase	GN=Pcmt1	PIMT_MOUSE	2	6	8	-1.58496
Protein-tyrosine phosphatase-like member B AC=Q9D3B1 OS=Mus musculus (Mouse).	GN=Ptplb	PTPLB_MOUSE	2	1	3	1
Proteolipid protein 2 AC=Q9R1Q7 OS=Mus musculus (Mouse).	GN=Plp2	PLP2_MOUSE	3	3	6	0
Prothymosin alpha	GN=Ptma	PTMA_MOUSE	2	12	14	-2.58496
Proto-oncogene tyrosine-protein kinase Fes/Fps AC=P16879 OS=Mus musculus (Mouse).	GN=Fes	FES_MOUSE	4	13	17	-1.70044
Protoporphyrinogen oxidase AC=P51175 OS=Mus musculus (Mouse).	GN=Ppox	PPOX_MOUSE	1	3	4	-1.58496
PRP4 pre-mRNA processing factor 4 homolog B (Yeast)	GN=Prpf4b	B2RUN6_MOUSE	3	2	5	0.584963
PRP40 pre-mRNA processing factor 40 homolog A (Yeast)	GN=Prpf40a	A2AQW5_MOUSE	5	4	9	0.321928
Psap protein AC=B2RUD7 OS=Mus musculus (Mouse).	GN=Psap	B2RUD7_MOUSE	10	9	19	0.152003
Psme4 protein AC=C4IXU5 OS=Mus musculus (Mouse).	GN=Psme4	C4IXU5_MOUSE	2	2	4	0
Ptms protein AC=Q66JR8 OS=Mus musculus (Mouse).	GN=Ptms	Q66JR8_MOUSE	10	9	19	0.152003
Putative Ariadne-like ubiquitin ligase PAUL AC=Q6WIZ9 OS=Mus musculus (Mouse).	GN=Rnf31	Q6WIZ9_MOUSE	3	1	4	1.58496
Putative deoxyribose-phosphate aldolase	GN=Dera	DEOC_MOUSE	4	5	9	-0.321928
Putative gag-pol protein AC=Q1W5W7 OS=Mus musculus (Mouse).	GN=ENSMUSG00000073624	Q1W5W7_MOUSE	2	1	3	1
Putative helicase MOV-10	GN=Mov10	MOV10_MOUSE	2	4	6	-1
Putative N-acetylglucosamine-6-phosphate deacetylase	GN=Amdhd2	NAGA_MOUSE	3	2	5	0.584963
Putative phospholipase B-like 2	GN=Plbd2	PLBL2_MOUSE	3	3	6	0
Putative RNA-binding protein Luc7-like 1 AC=Q9CYI4 OS=Mus musculus (Mouse).	GN=Luc7l	LUC7L_MOUSE	3	4	7	-0.415037
Putative tRNA pseudouridine synthase Pus10	GN=Pus10	PUS10_MOUSE	2	1	3	1
Putative uncharacterized protein	GN=Rhoa	Q4VAE6_MOUSE	24	34	58	-0.5025
Putative uncharacterized protein	GN=Rhob	Q4FJM5_MOUSE	11	21	32	-0.932886
Putative uncharacterized protein	GN=Rap1b	Q52L50_MOUSE	50	44	94	0.184425
Putative uncharacterized protein	GN=Nckap1l	Q8K1X4_MOUSE	9	22	31	-1.28951
Putative uncharacterized protein	GN=Rps3	Q5YLW3_MOUSE	18	11	29	0.710493
Putative uncharacterized protein	GN=Srm	Q543H0_MOUSE	11	11	22	0
Putative uncharacterized protein	GN=Acaa2	Q3TIT9_MOUSE	14	5	19	1.48543
Putative uncharacterized protein	GN=Sfrs7	Q3THA6_MOUSE	11	10	21	0.137504
Putative uncharacterized protein	GN=Ruvbl2	Q3TXT7_MOUSE	14	8	22	0.807355
Putative uncharacterized protein	GN=Rps4x	Q545X8_MOUSE	15	7	22	1.09954
Putative uncharacterized protein	GN=Rap2b	Q6ZWR0_MOUSE	5	2	7	1.32193
Putative uncharacterized protein	GN=Sptlc2	Q542D6_MOUSE	10	5	15	1
Putative uncharacterized protein	GN=Tes	Q3ULB1_MOUSE	10	5	15	1
Putative uncharacterized protein	GN=Rab11b	Q78ZJ8_MOUSE	18	21	39	-0.222392
Putative uncharacterized protein	GN=Rab27a	Q544U7_MOUSE	8	9	17	-0.169925
Putative uncharacterized protein	GN=Hdlbp	Q3U4Z7_MOUSE	10	7	17	0.514573
Putative uncharacterized protein	GN=Rad23b	Q3TUA4_MOUSE	8	7	15	0.192645
Putative uncharacterized protein	GN=Rbmxrt	Q91VM5_MOUSE	6	10	16	-0.736966
Putative uncharacterized protein	GN=Rpl4	Q564E8_MOUSE	13	4	17	1.70044
Putative uncharacterized protein	GN=Tia1	Q564E7_MOUSE	4	4	8	0
Putative uncharacterized protein	GN=Srpk1	Q3UB06_MOUSE	2	3	5	-0.584963
Putative uncharacterized protein	GN=Akt1	Q6GSA6_MOUSE	3	4	7	-0.415037
Putative uncharacterized protein	GN=Rps15a	Q5M9M4_MOUSE	16	12	28	0.415037
Putative uncharacterized protein	GN=Rps18	Q561N5_MOUSE	9	7	16	0.36257
Putative uncharacterized protein	GN=Vps4b	Q3TN07_MOUSE	4	9	13	-1.16993
Putative uncharacterized protein	GN=Ugdh	Q3TS38_MOUSE	5	8	13	-0.678072
Putative uncharacterized protein	GN=Stx11	Q3TAS3_MOUSE	3	9	12	-1.58496
Putative uncharacterized protein	GN=Stfa2l1	Q8BWM3_MOUSE	99	13	112	2.92892
Putative uncharacterized protein	GN=Rab6	Q3U4W5_MOUSE	6	5	11	0.263034
Putative uncharacterized protein	GN=Xpnpep1	Q3UE92_MOUSE	8	3	11	1.41504
Putative uncharacterized protein	GN=Tbc1d1	Q3U3T9_MOUSE	5	5	10	0
Putative uncharacterized protein	GN=Rab4b	Q4V9W8_MOUSE	5	4	9	0.321928
Putative uncharacterized protein	GN=Rpl9	Q5EBQ6_MOUSE	10	6	16	0.736966
Putative uncharacterized protein	GN=Uqcrb	Q9CQB4_MOUSE	10	4	14	1.32193
Putative uncharacterized protein	GN=1810074P20Rik	A2RSP7_MOUSE	6	5	11	0.263034
Putative uncharacterized protein	GN=Smarcb1	Q3UDA4_MOUSE	7	4	11	0.807355
Putative uncharacterized protein	GN=Upp1	Q5SUC8_MOUSE	2	7	9	-1.80735
Putative uncharacterized protein	GN=Tsn	Q545E6_MOUSE	6	4	10	0.584963
Putative uncharacterized protein	GN=Rfc3	Q3TKD1_MOUSE	5	3	8	0.736966
Putative uncharacterized protein	GN=Uba5	Q3TG27_MOUSE	3	5	8	-0.736966
Putative uncharacterized protein	GN=Stx7	Q8BH40_MOUSE	5	2	7	1.32193
Putative uncharacterized protein	GN=S100a8	Q53X15_MOUSE	471	589	1060	-0.322541
Putative uncharacterized protein	GN=Rbm3	Q545K5_MOUSE	12	10	22	0.263034
Putative uncharacterized protein	GN=Btf3	Q3UJR8_MOUSE	11	8	19	0.459432
Putative uncharacterized protein	GN=Rps17	Q5M9L7_MOUSE	6	9	15	-0.584963
Putative uncharacterized protein	GN=Snx3	Q78ZM0_MOUSE	7	4	11	0.807355
Putative uncharacterized protein	GN=Rab31	Q3TXV4_MOUSE	3	3	6	0
Putative uncharacterized protein	GN=Rps11	Q3UC02_MOUSE	7	1	8	2.80735
Putative uncharacterized protein	GN=Gtf2f2	Q3UMJ4_MOUSE	5	3	8	0.736966
Putative uncharacterized protein	GN=Stat6	Q8R2F1_MOUSE	3	5	8	-0.736966
Putative uncharacterized protein	GN=Psmd9	Q3THC1_MOUSE	2	4	6	-1
Putative uncharacterized protein	GN=Tfrc	Q542D9_MOUSE	4	3	7	0.415037
Putative uncharacterized protein	GN=Vps36	Q3TSR1_MOUSE	2	4	6	-1
Putative uncharacterized protein	GN=Tbca	Q5I0U7_MOUSE	3	3	6	0
Putative uncharacterized protein	GN=Sfrs5	Q640L9_MOUSE	5	5	10	0
Putative uncharacterized protein	GN=Tor1b	Q8VEI4_MOUSE	4	4	8	0
Putative uncharacterized protein	GN=C5ar1	Q3TZ86_MOUSE	1	6	7	-2.58496
Putative uncharacterized protein	GN=2610029G23Rik	B1AUP4_MOUSE	2	4	6	-1
Putative uncharacterized protein	GN=Sfrs4	Q542V3_MOUSE	5	1	6	2.32193
Putative uncharacterized protein	GN=Tor1a	Q3TV62_MOUSE	4	2	6	1
Putative uncharacterized protein	GN=Iigp2	Q3TAN6_MOUSE	1	1	2	0
Putative uncharacterized protein	GN=Acot2	Q3T9C9_MOUSE	3	2	5	0.584963
Putative uncharacterized protein	GN=Tbl2	Q8CFY0_MOUSE	4	1	5	2
Putative uncharacterized protein	GN=Snx12	Q3TGS7_MOUSE	2	3	5	-0.584963
Putative uncharacterized protein	GN=Surf4	Q545Q2_MOUSE	3	7	10	-1.22239
Putative uncharacterized protein	GN=Gtf2b	Q3ULN2_MOUSE	5	4	9	0.321928
Putative uncharacterized protein	GN=Rfc2	Q4KL82_MOUSE	4	3	7	0.415037
Putative uncharacterized protein	GN=Atp6v1d	Q3U861_MOUSE	3	3	6	0
Putative uncharacterized protein	GN=Ard1a	Q3V4D5_MOUSE	4	2	6	1
Putative uncharacterized protein	GN=Rps13	Q5BLJ7_MOUSE	4	1	5	2
Putative uncharacterized protein	GN=Sgta	Q3TN35_MOUSE	4	0	4	N/A
Putative uncharacterized protein	GN=Stam	Q3TQ49_MOUSE	1	1	2	0
Putative uncharacterized protein	GN=Vamp4	Q8BSN6_MOUSE	2	2	4	0
Putative uncharacterized protein	GN=Rpl27a	Q9CQ16_MOUSE	5	3	8	0.736966
Putative uncharacterized protein	GN=Ssr4	Q3TVJ8_MOUSE	6	1	7	2.58496
Putative uncharacterized protein	GN=Rpl35a	Q6ZWX1_MOUSE	4	3	7	0.415037
Putative uncharacterized protein	GN=Ttr	Q5M9K1_MOUSE	3	2	5	0.584963
Putative uncharacterized protein	GN=Tgfb1	Q3UNK5_MOUSE	4	1	5	2
Putative uncharacterized protein	GN=Scamp2	Q3TAL2_MOUSE	1	4	5	-2
Putative uncharacterized protein	GN=Spcs3	Q6ZWQ7_MOUSE	2	2	4	0
Putative uncharacterized protein	GN=Wdr36	Q3TA68_MOUSE	3	1	4	1.58496
Putative uncharacterized protein	GN=Rps25	Q58EA6_MOUSE	2	2	4	0
Putative uncharacterized protein	GN=Tfip11	Q3TTV6_MOUSE	3	1	4	1.58496
Putative uncharacterized protein	GN=Rps26	Q497N1_MOUSE	2	2	4	0
Putative uncharacterized protein	GN=Polr2e	Q3V214_MOUSE	2	2	4	0
Putative uncharacterized protein	GN=Rnaset2	Q5FWA0_MOUSE	2	1	3	1
Putative uncharacterized protein	GN=Dtx3l	Q3UIR3_MOUSE	1	2	3	-1
Putative uncharacterized protein	GN=Sfrs6	Q3TWW8_MOUSE	2	1	3	1
Putative uncharacterized protein	GN=Tst	Q545S0_MOUSE	0	3	3	N/A
Putative uncharacterized protein	GN=Sec11c	Q8BM48_MOUSE	4	3	7	0.415037
Putative uncharacterized protein	GN=Sfpi1	Q3U5L4_MOUSE	4	3	7	0.415037
Putative uncharacterized protein	GN=Fcgr4	Q3TC44_MOUSE	2	2	4	0
Putative uncharacterized protein	GN=Scamp1	Q3TD71_MOUSE	2	2	4	0
Putative uncharacterized protein AC=A8C1V1 OS=Mus musculus (Mouse).	GN=Armet	A8C1V1_MOUSE	5	4	9	0.321928
Putative uncharacterized protein AC=B9EJS1 OS=Mus musculus (Mouse).	GN=D030016E14Rik	B9EJS1_MOUSE	3	3	6	0
Putative uncharacterized protein AC=Q3T992 OS=Mus musculus (Mouse).	GN=Ubqln1	Q3T992_MOUSE	5	5	10	0
Putative uncharacterized protein AC=Q3T9E5 OS=Mus musculus (Mouse).	GN=Ncstn	Q3T9E5_MOUSE	4	6	10	-0.584963
Putative uncharacterized protein AC=Q3TAF0 OS=Mus musculus (Mouse).	GN=Eefsec	Q3TAF0_MOUSE	4	1	5	2
Putative uncharacterized protein AC=Q3TAR6 OS=Mus musculus (Mouse).	GN=Vrk3	Q3TAR6_MOUSE	3	3	6	0
Putative uncharacterized protein AC=Q3TBL4 OS=Mus musculus (Mouse).	GN=Rbbp5	Q3TBL4_MOUSE	0	3	3	N/A
Putative uncharacterized protein AC=Q3TBQ3 OS=Mus musculus (Mouse).	GN=Man2c1	Q3TBQ3_MOUSE	2	1	3	1
Putative uncharacterized protein AC=Q3TC98 OS=Mus musculus (Mouse).	GN=Vps39	Q3TC98_MOUSE	2	2	4	0
Putative uncharacterized protein AC=Q3TD51 OS=Mus musculus (Mouse).	GN=Picalm	Q3TD51_MOUSE	14	15	29	-0.0995357
Putative uncharacterized protein AC=Q3TDM8 OS=Mus musculus (Mouse).	GN=Scamp3	Q3TDM8_MOUSE	4	2	6	1
Putative uncharacterized protein AC=Q3TDS9 OS=Mus musculus (Mouse).	GN=Rpl13a	Q3TDS9_MOUSE	2	3	5	-0.584963
Putative uncharacterized protein AC=Q3TDX2 OS=Mus musculus (Mouse).	GN=Vps4a	Q3TDX2_MOUSE	2	2	4	0
Putative uncharacterized protein AC=Q3TDY6 OS=Mus musculus (Mouse).	GN=Tpp1	Q3TDY6_MOUSE	3	1	4	1.58496
Putative uncharacterized protein AC=Q3TEE8 OS=Mus musculus (Mouse).	GN=Txndc5	Q3TEE8_MOUSE	7	0	7	N/A
Putative uncharacterized protein AC=Q3TEK9 OS=Mus musculus (Mouse).	GN=Srpk2	Q3TEK9_MOUSE	2	2	4	0
Putative uncharacterized protein AC=Q3TF18 OS=Mus musculus (Mouse).	GN=Parp1	Q3TF18_MOUSE	10	4	14	1.32193
Putative uncharacterized protein AC=Q3TF81 OS=Mus musculus (Mouse).	GN=Rpp30	Q3TF81_MOUSE	2	1	3	1
Putative uncharacterized protein AC=Q3TF87 OS=Mus musculus (Mouse).	GN=Dars	Q3TF87_MOUSE	15	8	23	0.906891
Putative uncharacterized protein AC=Q3TFA9 OS=Mus musculus (Mouse).	GN=Tmod3	Q3TFA9_MOUSE	20	23	43	-0.201634
Putative uncharacterized protein AC=Q3TFF0 OS=Mus musculus (Mouse).	GN=Dnaja2	Q3TFF0_MOUSE	4	3	7	0.415037
Putative uncharacterized protein AC=Q3TFU8 OS=Mus musculus (Mouse).	GN=Tmed9	Q3TFU8_MOUSE	9	3	12	1.58496
Putative uncharacterized protein AC=Q3TG12 OS=Mus musculus (Mouse).	GN=Farsb	Q3TG12_MOUSE	10	9	19	0.152003
Putative uncharacterized protein AC=Q3TG21 OS=Mus musculus (Mouse).	GN=Atp6v1c1	Q3TG21_MOUSE	6	8	14	-0.415037
Putative uncharacterized protein AC=Q3TGI0 OS=Mus musculus (Mouse).	GN=Xrcc1	Q3TGI0_MOUSE	3	2	5	0.584963
Putative uncharacterized protein AC=Q3THJ0 OS=Mus musculus (Mouse).	GN=Rpl18a	Q3THJ0_MOUSE	6	5	11	0.263034
Putative uncharacterized protein AC=Q3THJ6 OS=Mus musculus (Mouse).	GN=Rpl10	Q3THJ6_MOUSE	6	1	7	2.58496
Putative uncharacterized protein AC=Q3THX5 OS=Mus musculus (Mouse).	GN=Mvp	Q3THX5_MOUSE	18	7	25	1.36257
Putative uncharacterized protein AC=Q3THZ3 OS=Mus musculus (Mouse).	GN=Atp6ap1	Q3THZ3_MOUSE	2	3	5	-0.584963
Putative uncharacterized protein AC=Q3TIQ2 OS=Mus musculus (Mouse).	GN=Rpl12	Q3TIQ2_MOUSE	12	7	19	0.777608
Putative uncharacterized protein AC=Q3TIV0 OS=Mus musculus (Mouse).	GN=Hmbs	Q3TIV0_MOUSE	6	5	11	0.263034
Putative uncharacterized protein AC=Q3TIV2 OS=Mus musculus (Mouse).	GN=Zc3h11a	Q3TIV2_MOUSE	4	3	7	0.415037
Putative uncharacterized protein AC=Q3TJ55 OS=Mus musculus (Mouse).	GN=Stx2	Q3TJ55_MOUSE	1	2	3	-1
Putative uncharacterized protein AC=Q3TJB4 OS=Mus musculus (Mouse).	GN=Sh3gl1	Q3TJB4_MOUSE	5	2	7	1.32193
Putative uncharacterized protein AC=Q3TJD0 OS=Mus musculus (Mouse).	GN=Sec61a1	Q3TJD0_MOUSE	3	3	6	0
Putative uncharacterized protein AC=Q3TKD0 OS=Mus musculus (Mouse).	GN=Tnpo1	Q3TKD0_MOUSE	11	8	19	0.459432
Putative uncharacterized protein AC=Q3TKH5 OS=Mus musculus (Mouse).	GN=Zcchc8	Q3TKH5_MOUSE	5	10	15	-1
Putative uncharacterized protein AC=Q3TKU3 OS=Mus musculus (Mouse).	GN=Hars	Q3TKU3_MOUSE	7	9	16	-0.36257
Putative uncharacterized protein AC=Q3TL33 OS=Mus musculus (Mouse).	GN=Calu	Q3TL33_MOUSE	8	7	15	0.192645
Putative uncharacterized protein AC=Q3TL56 OS=Mus musculus (Mouse).	GN=Vrk1	Q3TL56_MOUSE	5	9	14	-0.847997
Putative uncharacterized protein AC=Q3TL58 OS=Mus musculus (Mouse).	GN=Skp1a	Q3TL58_MOUSE	6	7	13	-0.222392
Putative uncharacterized protein AC=Q3TMB8 OS=Mus musculus (Mouse).	GN=Adsl	Q3TMB8_MOUSE	10	8	18	0.321928
Putative uncharacterized protein AC=Q3TN42 OS=Mus musculus (Mouse).	GN=Utp15	Q3TN42_MOUSE	3	0	3	N/A
Putative uncharacterized protein AC=Q3TN94 OS=Mus musculus (Mouse).	GN=Qars	Q3TN94_MOUSE	9	8	17	0.169925
Putative uncharacterized protein AC=Q3TNE1 OS=Mus musculus (Mouse).	GN=Heatr1	Q3TNE1_MOUSE	3	0	3	N/A
Putative uncharacterized protein AC=Q3TPB6 OS=Mus musculus (Mouse).	GN=Rab3gap1	Q3TPB6_MOUSE	4	1	5	2
Putative uncharacterized protein AC=Q3TPK8 OS=Mus musculus (Mouse).	GN=Rbms1	Q3TPK8_MOUSE	2	4	6	-1
Putative uncharacterized protein AC=Q3TPS9 OS=Mus musculus (Mouse).	GN=Rap1gds1	Q3TPS9_MOUSE	6	12	18	-1
Putative uncharacterized protein AC=Q3TQ27 OS=Mus musculus (Mouse).	GN=Ube2a	Q3TQ27_MOUSE	0	2	2	N/A
Putative uncharacterized protein AC=Q3TQP7 OS=Mus musculus (Mouse).	GN=Acat1	Q3TQP7_MOUSE	13	6	19	1.11548
Putative uncharacterized protein AC=Q3TR16 OS=Mus musculus (Mouse).	GN=Sfrs11	Q3TR16_MOUSE	2	3	5	-0.584963
Putative uncharacterized protein AC=Q3TSX8 OS=Mus musculus (Mouse).	GN=Tomm70a	Q3TSX8_MOUSE	7	7	14	0
Putative uncharacterized protein AC=Q3TT02 OS=Mus musculus (Mouse).	GN=Snx8	Q3TT02_MOUSE	3	0	3	N/A
Putative uncharacterized protein AC=Q3TV94 OS=Mus musculus (Mouse).	GN=Ssr1	Q3TV94_MOUSE	5	2	7	1.32193
Putative uncharacterized protein AC=Q3TV96 OS=Mus musculus (Mouse).	GN=Unc84a	Q3TV96_MOUSE	2	2	4	0
Putative uncharacterized protein AC=Q3TVX7 OS=Mus musculus (Mouse).	GN=Sypl	Q3TVX7_MOUSE	3	2	5	0.584963
Putative uncharacterized protein AC=Q3TVY6 OS=Mus musculus (Mouse).	GN=Atp2c1	Q3TVY6_MOUSE	4	1	5	2
Putative uncharacterized protein AC=Q3TW11 OS=Mus musculus (Mouse).	GN=Stat1	Q3TW11_MOUSE	12	14	26	-0.222392
Putative uncharacterized protein AC=Q3TW28 OS=Mus musculus (Mouse).	GN=Tpp2	Q3TW28_MOUSE	10	12	22	-0.263034
Putative uncharacterized protein AC=Q3TWB8 OS=Mus musculus (Mouse).	GN=Tm9sf2	Q3TWB8_MOUSE	8	5	13	0.678072
Putative uncharacterized protein AC=Q3TXD3 OS=Mus musculus (Mouse).	GN=Vat1	Q3TXD3_MOUSE	11	12	23	-0.125531
Putative uncharacterized protein AC=Q3TXK6 OS=Mus musculus (Mouse).	GN=Tsnax	Q3TXK6_MOUSE	4	3	7	0.415037
Putative uncharacterized protein AC=Q3U057 OS=Mus musculus (Mouse).	GN=Cpsf3	Q3U057_MOUSE	7	2	9	1.80735
Putative uncharacterized protein AC=Q3U0F9 OS=Mus musculus (Mouse).	GN=Ifi30	Q3U0F9_MOUSE	4	0	4	N/A
Putative uncharacterized protein AC=Q3U146 OS=Mus musculus (Mouse).	GN=Sipa1	Q3U146_MOUSE	8	8	16	0
Putative uncharacterized protein AC=Q3U172 OS=Mus musculus (Mouse).	GN=Arrb1	Q3U172_MOUSE	1	1	2	0
Putative uncharacterized protein AC=Q3U1H7 OS=Mus musculus (Mouse).	GN=Snx18	Q3U1H7_MOUSE	2	3	5	-0.584963
Putative uncharacterized protein AC=Q3U1L8 OS=Mus musculus (Mouse).	GN=Sidt2	Q3U1L8_MOUSE	1	2	3	-1
Putative uncharacterized protein AC=Q3U1S0 OS=Mus musculus (Mouse).	GN=Tnpo2	Q3U1S0_MOUSE	2	2	4	0
Putative uncharacterized protein AC=Q3U224 OS=Mus musculus (Mouse).	GN=C130039O16Rik	Q3U224_MOUSE	1	3	4	-1.58496
Putative uncharacterized protein AC=Q3U2D1 OS=Mus musculus (Mouse).	GN=Plaur	Q3U2D1_MOUSE	2	5	7	-1.32193
Putative uncharacterized protein AC=Q3U390 OS=Mus musculus (Mouse).	GN=Sirpb1	Q3U390_MOUSE	3	2	5	0.584963
Putative uncharacterized protein AC=Q3U3L3 OS=Mus musculus (Mouse).	GN=Serpinb6a	Q3U3L3_MOUSE	11	2	13	2.45943
Putative uncharacterized protein AC=Q3U3Q8 OS=Mus musculus (Mouse).	GN=Rela	Q3U3Q8_MOUSE	4	5	9	-0.321928
Putative uncharacterized protein AC=Q3U3S0 OS=Mus musculus (Mouse).	GN=Strn4	Q3U3S0_MOUSE	3	3	6	0
Putative uncharacterized protein AC=Q3U3Z9 OS=Mus musculus (Mouse).	GN=Ripk3	Q3U3Z9_MOUSE	4	2	6	1
Putative uncharacterized protein AC=Q3U405 OS=Mus musculus (Mouse).	GN=Rasa2	Q3U405_MOUSE	1	2	3	-1
Putative uncharacterized protein AC=Q3U473 OS=Mus musculus (Mouse).	GN=ORF19	Q3U473_MOUSE	1	3	4	-1.58496
Putative uncharacterized protein AC=Q3U4F0 OS=Mus musculus (Mouse).	GN=Sfxn3	Q3U4F0_MOUSE	3	0	3	N/A
Putative uncharacterized protein AC=Q3U4M0 OS=Mus musculus (Mouse).	GN=Tsc22d4	Q3U4M0_MOUSE	4	3	7	0.415037
Putative uncharacterized protein AC=Q3U543 OS=Mus musculus (Mouse).	GN=Tap1	Q3U543_MOUSE	8	5	13	0.678072
Putative uncharacterized protein AC=Q3U548 OS=Mus musculus (Mouse).	GN=Ugp2	Q3U548_MOUSE	10	10	20	0
Putative uncharacterized protein AC=Q3U591 OS=Mus musculus (Mouse).	GN=Tardbp	Q3U591_MOUSE	8	12	20	-0.584963
Putative uncharacterized protein AC=Q3U5P8 OS=Mus musculus (Mouse).	GN=Rps3a	Q3U5P8_MOUSE	11	10	21	0.137504
Putative uncharacterized protein AC=Q3U5R8 OS=Mus musculus (Mouse).	GN=Impa1	Q3U5R8_MOUSE	3	9	12	-1.58496
Putative uncharacterized protein AC=Q3U5W1 OS=Mus musculus (Mouse).	GN=Stat2	Q3U5W1_MOUSE	2	3	5	-0.584963
Putative uncharacterized protein AC=Q3U687 OS=Mus musculus (Mouse).	GN=2010002M12Rik	Q3U687_MOUSE	4	2	6	1
Putative uncharacterized protein AC=Q3U6A2 OS=Mus musculus (Mouse).	GN=Rbm14	Q3U6A2_MOUSE	4	1	5	2
Putative uncharacterized protein AC=Q3U6C7 OS=Mus musculus (Mouse).	GN=Sucla2	Q3U6C7_MOUSE	5	3	8	0.736966
Putative uncharacterized protein AC=Q3U6Q1 OS=Mus musculus (Mouse).	GN=Wbp11	Q3U6Q1_MOUSE	4	1	5	2
Putative uncharacterized protein AC=Q3U6U7 OS=Mus musculus (Mouse).	GN=Wars	Q3U6U7_MOUSE	6	5	11	0.263034
Putative uncharacterized protein AC=Q3U6W2 OS=Mus musculus (Mouse).	GN=Nolc1	Q3U6W2_MOUSE	5	0	5	N/A
Putative uncharacterized protein AC=Q3U850 OS=Mus musculus (Mouse).	GN=Rpl5	Q3U850_MOUSE	12	7	19	0.777608
Putative uncharacterized protein AC=Q3U876 OS=Mus musculus (Mouse).	GN=Sp100	Q3U876_MOUSE	10	9	19	0.152003
Putative uncharacterized protein AC=Q3U8B3 OS=Mus musculus (Mouse).	GN=Rpa1	Q3U8B3_MOUSE	5	3	8	0.736966
Putative uncharacterized protein AC=Q3U8F5 OS=Mus musculus (Mouse).	GN=Psmd12	Q3U8F5_MOUSE	8	9	17	-0.169925
Putative uncharacterized protein AC=Q3U8R9 OS=Mus musculus (Mouse).	GN=Txnl1	Q3U8R9_MOUSE	5	8	13	-0.678072
Putative uncharacterized protein AC=Q3U907 OS=Mus musculus (Mouse).	GN=Sgk3	Q3U907_MOUSE	2	3	5	-0.584963
Putative uncharacterized protein AC=Q3U912 OS=Mus musculus (Mouse).	GN=Sphk2	Q3U912_MOUSE	1	5	6	-2.32193
Putative uncharacterized protein AC=Q3U9D7 OS=Mus musculus (Mouse).	GN=Uhrf1	Q3U9D7_MOUSE	5	0	5	N/A
Putative uncharacterized protein AC=Q3U9P0 OS=Mus musculus (Mouse).	GN=Rps10	Q3U9P0_MOUSE	12	6	18	1
Putative uncharacterized protein AC=Q3U9P7 OS=Mus musculus (Mouse).	GN=Oxct1	Q3U9P7_MOUSE	18	4	22	2.16993
Putative uncharacterized protein AC=Q3UAI4 OS=Mus musculus (Mouse).	GN=Sf3b2	Q3UAI4_MOUSE	9	6	15	0.584963
Putative uncharacterized protein AC=Q3UB15 OS=Mus musculus (Mouse).	GN=Rpl3	Q3UB15_MOUSE	11	10	21	0.137504
Putative uncharacterized protein AC=Q3UBI6 OS=Mus musculus (Mouse).	GN=Rpl7	Q3UBI6_MOUSE	8	8	16	0
Putative uncharacterized protein AC=Q3UCX0 OS=Mus musculus (Mouse).	GN=Nras	Q3UCX0_MOUSE	3	6	9	-1
Putative uncharacterized protein AC=Q3UDC3 OS=Mus musculus (Mouse).	GN=Tom1	Q3UDC3_MOUSE	7	12	19	-0.777608
Putative uncharacterized protein AC=Q3UDH4 OS=Mus musculus (Mouse).	GN=Sec24b	Q3UDH4_MOUSE	1	4	5	-2
Putative uncharacterized protein AC=Q3UDJ2 OS=Mus musculus (Mouse).	GN=Sgpl1	Q3UDJ2_MOUSE	7	6	13	0.222392
Putative uncharacterized protein AC=Q3UDK3 OS=Mus musculus (Mouse).	GN=Rfc5	Q3UDK3_MOUSE	1	3	4	-1.58496
Putative uncharacterized protein AC=Q3UFM4 OS=Mus musculus (Mouse).	GN=Man1a	Q3UFM4_MOUSE	3	1	4	1.58496
Putative uncharacterized protein AC=Q3UH32 OS=Mus musculus (Mouse).	GN=Trrap	Q3UH32_MOUSE	7	7	14	0
Putative uncharacterized protein AC=Q3UI14 OS=Mus musculus (Mouse).	GN=Jmjd1b	Q3UI14_MOUSE	1	1	2	0
Putative uncharacterized protein AC=Q3UI45 OS=Mus musculus (Mouse).	GN=Sf1	Q3UI45_MOUSE	7	7	14	0
Putative uncharacterized protein AC=Q3UJ04 OS=Mus musculus (Mouse).	GN=Rsf1	Q3UJ04_MOUSE	3	2	5	0.584963
Putative uncharacterized protein AC=Q3UJ44 OS=Mus musculus (Mouse).	GN=Capg	Q3UJ44_MOUSE	19	19	38	0
Putative uncharacterized protein AC=Q3UJK6 OS=Mus musculus (Mouse).	GN=Sirt2	Q3UJK6_MOUSE	2	3	5	-0.584963
Putative uncharacterized protein AC=Q3UJS0 OS=Mus musculus (Mouse).	GN=Rpl8	Q3UJS0_MOUSE	5	1	6	2.32193
Putative uncharacterized protein AC=Q3UK24 OS=Mus musculus (Mouse).	GN=Wdr37	Q3UK24_MOUSE	1	4	5	-2
Putative uncharacterized protein AC=Q3UKP5 OS=Mus musculus (Mouse).	GN=Xab2	Q3UKP5_MOUSE	6	0	6	N/A
Putative uncharacterized protein AC=Q3UL40 OS=Mus musculus (Mouse).	GN=Tacc2	Q3UL40_MOUSE	1	1	2	0
Putative uncharacterized protein AC=Q3ULG4 OS=Mus musculus (Mouse).	GN=Psmd4	Q3ULG4_MOUSE	6	4	10	0.584963
Putative uncharacterized protein AC=Q3ULL9 OS=Mus musculus (Mouse).	GN=Acad9	Q3ULL9_MOUSE	5	3	8	0.736966
Putative uncharacterized protein AC=Q3ULW0 OS=Mus musculus (Mouse).	GN=Ran	Q3ULW0_MOUSE	12	15	27	-0.321928
Putative uncharacterized protein AC=Q3ULW3 OS=Mus musculus (Mouse).	GN=E330016A19Rik	Q3ULW3_MOUSE	2	3	5	-0.584963
Putative uncharacterized protein AC=Q3UMP2 OS=Mus musculus (Mouse).	GN=Hmgcl	Q3UMP2_MOUSE	13	9	22	0.530515
Putative uncharacterized protein AC=Q3UPG0 OS=Mus musculus (Mouse).	GN=Ap3b1	Q3UPG0_MOUSE	5	9	14	-0.847997
Putative uncharacterized protein AC=Q3UPG6 OS=Mus musculus (Mouse).	GN=Clint1	Q3UPG6_MOUSE	12	12	24	0
Putative uncharacterized protein AC=Q3UQD0 OS=Mus musculus (Mouse).	GN=Tomm40	Q3UQD0_MOUSE	2	2	4	0
Putative uncharacterized protein AC=Q3URY9 OS=Mus musculus (Mouse).	GN=Rb1	Q3URY9_MOUSE	1	2	3	-1
Putative uncharacterized protein AC=Q3UT39 OS=Mus musculus (Mouse).	GN=Arid1b	Q3UT39_MOUSE	3	0	3	N/A
Putative uncharacterized protein AC=Q3UUN5 OS=Mus musculus (Mouse).	GN=Pten	Q3UUN5_MOUSE	2	3	5	-0.584963
Putative uncharacterized protein AC=Q3UW66 OS=Mus musculus (Mouse).	GN=Mpst	Q3UW66_MOUSE	8	6	14	0.415037
Putative uncharacterized protein AC=Q3UWX7 OS=Mus musculus (Mouse).	GN=Tcea1	Q3UWX7_MOUSE	4	6	10	-0.584963
Putative uncharacterized protein AC=Q3UZK5 OS=Mus musculus (Mouse).	GN=Akap13	Q3UZK5_MOUSE	11	8	19	0.459432
Putative uncharacterized protein AC=Q3V090 OS=Mus musculus (Mouse).	GN=Rasa1	Q3V090_MOUSE	3	0	3	N/A
Putative uncharacterized protein AC=Q3V3V7 OS=Mus musculus (Mouse).	GN=Zcchc6	Q3V3V7_MOUSE	0	4	4	N/A
Putative uncharacterized protein AC=Q542X6 OS=Mus musculus (Mouse).	GN=Srprb	Q542X6_MOUSE	7	3	10	1.22239
Putative uncharacterized protein AC=Q6ZWN0 OS=Mus musculus (Mouse).	GN=Syne2	Q6ZWN0_MOUSE	3	2	5	0.584963
Putative uncharacterized protein AC=Q8BIV6 OS=Mus musculus (Mouse).	GN=2310005E10Rik	Q8BIV6_MOUSE	2	2	4	0
Putative uncharacterized protein AC=Q8BJI6 OS=Mus musculus (Mouse).	GN=D030074E01Rik	Q8BJI6_MOUSE	4	4	8	0
Putative uncharacterized protein AC=Q8BMZ7 OS=Mus musculus (Mouse).	GN=Vps28	Q8BMZ7_MOUSE	4	6	10	-0.584963
Putative uncharacterized protein AC=Q8BNL1 OS=Mus musculus (Mouse).	GN=Dnajc13	Q8BNL1_MOUSE	7	12	19	-0.777608
Putative uncharacterized protein AC=Q8BPH0 OS=Mus musculus (Mouse).	GN=Gspt1	Q8BPH0_MOUSE	7	3	10	1.22239
Putative uncharacterized protein AC=Q8BRQ9 OS=Mus musculus (Mouse).	GN=Sfxn5	Q8BRQ9_MOUSE	2	1	3	1
Putative uncharacterized protein AC=Q8BSE7 OS=Mus musculus (Mouse).	GN=Clasp2	Q8BSE7_MOUSE	2	1	3	1
Putative uncharacterized protein AC=Q8BTN4 OS=Mus musculus (Mouse).	GN=Uba7	Q8BTN4_MOUSE	3	11	14	-1.87447
Putative uncharacterized protein AC=Q8BVK3 OS=Mus musculus (Mouse).	GN=Uap1l1	Q8BVK3_MOUSE	9	14	23	-0.63743
Putative uncharacterized protein AC=Q8BZY3 OS=Mus musculus (Mouse).	GN=Ddx19b	Q8BZY3_MOUSE	5	4	9	0.321928
Putative uncharacterized protein AC=Q8C178 OS=Mus musculus (Mouse).	GN=Acox3	Q8C178_MOUSE	5	5	10	0
Putative uncharacterized protein AC=Q8C1T5 OS=Mus musculus (Mouse).	GN=Napg	Q8C1T5_MOUSE	3	2	5	0.584963
Putative uncharacterized protein AC=Q8C295 OS=Mus musculus (Mouse).	GN=Sptlc1	Q8C295_MOUSE	4	3	7	0.415037
Putative uncharacterized protein AC=Q8C2D2 OS=Mus musculus (Mouse).	GN=Ufd1l	Q8C2D2_MOUSE	3	2	5	0.584963
Putative uncharacterized protein AC=Q8C2D8 OS=Mus musculus (Mouse).	GN=Ly6c1	Q8C2D8_MOUSE	9	21	30	-1.22239
Putative uncharacterized protein AC=Q8C4E7 OS=Mus musculus (Mouse).	GN=A930041I02Rik	Q8C4E7_MOUSE	2	2	4	0
Putative uncharacterized protein AC=Q8C5X6 OS=Mus musculus (Mouse).	GN=Fen1	Q8C5X6_MOUSE	4	4	8	0
Putative uncharacterized protein AC=Q8CC73 OS=Mus musculus (Mouse).	GN=9230105E10Rik	Q8CC73_MOUSE	1	3	4	-1.58496
Putative uncharacterized protein AC=Q8CDZ5 OS=Mus musculus (Mouse).	GN=Nup133	Q8CDZ5_MOUSE	11	6	17	0.874469
Putative uncharacterized protein AC=Q8CEW9 OS=Mus musculus (Mouse).	GN=Sf3b5	Q8CEW9_MOUSE	4	5	9	-0.321928
Putative uncharacterized protein AC=Q9CU36 OS=Mus musculus (Mouse).	GN=Raf1	Q9CU36_MOUSE	2	3	5	-0.584963
Putative uncharacterized protein AC=Q9CWA6 OS=Mus musculus (Mouse).	GN=4933407N01Rik	Q9CWA6_MOUSE	2	2	4	0
Putative uncharacterized protein AC=Q9CX86 OS=Mus musculus (Mouse).	GN=Hnrnpa0	Q9CX86_MOUSE	4	4	8	0
Putative uncharacterized protein AC=Q9CXX7 OS=Mus musculus (Mouse).	GN=Snrpa	Q9CXX7_MOUSE	6	1	7	2.58496
Putative uncharacterized protein AC=Q9D6F8 OS=Mus musculus (Mouse).	GN=Glrx	Q9D6F8_MOUSE	12	18	30	-0.584963
Putative uncharacterized protein AC=Q9D8L4 OS=Mus musculus (Mouse).	GN=Igh-1a	Q9D8L4_MOUSE	2	0	2	N/A
Putative uncharacterized protein AC=Q9DB22 OS=Mus musculus (Mouse).	GN=Polr2c	Q9DB22_MOUSE	1	2	3	-1
Putative uncharacterized protein AC=Q9JK28 OS=Mus musculus (Mouse).	GN=Ncapg	Q9JK28_MOUSE	2	3	5	-0.584963
Pyridoxal kinase	GN=Pdxk	PDXK_MOUSE	4	3	7	0.415037
Pyridoxine-5'-phosphate oxidase	GN=Pnpo	PNPO_MOUSE	4	2	6	1
Pyrroline-5-carboxylate reductase 1 AC=A2ABZ2 OS=Mus musculus (Mouse).	GN=Pycr1	A2ABZ2_MOUSE	2	0	2	N/A
Pyrroline-5-carboxylate reductase 2 AC=Q922Q4 OS=Mus musculus (Mouse).	GN=Pycr2	P5CR2_MOUSE	1	2	3	-1
Pyruvate dehydrogenase E1 component subunit alpha	GN=Pdha1	ODPA_MOUSE	12	6	18	1
Pyruvate dehydrogenase E1 component subunit beta	GN=Pdhb	ODPB_MOUSE	10	6	16	0.736966
Rab11fip1 protein	GN=Rab11fip1	Q05A58_MOUSE	5	8	13	-0.678072
RAB14 protein AC=Q50HX0 OS=Mus musculus (Mouse).	GN=Rab14	Q50HX0_MOUSE	19	12	31	0.662965
Rab18	GN=Rab18	Q0PD38_MOUSE	7	4	11	0.807355
Rab21	GN=Rab21	Q0PD35_MOUSE	11	10	21	0.137504
RAB22A	GN=Rab22a	A2ARZ7_MOUSE	4	2	6	1
Rab24	GN=Rab24	Q0PD31_MOUSE	3	1	4	1.58496
RAB27b	GN=Rab27b	Q4VA90_MOUSE	5	2	7	1.32193
Rab29	GN=Rab7l1	Q0PD25_MOUSE	1	1	2	0
RAB2A	GN=Rab2a	Q0PD65_MOUSE	8	22	30	-1.45943
Rab3 GTPase-activating protein non-catalytic subunit	GN=Rab3gap2	RBGPR_MOUSE	1	2	3	-1
Rab32	GN=Rab32	Q0PD23_MOUSE	4	9	13	-1.16993
Rab41	GN=Rab43	Q0PD10_MOUSE	4	4	8	0
RAB9	GN=Rab9	Q0PD48_MOUSE	4	1	5	2
RAC-beta serine/threonine-protein kinase	GN=Akt2	AKT2_MOUSE	1	3	4	-1.58496
RAD21 homolog (S. pombe) AC=A1L366 OS=Mus musculus (Mouse).	GN=Rad21	A1L366_MOUSE	5	5	10	0
RAD50 homolog (S. cerevisiae) AC=Q5SV02 OS=Mus musculus (Mouse).	GN=Rad50	Q5SV02_MOUSE	2	1	3	1
RAE1 RNA export 1 homolog (S. pombe)	GN=Rae1	A2ASC7_MOUSE	8	3	11	1.41504
RAN binding protein 3 AC=A6H6I9 OS=Mus musculus (Mouse).	GN=Ranbp3	A6H6I9_MOUSE	2	2	4	0
Ran-binding protein 9	GN=Ranbp9	RANB9_MOUSE	1	3	4	-1.58496
Ran-specific GTPase-activating protein	GN=Ranbp1	RANG_MOUSE	5	4	9	0.321928
Rap1 GTPase-activating protein 2	GN=Garnl4	RPGP2_MOUSE	3	6	9	-1
RAP2C	GN=Rap2c	A2AD86_MOUSE	7	6	13	0.222392
Rapgef2 protein AC=Q6NXI4 OS=Mus musculus (Mouse).	GN=Rapgef2	Q6NXI4_MOUSE	2	1	3	1
Rapgef6 protein AC=B2RUJ6 OS=Mus musculus (Mouse).	GN=Rapgef6	B2RUJ6_MOUSE	3	7	10	-1.22239
Ras and Rab interactor 3 AC=B2RQF8 OS=Mus musculus (Mouse).	GN=Rin3	B2RQF8_MOUSE	2	4	6	-1
Ras association (RalGDS/AF-6) domain family 2 AC=A2APB0 OS=Mus musculus (Mouse).	GN=Rassf2	A2APB0_MOUSE	5	8	13	-0.678072
Ras GTPase-activating protein-binding protein 1	GN=G3bp1	G3BP1_MOUSE	8	8	16	0
Ras GTPase-activating protein-binding protein 2	GN=G3bp2	G3BP2_MOUSE	7	3	10	1.22239
RAS guanyl-releasing protein 2	GN=Rasgrp2	GRP2_MOUSE	6	6	12	0
Ras suppressor protein 1	GN=Rsu1	A2AUR7_MOUSE	8	10	18	-0.321928
Ras-related GTP binding A AC=B1AXR0 OS=Mus musculus (Mouse).	GN=Rraga	B1AXR0_MOUSE	2	9	11	-2.16993
Ras-related GTP binding C AC=A2A7K7 OS=Mus musculus (Mouse).	GN=Rragc	A2A7K7_MOUSE	3	6	9	-1
Ras-related protein Ral-B AC=Q9JIW9 OS=Mus musculus (Mouse).	GN=Ralb	RALB_MOUSE	5	9	14	-0.847997
Ras-related protein Rap-1A	GN=Rap1a	RAP1A_MOUSE	47	37	84	0.345135
Ras-related protein Rap-2a AC=Q80ZJ1 OS=Mus musculus (Mouse).	GN=Rap2a	RAP2A_MOUSE	5	4	9	0.321928
Rbm12 protein AC=B6ICZ5 OS=Mus musculus (Mouse).	GN=Rbm12	B6ICZ5_MOUSE	0	3	3	N/A
Rbm39 protein AC=Q0VGU9 OS=Mus musculus (Mouse).	GN=Rbm39	Q0VGU9_MOUSE	8	7	15	0.192645
Receptor-interacting serine/threonine-protein kinase 1	GN=Ripk1	RIPK1_MOUSE	6	2	8	1.58496
Receptor-type tyrosine-protein phosphatase epsilon AC=P49446 OS=Mus musculus (Mouse).	GN=Ptpre	PTPRE_MOUSE	5	9	14	-0.847997
Regulation of nuclear pre-mRNA domain-containing protein 2 AC=Q6NXI6 OS=Mus musculus (Mouse).	GN=Rprd2	RPRD2_MOUSE	3	0	3	N/A
Regulator of chromosome condensation 1	GN=Rcc1	A2CER1_MOUSE	12	6	18	1
Regulator of chromosome condensation 2 AC=A2AWQ3 OS=Mus musculus (Mouse).	GN=Rcc2	A2AWQ3_MOUSE	13	16	29	-0.29956
Regulator of G-protein signaling 14 AC=Q8K2R4 OS=Mus musculus (Mouse).	GN=Rgs14	Q8K2R4_MOUSE	4	7	11	-0.807355
Regulator of G-protein signaling 19 AC=B7ZCT1 OS=Mus musculus (Mouse).	GN=Rgs19	B7ZCT1_MOUSE	1	3	4	-1.58496
Regulator of nonsense transcripts 1	GN=Upf1	RENT1_MOUSE	13	7	20	0.893085
Replication protein A 14 kDa subunit	GN=Rpa3	RFA3_MOUSE	2	3	5	-0.584963
Resistin like gamma	GN=Retnlg	Q7TM98_MOUSE	10	10	20	0
Reticulocalbin 2 AC=A2RT07 OS=Mus musculus (Mouse).	GN=Rcn2	A2RT07_MOUSE	3	0	3	N/A
Reticuloendotheliosis oncogene AC=A4QPD3 OS=Mus musculus (Mouse).	GN=Rel	A4QPD3_MOUSE	2	3	5	-0.584963
Reticulon-4	GN=Rtn4	RTN4_MOUSE	3	2	5	0.584963
Retinitis pigmentosa 2 homolog (Human)	GN=Rp2h	B1B076_MOUSE	2	2	4	0
Retinoblastoma binding protein 4	GN=Rbbp4	A2A875_MOUSE	10	15	25	-0.584963
Retinoblastoma binding protein 7 AC=A2AFJ0 OS=Mus musculus (Mouse).	GN=Rbbp7	A2AFJ0_MOUSE	9	10	19	-0.152003
Retinol dehydrogenase 12 AC=Q8BYK4 OS=Mus musculus (Mouse).	GN=Rdh12	RDH12_MOUSE	3	5	8	-0.736966
Retroviral-like aspartic protease 1	GN=Asprv1	APRV1_MOUSE	17	9	26	0.917538
Rho GTPase activating protein 1 AC=A2AGT9 OS=Mus musculus (Mouse).	GN=Arhgap1	A2AGT9_MOUSE	6	14	20	-1.22239
Rho GTPase activating protein 15 AC=B1AW39 OS=Mus musculus (Mouse).	GN=Arhgap15	B1AW39_MOUSE	4	5	9	-0.321928
Rho GTPase activating protein 25 AC=B2RS69 OS=Mus musculus (Mouse).	GN=Arhgap25	B2RS69_MOUSE	10	14	24	-0.485427
Rho GTPase-activating protein 17	GN=Arhgap17	RHG17_MOUSE	7	5	12	0.485427
Rho GTPase-activating protein 27	GN=Arhgap27	RHG27_MOUSE	1	3	4	-1.58496
Rho GTPase-activating protein 30	GN=Arhgap30	RHG30_MOUSE	2	2	4	0
Rho guanine nucleotide exchange factor 2	GN=Arhgef2	ARHG2_MOUSE	11	14	25	-0.347923
Ribonuclease H2 subunit B	GN=Rnaseh2b	RNH2B_MOUSE	3	2	5	0.584963
Ribonuclease L (2', 5'-oligoisoadenylate synthetase-dependent)	GN=Rnasel	B2RQP1_MOUSE	4	5	9	-0.321928
Ribonucleoprotein PTB-binding 1	GN=Raver1	RAVR1_MOUSE	3	6	9	-1
Ribonucleoside-diphosphate reductase AC=Q91YM8 OS=Mus musculus (Mouse).	GN=Rrm1	Q91YM8_MOUSE	6	6	12	0
Ribophorin II AC=A2ACG6 OS=Mus musculus (Mouse).	GN=Rpn2	A2ACG6_MOUSE	26	20	46	0.378512
Ribose-5-phosphate isomerase	GN=Rpia	RPIA_MOUSE	9	12	21	-0.415037
Ribosomal protein	GN=Rplp0	Q5FWB6_MOUSE	18	11	29	0.710493
Ribosomal protein L1 AC=Q3U561 OS=Mus musculus (Mouse).	GN=Rpl10a	Q3U561_MOUSE	5	4	9	0.321928
Ribosomal protein L11	GN=Rpl11	A2BH07_MOUSE	8	4	12	1
Ribosomal protein L21 AC=Q4VA28 OS=Mus musculus (Mouse).	GN=Rpl21	Q4VA28_MOUSE	2	2	4	0
Ribosomal protein L23	GN=Rpl23	A2A6F9_MOUSE	8	3	11	1.41504
Ribosomal protein S14 AC=O70569 OS=Mus musculus (Mouse).	GN=Rps14	O70569_MOUSE	2	3	5	-0.584963
Ribosomal protein S21	GN=Rps21	A2ABW8_MOUSE	5	6	11	-0.263034
Ribosomal protein S23 AC=Q497E1 OS=Mus musculus (Mouse).	GN=Rps23	Q497E1_MOUSE	5	4	9	0.321928
Ribosomal protein S27A	GN=Rps27a	Q642L7_MOUSE	7	12	19	-0.777608
Ribosomal protein S28	GN=Rps28	Q059I1_MOUSE	4	3	7	0.415037
Ribosomal protein S6 kinase beta-2	GN=Rps6kb2	KS6B2_MOUSE	1	1	2	0
Ribosome binding protein 1 AC=A2AVJ7 OS=Mus musculus (Mouse).	GN=Rrbp1	A2AVJ7_MOUSE	16	6	22	1.41504
Ribosome maturation protein SBDS	GN=Sbds	SBDS_MOUSE	1	2	3	-1
Ribosyldihydronicotinamide dehydrogenase [quinone]	GN=Nqo2	NQO2_MOUSE	2	5	7	-1.32193
Ribulose-5-phosphate-3-epimerase	GN=Rpe	B2KGE9_MOUSE	2	2	4	0
RIKEN cDNA C330023M02 gene	GN=C330023M02Rik	B2RQV1_MOUSE	2	2	4	0
RIKEN cDNA C330027C09 gene AC=B2RQ25 OS=Mus musculus (Mouse).	GN=C330027C09Rik	B2RQ25_MOUSE	1	2	3	-1
Ring finger protein 114	GN=Rnf114	A2A462_MOUSE	2	2	4	0
Ring finger protein 20 AC=A2AIR3 OS=Mus musculus (Mouse).	GN=Rnf20	A2AIR3_MOUSE	7	2	9	1.80735
Ring finger protein 213 AC=B1ATE2 OS=Mus musculus (Mouse).	GN=Rnf213	B1ATE2_MOUSE	9	8	17	0.169925
RNA binding motif protein 15 AC=Q0VBL3 OS=Mus musculus (Mouse).	GN=Rbm15	Q0VBL3_MOUSE	3	0	3	N/A
RNA binding motif protein 17 AC=A2AP41 OS=Mus musculus (Mouse).	GN=Rbm17	A2AP41_MOUSE	2	2	4	0
RNA binding motif protein 4 AC=A1L3S3 OS=Mus musculus (Mouse).	GN=Rbm4	A1L3S3_MOUSE	3	0	3	N/A
RNA binding motif protein 7	GN=Rbm7	Q14A95_MOUSE	3	0	3	N/A
RNA polymerase II subunit A C-terminal domain phosphatase	GN=Ctdp1	CTDP1_MOUSE	2	3	5	-0.584963
RNA polymerase II subunit A C-terminal domain phosphatase SSU72 AC=Q9CY97 OS=Mus musculus (Mouse).	GN=Ssu72	SSU72_MOUSE	2	5	7	-1.32193
RNA polymerase II-associated factor 1 homolog AC=Q8K2T8 OS=Mus musculus (Mouse).	GN=Paf1	PAF1_MOUSE	2	4	6	-1
RNA polymerase-associated protein CTR9 homolog	GN=Ctr9	CTR9_MOUSE	3	2	5	0.584963
RNA-binding protein 10	GN=Rbm10	RBM10_MOUSE	4	3	7	0.415037
RNA-binding protein 25	GN=Rbm25	RBM25_MOUSE	5	9	14	-0.847997
RNA-binding protein 42	GN=Rbm42	RBM42_MOUSE	2	2	4	0
RNA-binding protein 8A	GN=Rbm8a	RBM8A_MOUSE	4	1	5	2
RNA-binding protein FUS	GN=Fus	FUS_MOUSE	10	10	20	0
Rnf160 protein AC=Q14B86 OS=Mus musculus (Mouse).	GN=Zfp294	Q14B86_MOUSE	3	0	3	N/A
Rpl17 protein AC=Q505B1 OS=Mus musculus (Mouse).	GN=Rpl17	Q505B1_MOUSE	8	1	9	3
Rpl30 protein AC=Q497D7 OS=Mus musculus (Mouse).	GN=Rpl30	Q497D7_MOUSE	10	5	15	1
Rps16 protein	GN=ENSMUSG00000060419	A4FUS1_MOUSE	11	6	17	0.874469
Rps19 protein AC=Q5M9P3 OS=Mus musculus (Mouse).	GN=Rps19	Q5M9P3_MOUSE	7	2	9	1.80735
Rps9 protein AC=Q96EC0 OS=Mus musculus (Mouse).	GN=Rps9	Q96EC0_MOUSE	3	2	5	0.584963
rRNA 2'-O-methyltransferase fibrillarin	GN=Fbl	FBRL_MOUSE	7	5	12	0.485427
Rtf1 Paf1/RNA polymerase II complex component homolog (S. cerevisiae) AC=A2AQ19 OS=Mus musculus (Mouse).	GN=Rtf1	A2AQ19_MOUSE	1	2	3	-1
RTN4	GN=Rtn4	Q8BH78_MOUSE	3	3	6	0
RUN and FYVE domain-containing protein 1	GN=Rufy1	RUFY1_MOUSE	4	7	11	-0.807355
S-adenosylmethionine synthetase AC=Q3UAP7 OS=Mus musculus (Mouse).	GN=Mat2a	Q3UAP7_MOUSE	3	2	5	0.584963
S-adenosylmethionine synthetase isoform type-2	GN=Mat2a	METK2_MOUSE	4	1	5	2
SAFB-like	GN=Sltm	B9EI57_MOUSE	4	2	6	1
SAM and SH3 domain containing 3	GN=Sash3	B1AVD3_MOUSE	3	8	11	-1.41504
SAR1 gene homolog B (S. cerevisiae) AC=Q0VGU0 OS=Mus musculus (Mouse).	GN=Sar1b	Q0VGU0_MOUSE	13	8	21	0.70044
Sarcolemmal membrane-associated protein AC=Q3URD3 OS=Mus musculus (Mouse).	GN=Slmap	SLMAP_MOUSE	2	1	3	1
Sbf1 protein AC=B2RXQ1 OS=Mus musculus (Mouse).	GN=Sbf1	B2RXQ1_MOUSE	3	4	7	-0.415037
Sbno1 protein AC=B2RRI2 OS=Mus musculus (Mouse).	GN=Sbno1	B2RRI2_MOUSE	0	3	3	N/A
Scaffold attachment factor B2 AC=Q80YR5 OS=Mus musculus (Mouse).	GN=Safb2	SAFB2_MOUSE	7	6	13	0.222392
Scavenger mRNA-decapping enzyme DcpS	GN=Dcps	DCPS_MOUSE	3	10	13	-1.73697
Schlafen1	GN=Slfn1	Q9Z0I7_MOUSE	8	12	20	-0.584963
SCY1-like protein 2	GN=Scyl2	SCYL2_MOUSE	3	4	7	-0.415037
Sec1 family domain-containing protein 1	GN=Scfd1	SCFD1_MOUSE	13	9	22	0.530515
SEC16 homolog A (S. cerevisiae) AC=A2AIX1 OS=Mus musculus (Mouse).	GN=Sec16a	A2AIX1_MOUSE	3	3	6	0
Sec23ip protein AC=A0AUN0 OS=Mus musculus (Mouse).	GN=Sec23ip	A0AUN0_MOUSE	5	2	7	1.32193
SEC63 AC=Q80YG4 OS=Mus musculus (Mouse).	GN=Sec63	Q80YG4_MOUSE	6	1	7	2.58496
Selenium-binding protein 1	GN=Selenbp1	SBP1_MOUSE	3	11	14	-1.87447
Selenocysteine lyase AC=Q9JLI6 OS=Mus musculus (Mouse).	GN=Scly	SCLY_MOUSE	1	5	6	-2.32193
Selenophosphate synthetase 1	GN=Sephs1	A2AMN4_MOUSE	5	3	8	0.736966
Semaphorin-4A	GN=Sema4a	SEM4A_MOUSE	3	3	6	0
Sepiapterin reductase AC=Q91XH5 OS=Mus musculus (Mouse).	GN=Spr	Q91XH5_MOUSE	4	0	4	N/A
Septin 1 AC=B2RU74 OS=Mus musculus (Mouse).	GN=Sept1	B2RU74_MOUSE	3	0	3	N/A
Septin 2	GN=Sept2	B2RRZ2_MOUSE	5	5	10	0
Septin 5 AC=B2RUC5 OS=Mus musculus (Mouse).	GN=Sept5	B2RUC5_MOUSE	10	7	17	0.514573
Septin 9 AC=A2A6U2 OS=Mus musculus (Mouse).	GN=Sept9	A2A6U2_MOUSE	9	13	22	-0.530515
Serine protease HTRA2	GN=Htra2	HTRA2_MOUSE	7	3	10	1.22239
Serine/arginine repetitive matrix 1 AC=A2A8V8 OS=Mus musculus (Mouse).	GN=Srrm1	A2A8V8_MOUSE	2	2	4	0
Serine/arginine repetitive matrix protein 2 AC=Q8BTI8 OS=Mus musculus (Mouse).	GN=Srrm2	SRRM2_MOUSE	14	8	22	0.807355
Serine/threonine kinase 38	GN=Stk38	B2KF04_MOUSE	3	7	10	-1.22239
Serine/threonine kinase 4 AC=A2A5L8 OS=Mus musculus (Mouse).	GN=Stk4	A2A5L8_MOUSE	12	14	26	-0.222392
Serine/threonine kinase receptor associated protein AC=B2RUC7 OS=Mus musculus (Mouse).	GN=Strap	B2RUC7_MOUSE	8	6	14	0.415037
Serine/threonine protein phosphatase AC=B2RRX2 OS=Mus musculus (Mouse).	GN=Ppp3ca	B2RRX2_MOUSE	4	6	10	-0.584963
Serine/threonine-protein kinase 17B	GN=Stk17b	ST17B_MOUSE	3	3	6	0
Serine/threonine-protein kinase D2	GN=Prkd2	KPCD2_MOUSE	5	6	11	-0.263034
Serine/threonine-protein kinase MARK2	GN=Mark2	MARK2_MOUSE	3	4	7	-0.415037
Serine/threonine-protein kinase mTOR	GN=Frap1	FRAP_MOUSE	1	3	4	-1.58496
Serine/threonine-protein kinase N1	GN=Pkn1	PKN1_MOUSE	8	8	16	0
Serine/threonine-protein kinase OSR1	GN=Oxsr1	OXSR1_MOUSE	4	5	9	-0.321928
Serine/threonine-protein kinase SMG1 AC=Q8BKX6 OS=Mus musculus (Mouse).	GN=Smg1	SMG1_MOUSE	3	3	6	0
Serine/threonine-protein kinase SRPK2	GN=Srpk2	SRPK2_MOUSE	3	3	6	0
Serine/threonine-protein phosphatase 2A 55 kDa regulatory subunit B alpha isoform	GN=Ppp2r2a	2ABA_MOUSE	6	6	12	0
Serine/threonine-protein phosphatase 2A 55 kDa regulatory subunit B delta isoform	GN=Ppp2r2d	2ABD_MOUSE	4	5	9	-0.321928
Serine/threonine-protein phosphatase 2A 56 kDa regulatory subunit alpha isoform	GN=Ppp2r5a	2A5A_MOUSE	5	11	16	-1.1375
Serine/threonine-protein phosphatase 2A catalytic subunit alpha isoform AC=P63330 OS=Mus musculus (Mouse).	GN=Ppp2ca	PP2AA_MOUSE	10	16	26	-0.678072
Serine/threonine-protein phosphatase 2A catalytic subunit beta isoform AC=P62715 OS=Mus musculus (Mouse).	GN=Ppp2cb	PP2AB_MOUSE	10	16	26	-0.678072
Serine/threonine-protein phosphatase 2A regulatory subunit B'	GN=Ppp2r4	PTPA_MOUSE	4	11	15	-1.45943
Serine/threonine-protein phosphatase 2B catalytic subunit beta isoform	GN=Ppp3cb	PP2BB_MOUSE	4	5	9	-0.321928
Serine/threonine-protein phosphatase 4 regulatory subunit 1 AC=Q8K2V1 OS=Mus musculus (Mouse).	GN=Ppp4r1	PP4R1_MOUSE	2	2	4	0
Serine/threonine-protein phosphatase 4 regulatory subunit 2 AC=Q0VGB7 OS=Mus musculus (Mouse).	GN=Ppp4r2	PP4R2_MOUSE	2	1	3	1
Serine/threonine-protein phosphatase 4 regulatory subunit 3A	GN=Smek1	P4R3A_MOUSE	2	0	2	N/A
Serine/threonine-protein phosphatase 4 regulatory subunit 3B	GN=Smek2	P4R3B_MOUSE	2	0	2	N/A
Serine/threonine-protein phosphatase 5	GN=Ppp5c	PPP5_MOUSE	2	2	4	0
Serine/threonine-protein phosphatase 6 catalytic subunit AC=Q9CQR6 OS=Mus musculus (Mouse).	GN=Ppp6c	PPP6_MOUSE	2	6	8	-1.58496
Serine/threonine-protein phosphatase 6 regulatory ankyrin repeat subunit A	GN=Ankrd28	ANR28_MOUSE	2	1	3	1
Serpina1d protein AC=Q8VC41 OS=Mus musculus (Mouse).	GN=Serpina1d	Q8VC41_MOUSE	10	7	17	0.514573
Serum paraoxonase/arylesterase 2	GN=Pon2	PON2_MOUSE	5	3	8	0.736966
Serum paraoxonase/lactonase 3 AC=Q62087 OS=Mus musculus (Mouse).	GN=Pon3	PON3_MOUSE	3	2	5	0.584963
Seryl-aminoacyl-tRNA synthetase AC=A2AFR8 OS=Mus musculus (Mouse).	GN=Sars	A2AFR8_MOUSE	10	6	16	0.736966
SET translocation AC=A2BE93 OS=Mus musculus (Mouse).	GN=Set	A2BE93_MOUSE	9	7	16	0.36257
SET translocation AC=A2BE95 OS=Mus musculus (Mouse).	GN=Set	A2BE95_MOUSE	9	7	16	0.36257
S-formylglutathione hydrolase	GN=Esd	ESTD_MOUSE	14	10	24	0.485427
SH2 domain containing 3C	GN=Sh2d3c	A2AK83_MOUSE	2	1	3	1
SH2B adapter protein 1	GN=Sh2b1	SH2B1_MOUSE	2	1	3	1
SH3 domain-binding glutamic acid-rich-like protein 3 AC=Q91VW3 OS=Mus musculus (Mouse).	GN=Sh3bgrl3	SH3L3_MOUSE	9	8	17	0.169925
SH3-binding domain glutamic acid-rich protein like AC=A2ALN7 OS=Mus musculus (Mouse).	GN=Sh3bgrl	A2ALN7_MOUSE	4	6	10	-0.584963
SH3-domain binding protein 1 AC=A2A5V2 OS=Mus musculus (Mouse).	GN=Sh3bp1	A2A5V2_MOUSE	10	11	21	-0.137504
SH3-domain kinase binding protein 1 AC=A2AG61 OS=Mus musculus (Mouse).	GN=Sh3kbp1	A2AG61_MOUSE	8	9	17	-0.169925
SH3-lymphocyte protein 2 AC=Q2LE09 OS=Mus musculus (Mouse).	GN=Samsn1	Q2LE09_MOUSE	8	5	13	0.678072
SHC-transforming protein 1	GN=Shc1	SHC1_MOUSE	5	4	9	0.321928
Short/branched chain specific acyl-CoA dehydrogenase	GN=Acadsb	ACDSB_MOUSE	5	6	11	-0.263034
Sialic acid-binding Ig-like lectin 12	GN=Siglec12	SIG12_MOUSE	4	3	7	0.415037
Sideroflexin-1 AC=Q99JR1 OS=Mus musculus (Mouse).	GN=Sfxn1	SFXN1_MOUSE	5	4	9	0.321928
Signal peptidase complex subunit 1	GN=Spcs1	SPCS1_MOUSE	2	3	5	-0.584963
Signal peptidase complex subunit 2	GN=Spcs2	SPCS2_MOUSE	10	5	15	1
Signal recognition particle 54 kDa protein AC=P14576 OS=Mus musculus (Mouse).	GN=Srp54	SRP54_MOUSE	7	11	18	-0.652077
Signal recognition particle 68 AC=A2AAN1 OS=Mus musculus (Mouse).	GN=Srp68	A2AAN1_MOUSE	8	9	17	-0.169925
Signal transducer and activator of transcription 5B AC=A2A5D5 OS=Mus musculus (Mouse).	GN=Stat5b	A2A5D5_MOUSE	13	12	25	0.115477
Signal transducing adaptor family member 1 AC=A6H6C6 OS=Mus musculus (Mouse).	GN=Stap1	A6H6C6_MOUSE	2	2	4	0
Signal transducing adaptor molecule (SH3 domain and ITAM motif) 2 AC=A2AU00 OS=Mus musculus (Mouse).	GN=Stam2	A2AU00_MOUSE	1	1	2	0
Signal-regulatory protein alpha	GN=Sirpa	Q6P6I8_MOUSE	7	6	13	0.222392
Single-stranded DNA binding protein 1	GN=Ssbp1	Q8R2K3_MOUSE	6	2	8	1.58496
Sirpb1 protein AC=B7ZNT3 OS=Mus musculus (Mouse).	GN=Sirpb1	B7ZNT3_MOUSE	3	2	5	0.584963
Sirtuin 7 (Silent mating type information regulation 2	GN=Sirt7	A2ABY7_MOUSE	2	1	3	1
Sjogren syndrome antigen B AC=A2AR07 OS=Mus musculus (Mouse).	GN=Ssb	A2AR07_MOUSE	4	10	14	-1.32193
SLAM family member 5	GN=Cd84	SLAF5_MOUSE	4	2	6	1
Slingshot homolog 2 (Drosophila) AC=B9EJ94 OS=Mus musculus (Mouse).	GN=Ssh2	B9EJ94_MOUSE	0	3	3	N/A
SLIT-ROBO Rho GTPase activating protein 2 AC=B2RY13 OS=Mus musculus (Mouse).	GN=Srgap2	B2RY13_MOUSE	4	2	6	1
Small nuclear ribonucleoprotein 70 (U1)	GN=Snrnp70	A2RS68_MOUSE	7	3	10	1.22239
Small nuclear ribonucleoprotein B	GN=Snrpb	A2APD4_MOUSE	7	11	18	-0.652077
Small nuclear ribonucleoprotein D3 AC=Q91VM2 OS=Mus musculus (Mouse).	GN=Snrpd3	Q91VM2_MOUSE	4	2	6	1
Small nuclear ribonucleoprotein E AC=P62305 OS=Mus musculus (Mouse).	GN=Snrpe	RUXE_MOUSE	2	5	7	-1.32193
Small subunit processome component 20 homolog	GN=Utp20	UTP20_MOUSE	4	0	4	N/A
Small ubiquitin-related modifier 3	GN=Sumo3	SUMO3_MOUSE	4	3	7	0.415037
Smc4 protein AC=Q6P7V9 OS=Mus musculus (Mouse).	GN=Smc4	Q6P7V9_MOUSE	10	12	22	-0.263034
SMT3 suppressor of mif two 3 homolog 2 (Yeast) AC=A2A9X2 OS=Mus musculus (Mouse).	GN=Sumo2	A2A9X2_MOUSE	5	3	8	0.736966
Smu-1 suppressor of mec-8 and unc-52 homolog (C. elegans) AC=B1AXY3 OS=Mus musculus (Mouse).	GN=Smu1	B1AXY3_MOUSE	7	3	10	1.22239
SNW domain-containing protein 1	GN=Snw1	SNW1_MOUSE	5	5	10	0
Sodium/nucleoside cotransporter 2	GN=Slc28a2	S28A2_MOUSE	5	6	11	-0.263034
Sodium/potassium-transporting ATPase subunit beta-3	GN=Atp1b3	AT1B3_MOUSE	3	2	5	0.584963
Solute carrier family 12	GN=Slc12a6	A2AGJ6_MOUSE	2	2	4	0
Solute carrier family 2	GN=Slc2a3	GTR3_MOUSE	9	12	21	-0.415037
Solute carrier family 2	GN=Slc2a1	GTR1_MOUSE	2	1	3	1
Solute carrier family 35 member E1 AC=Q8CD26 OS=Mus musculus (Mouse).	GN=Slc35e1	S35E1_MOUSE	2	2	4	0
Son protein AC=Q811G3 OS=Mus musculus (Mouse).	GN=Son	Q811G3_MOUSE	11	2	13	2.45943
Sorbitol dehydrogenase	GN=Sord	DHSO_MOUSE	3	4	7	-0.415037
Sorcin AC=Q6P069 OS=Mus musculus (Mouse).	GN=Sri	SORCN_MOUSE	15	19	34	-0.341037
Sortilin 1 AC=A2AEE8 OS=Mus musculus (Mouse).	GN=Sort1	A2AEE8_MOUSE	5	1	6	2.32193
Sorting and assembly machinery component 50 homolog AC=Q8BGH2 OS=Mus musculus (Mouse).	GN=Samm50	SAM50_MOUSE	2	5	7	-1.32193
Sorting nexin 5 AC=A2ANA4 OS=Mus musculus (Mouse).	GN=Snx5	A2ANA4_MOUSE	2	2	4	0
Sorting nexin-27 AC=Q3UHD6 OS=Mus musculus (Mouse).	GN=Snx27	SNX27_MOUSE	2	4	6	-1
Sp110 nuclear body protein	GN=Sp110	SP110_MOUSE	5	2	7	1.32193
Sp140 nuclear body protein AC=Q6NSQ5 OS=Mus musculus (Mouse).	GN=Sp140	Q6NSQ5_MOUSE	1	3	4	-1.58496
Spastic paraplegia 21 homolog (Human)	GN=Spg21	A2RT57_MOUSE	3	3	6	0
Spastin AC=Q9QYY8 OS=Mus musculus (Mouse).	GN=Spast	SPAST_MOUSE	1	2	3	-1
Sperm associated antigen 7 AC=A2CFD0 OS=Mus musculus (Mouse).	GN=Spag7	A2CFD0_MOUSE	3	2	5	0.584963
Spermatid perinuclear RNA binding protein	GN=Strbp	A2BH81_MOUSE	1	2	3	-1
Sphingolipid delta(4)-desaturase DES1	GN=Degs1	DEGS1_MOUSE	2	3	5	-0.584963
Sphingomyelin phosphodiesterase 4	GN=Smpd4	NSMA3_MOUSE	2	2	4	0
Splicing factor	GN=Sfrs3	B2KF41_MOUSE	9	10	19	-0.152003
Splicing factor	GN=Sfrs1	SFRS1_MOUSE	19	10	29	0.925999
Splicing factor	GN=Sfrs2	A2AA29_MOUSE	3	3	6	0
Splicing factor	GN=Sfrs16	SFR16_MOUSE	2	1	3	1
Splicing factor 3 subunit 1	GN=Sf3a1	SF3A1_MOUSE	11	13	24	-0.241008
Splicing factor 3B subunit 4 AC=Q8QZY9 OS=Mus musculus (Mouse).	GN=Sf3b4	SF3B4_MOUSE	5	3	8	0.736966
Squamous cell carcinoma antigen recognized by T-cells 3	GN=Sart3	SART3_MOUSE	6	6	12	0
Srp72 protein AC=A0JLN1 OS=Mus musculus (Mouse).	GN=Srp72	A0JLN1_MOUSE	6	2	8	1.58496
Stathmin AC=Q545B6 OS=Mus musculus (Mouse).	GN=Stmn1	Q545B6_MOUSE	10	8	18	0.321928
Sterol carrier protein 2	GN=Scp2	A2APS3_MOUSE	23	9	32	1.35364
Sterol O-acyltransferase 1 AC=Q06EZ3 OS=Mus musculus (Mouse).	GN=Soat1	Q06EZ3_MOUSE	3	3	6	0
Sterol-4-alpha-carboxylate 3-dehydrogenase	GN=Nsdhl	NSDHL_MOUSE	3	4	7	-0.415037
Stomatin	GN=Stom	A2AL38_MOUSE	8	4	12	1
Striatin	GN=Strn	B2RWV9_MOUSE	6	11	17	-0.874469
Stromal cell-derived factor 2-like protein 1 AC=Q9ESP1 OS=Mus musculus (Mouse).	GN=Sdf2l1	SDF2L_MOUSE	5	2	7	1.32193
Stromal membrane-associated GTPase-activating protein 2 AC=B1AVZ1 OS=Mus musculus (Mouse).	GN=Smap2	B1AVZ1_MOUSE	5	4	9	0.321928
Stromal membrane-associated protein 1 AC=Q91VZ6 OS=Mus musculus (Mouse).	GN=Smap1	SMAP1_MOUSE	3	5	8	-0.736966
Structural maintenance of chromosomes flexible hinge domain-containing protein 1 AC=Q6P5D8 OS=Mus musculus (Mouse).	GN=Smchd1	SMHD1_MOUSE	10	7	17	0.514573
Structure specific recognition protein 1 AC=A2AW05 OS=Mus musculus (Mouse).	GN=Ssrp1	A2AW05_MOUSE	7	8	15	-0.192645
Strumpellin AC=Q8C2E7 OS=Mus musculus (Mouse).	GN=Kiaa0196	STRUM_MOUSE	3	2	5	0.584963
Succinate dehydrogenase complex subunit B AC=Q0QEZ4 OS=Mus musculus (Mouse).	GN=Sdhb	Q0QEZ4_MOUSE	8	3	11	1.41504
Succinyl-CoA ligase [GDP-forming] subunit alpha	GN=Suclg1	SUCA_MOUSE	4	1	5	2
Succinyl-CoA ligase [GDP-forming] subunit beta	GN=Suclg2	SUCB2_MOUSE	7	3	10	1.22239
Sulfhydryl oxidase 1	GN=Qsox1	QSOX1_MOUSE	15	15	30	0
SUMO-activating enzyme subunit 1	GN=Sae1	SAE1_MOUSE	8	13	21	-0.70044
Superoxide dismutase [Cu-Zn] AC=P08228 OS=Mus musculus (Mouse).	GN=Sod1	SODC_MOUSE	10	9	19	0.152003
Suppressor of G2 allele of SKP1 homolog AC=Q9CX34 OS=Mus musculus (Mouse).	GN=Sugt1	SUGT1_MOUSE	6	10	16	-0.736966
SWI/SNF related	GN=Smarce1	A2A4L8_MOUSE	3	3	6	0
SWI/SNF related	GN=Smarcd2	B1ARI7_MOUSE	2	3	5	-0.584963
Symplekin AC=Q80X82 OS=Mus musculus (Mouse).	GN=Sympk	SYMPK_MOUSE	4	6	10	-0.584963
[truncated: 248 more rows]
